# Supplementary material for: Stress in Study: Assessing Depression Differences Among Medical and Non- Medical Students
Source: Research Square preprint supplement (doi:10.21203/rs.3.rs-7508873/v1), 2025-09-16
Supplement: Supplementary file 1 [file 35ad16503984b3d33cc41ee7.xlsx]

## Sheet: Form Responses 1
Age	Gender	Educational Background	Year of study	Have you ever smoked?	How often do you consume alcohol?	On a scale of 1 to 10, how would you rate your stress level? (1 = low stress, 10 = high stress)	How many hours of sleep do you get on average per night?	1. Little interest or pleasure in doing things	2. Feeling down, depressed, or hopeless	3. Trouble falling or staying asleep, or sleeping too much	4. Feeling tired or having little energy	5. Poor appetite or overeating	6. Feeling bad about yourself or that you are a failure or have let yourself or your family down	7. Trouble concentrating on things, such as reading the newspaper or watching television	8. Moving or speaking so slowly that other people could have noticed. Or the opposite being so figety or restless that you have been moving around a lot more than usual	9. Thoughts that you would be better off dead, or of hurting yourself	1. I found it hard to wind down	2. I was aware of dryness of my mouth	3. I couldn’t seem to experience any positive feeling at all	4. I experienced breathing difficulty (e.g. excessively rapid breathing, breathlessness in the absence of physical exertion)	5. I found it difficult to work up the initiative to do things	6. I tended to over-react to situations	7. I experienced trembling (e.g. in the hands)	8. I felt that I was using a lot of nervous energy	9. I was worried about situations in which I might panic and make a fool of myself	10. I felt that I had nothing to look forward to	11. I found myself getting agitated (emotionally disturbed or excited, often in a negative way).	12. I found it difficult to relax	13. I felt down-hearted and blue (feeling sad or depressed).	14. I was intolerant of anything that kept me from getting on with what I was doing	15. I felt I was close to panic	16. I was unable to become enthusiastic about anything	17. I felt I wasn’t worth much as a person	18. I felt that I was rather touchy (easily irritated or sensitive).	19. I was aware of the action of my heart in the absence of physical exertion (e.g. sense of heart rate increase, heart missing a beat)	20. I felt scared without any good reason	21. I felt that life was meaningless
23	Male	Non-medical	3	Non-smoker	None	6	7	More than half the days	Several days	Not at all	More than half the days	Not at all	Not at all	Several days	Not at all	Several days	Applied to me to some degree, or some of the time	Did not apply to me at all	Did not apply to me at all	Did not apply to me at all	Applied to me to some degree, or some of the time	Applied to me to some degree, or some of the time	Did not apply to me at all	Applied to me to a considerable degree or a good part of time	Applied to me to some degree, or some of the time	Applied to me to some degree, or some of the time	Applied to me to some degree, or some of the time	Applied to me to some degree, or some of the time	Applied to me to some degree, or some of the time	Applied to me to some degree, or some of the time	Did not apply to me at all	Did not apply to me at all	Did not apply to me at all	Did not apply to me at all	Applied to me to some degree, or some of the time	Applied to me to some degree, or some of the time	Applied to me to some degree, or some of the time
26	Male	Medical	5	Non-smoker	None	1	8	Nearly every day	Several days	Nearly every day	More than half the days	More than half the days	More than half the days	More than half the days	More than half the days	More than half the days	Applied to me to a considerable degree or a good part of time	Did not apply to me at all	Did not apply to me at all	Did not apply to me at all	Did not apply to me at all	Did not apply to me at all	Did not apply to me at all	Did not apply to me at all	Did not apply to me at all	Did not apply to me at all	Did not apply to me at all	Did not apply to me at all	Did not apply to me at all	Did not apply to me at all	Did not apply to me at all	Did not apply to me at all	Did not apply to me at all	Did not apply to me at all	Did not apply to me at all	Did not apply to me at all	Did not apply to me at all
23	Male	Medical	5	Non-smoker	None	1	6	Nearly every day	Not at all	Not at all	Not at all	Several days	Not at all	Not at all	Not at all	Not at all	Did not apply to me at all	Applied to me to some degree, or some of the time	Did not apply to me at all	Did not apply to me at all	Did not apply to me at all	Did not apply to me at all	Applied to me to some degree, or some of the time	Did not apply to me at all	Did not apply to me at all	Did not apply to me at all	Did not apply to me at all	Did not apply to me at all	Did not apply to me at all	Did not apply to me at all	Did not apply to me at all	Did not apply to me at all	Did not apply to me at all	Did not apply to me at all	Did not apply to me at all	Did not apply to me at all	Did not apply to me at all
24	Male	Medical	5	Non-smoker	None	5	10	More than half the days	Nearly every day	Not at all	Several days	Several days	Several days	Not at all	Not at all	Not at all	Did not apply to me at all	Did not apply to me at all	Did not apply to me at all	Did not apply to me at all	Did not apply to me at all	Did not apply to me at all	Did not apply to me at all	Did not apply to me at all	Did not apply to me at all	Did not apply to me at all	Did not apply to me at all	Did not apply to me at all	Did not apply to me at all	Did not apply to me at all	Did not apply to me at all	Did not apply to me at all	Did not apply to me at all	Did not apply to me at all	Did not apply to me at all	Did not apply to me at all	Did not apply to me at all
22	Male	Medical	3	Current smoker	None	5	3	Several days	Several days	Several days	More than half the days	Not at all	Nearly every day	Nearly every day	Not at all	Not at all	Did not apply to me at all	Applied to me very much or most of the time	Applied to me to some degree, or some of the time	Applied to me very much or most of the time	Applied to me to some degree, or some of the time	Did not apply to me at all	Applied to me to some degree, or some of the time	Did not apply to me at all	Did not apply to me at all	Did not apply to me at all	Did not apply to me at all	Applied to me to some degree, or some of the time	Applied to me to some degree, or some of the time	Did not apply to me at all	Did not apply to me at all	Applied to me to some degree, or some of the time	Did not apply to me at all	Did not apply to me at all	Applied to me very much or most of the time	Did not apply to me at all	Did not apply to me at all
20	Female	Non-medical	2	Non-smoker	None	7	8	Nearly every day	More than half the days	Not at all	Nearly every day	Several days	More than half the days	More than half the days	Several days	Not at all	Did not apply to me at all	Applied to me to some degree, or some of the time	Applied to me to a considerable degree or a good part of time	Did not apply to me at all	Applied to me very much or most of the time	Applied to me to a considerable degree or a good part of time	Did not apply to me at all	Did not apply to me at all	Did not apply to me at all	Applied to me to some degree, or some of the time	Applied to me to a considerable degree or a good part of time	Applied to me to some degree, or some of the time	Applied to me to a considerable degree or a good part of time	Applied to me to some degree, or some of the time	Did not apply to me at all	Did not apply to me at all	Applied to me to a considerable degree or a good part of time	Applied to me to a considerable degree or a good part of time	Applied to me to a considerable degree or a good part of time	Applied to me to some degree, or some of the time	Applied to me to a considerable degree or a good part of time
19	Female	Medical	2	Non-smoker	None	4	6	Not at all	Several days	Not at all	Not at all	Not at all	Not at all	Not at all	Several days	Not at all	Did not apply to me at all	Did not apply to me at all	Did not apply to me at all	Did not apply to me at all	Applied to me to some degree, or some of the time	Applied to me to some degree, or some of the time	Applied to me to some degree, or some of the time	Did not apply to me at all	Applied to me to some degree, or some of the time	Applied to me to some degree, or some of the time	Applied to me to some degree, or some of the time	Applied to me to some degree, or some of the time	Applied to me to some degree, or some of the time	Applied to me to some degree, or some of the time	Applied to me to some degree, or some of the time	Applied to me to some degree, or some of the time	Applied to me to some degree, or some of the time	Applied to me to some degree, or some of the time	Applied to me to some degree, or some of the time	Applied to me to some degree, or some of the time	Applied to me to some degree, or some of the time
18	Male	Medical	2	Non-smoker	None	10	6	Not at all	Nearly every day	Several days	More than half the days	Several days	Nearly every day	Nearly every day	Several days	Several days	Applied to me to some degree, or some of the time	Applied to me to some degree, or some of the time	Applied to me to some degree, or some of the time	Applied to me to some degree, or some of the time	Applied to me very much or most of the time	Applied to me very much or most of the time	Applied to me to a considerable degree or a good part of time	Applied to me very much or most of the time	Applied to me to a considerable degree or a good part of time	Applied to me to a considerable degree or a good part of time	Applied to me very much or most of the time	Applied to me very much or most of the time	Applied to me very much or most of the time	Applied to me to a considerable degree or a good part of time	Applied to me to a considerable degree or a good part of time	Applied to me to a considerable degree or a good part of time	Applied to me very much or most of the time	Applied to me very much or most of the time	Applied to me to a considerable degree or a good part of time	Applied to me to a considerable degree or a good part of time	Applied to me to a considerable degree or a good part of time
22	Male	Medical	4	Non-smoker	None	7	5	Several days	Several days	Nearly every day	Nearly every day	More than half the days	Nearly every day	Nearly every day	Several days	Not at all	Applied to me to some degree, or some of the time	Did not apply to me at all	Did not apply to me at all	Did not apply to me at all	Did not apply to me at all	Did not apply to me at all	Did not apply to me at all	Applied to me to some degree, or some of the time	Applied to me to a considerable degree or a good part of time	Did not apply to me at all	Applied to me to some degree, or some of the time	Did not apply to me at all	Applied to me to some degree, or some of the time	Applied to me to a considerable degree or a good part of time	Did not apply to me at all	Applied to me to some degree, or some of the time	Did not apply to me at all	Applied to me to some degree, or some of the time	Did not apply to me at all	Did not apply to me at all	Did not apply to me at all
22	Male	Medical	4	Non-smoker	None	1	6	Not at all	Not at all	Not at all	Not at all	Not at all	Not at all	Not at all	Not at all	Not at all	Did not apply to me at all	Did not apply to me at all	Did not apply to me at all	Did not apply to me at all	Did not apply to me at all	Did not apply to me at all	Did not apply to me at all	Did not apply to me at all	Did not apply to me at all	Did not apply to me at all	Did not apply to me at all	Did not apply to me at all	Did not apply to me at all	Did not apply to me at all	Did not apply to me at all	Did not apply to me at all	Did not apply to me at all	Did not apply to me at all	Did not apply to me at all	Did not apply to me at all	Did not apply to me at all
21	Male	Non-medical	3	Non-smoker	None	10	5	More than half the days	Nearly every day	More than half the days	Nearly every day	Not at all	Not at all	Not at all	Not at all	Several days	Applied to me to a considerable degree or a good part of time	Applied to me to some degree, or some of the time	Did not apply to me at all	Did not apply to me at all	Applied to me to a considerable degree or a good part of time	Applied to me to a considerable degree or a good part of time	Applied to me to a considerable degree or a good part of time	Did not apply to me at all	Did not apply to me at all	Did not apply to me at all	Did not apply to me at all	Applied to me to a considerable degree or a good part of time	Applied to me very much or most of the time	Applied to me to a considerable degree or a good part of time	Applied to me very much or most of the time	Applied to me to some degree, or some of the time	Applied to me very much or most of the time	Applied to me very much or most of the time	Did not apply to me at all	Applied to me to a considerable degree or a good part of time	Applied to me to some degree, or some of the time
23	Male	Medical	4	Former smoker	None	7	8	Not at all	Several days	More than half the days	Several days	Several days	Not at all	More than half the days	Several days	Several days	Applied to me to a considerable degree or a good part of time	Applied to me to a considerable degree or a good part of time	Did not apply to me at all	Did not apply to me at all	Applied to me to a considerable degree or a good part of time	Applied to me to a considerable degree or a good part of time	Applied to me to some degree, or some of the time	Applied to me very much or most of the time	Applied to me to some degree, or some of the time	Applied to me to a considerable degree or a good part of time	Applied to me to a considerable degree or a good part of time	Applied to me very much or most of the time	Did not apply to me at all	Applied to me very much or most of the time	Applied to me to some degree, or some of the time	Applied to me very much or most of the time	Did not apply to me at all	Applied to me very much or most of the time	Applied to me very much or most of the time	Applied to me very much or most of the time	Applied to me very much or most of the time
22	Male	Medical	3	Non-smoker	None	5	8	Nearly every day	Not at all	Several days	Not at all	Not at all	Not at all	Not at all	Not at all	Not at all	Did not apply to me at all	Did not apply to me at all	Did not apply to me at all	Did not apply to me at all	Did not apply to me at all	Did not apply to me at all	Did not apply to me at all	Did not apply to me at all	Did not apply to me at all	Did not apply to me at all	Did not apply to me at all	Did not apply to me at all	Did not apply to me at all	Did not apply to me at all	Did not apply to me at all	Did not apply to me at all	Did not apply to me at all	Did not apply to me at all	Did not apply to me at all	Did not apply to me at all	Did not apply to me at all
23	Male	Medical	4	Non-smoker	None	1	5	Not at all	Not at all	Not at all	Not at all	Not at all	Not at all	Not at all	Not at all	Not at all	Did not apply to me at all	Did not apply to me at all	Did not apply to me at all	Did not apply to me at all	Did not apply to me at all	Did not apply to me at all	Did not apply to me at all	Did not apply to me at all	Did not apply to me at all	Did not apply to me at all	Did not apply to me at all	Did not apply to me at all	Did not apply to me at all	Did not apply to me at all	Did not apply to me at all	Did not apply to me at all	Did not apply to me at all	Did not apply to me at all	Did not apply to me at all	Did not apply to me at all	Did not apply to me at all
23	Male	Medical	5	Current smoker	None	6	4	Several days	Several days	Several days	Several days	Several days	Several days	Several days	Several days	Several days	Applied to me very much or most of the time	Applied to me very much or most of the time	Applied to me to a considerable degree or a good part of time	Applied to me very much or most of the time	Applied to me very much or most of the time	Applied to me very much or most of the time	Applied to me very much or most of the time	Applied to me very much or most of the time	Applied to me very much or most of the time	Applied to me very much or most of the time	Applied to me very much or most of the time	Applied to me very much or most of the time	Applied to me very much or most of the time	Applied to me very much or most of the time	Applied to me very much or most of the time	Applied to me very much or most of the time	Applied to me to some degree, or some of the time	Applied to me very much or most of the time	Applied to me very much or most of the time	Applied to me very much or most of the time	Applied to me very much or most of the time
22	Female	Medical	4	Current smoker	Regular	7	5	More than half the days	Nearly every day	Not at all	Several days	Nearly every day	Several days	More than half the days	Several days	More than half the days	Applied to me to a considerable degree or a good part of time	Applied to me to some degree, or some of the time	Applied to me to a considerable degree or a good part of time	Applied to me to some degree, or some of the time	Applied to me to a considerable degree or a good part of time	Applied to me very much or most of the time	Applied to me to a considerable degree or a good part of time	Applied to me to a considerable degree or a good part of time	Applied to me very much or most of the time	Applied to me very much or most of the time	Applied to me to a considerable degree or a good part of time	Did not apply to me at all	Applied to me to some degree, or some of the time	Applied to me to a considerable degree or a good part of time	Applied to me very much or most of the time	Applied to me to a considerable degree or a good part of time	Applied to me very much or most of the time	Applied to me to a considerable degree or a good part of time	Applied to me to some degree, or some of the time	Applied to me to a considerable degree or a good part of time	Did not apply to me at all
21	Female	Non-medical	3	Non-smoker	None	8	6	Nearly every day	More than half the days	Nearly every day	Nearly every day	More than half the days	More than half the days	Nearly every day	Not at all	More than half the days	Applied to me to some degree, or some of the time	Applied to me to a considerable degree or a good part of time	Applied to me to a considerable degree or a good part of time	Applied to me to some degree, or some of the time	Applied to me to some degree, or some of the time	Applied to me to a considerable degree or a good part of time	Applied to me to some degree, or some of the time	Applied to me to a considerable degree or a good part of time	Applied to me to a considerable degree or a good part of time	Did not apply to me at all	Applied to me to some degree, or some of the time	Applied to me to a considerable degree or a good part of time	Applied to me very much or most of the time	Applied to me very much or most of the time	Applied to me to some degree, or some of the time	Applied to me to a considerable degree or a good part of time	Applied to me very much or most of the time	Did not apply to me at all	Applied to me to some degree, or some of the time	Applied to me to some degree, or some of the time	Applied to me to some degree, or some of the time
19	Male	Medical	2	Current smoker	Regular	1	1	Not at all	Several days	Nearly every day	Nearly every day	Nearly every day	Nearly every day	Nearly every day	Nearly every day	Nearly every day	Did not apply to me at all	Did not apply to me at all	Did not apply to me at all	Did not apply to me at all	Did not apply to me at all	Did not apply to me at all	Did not apply to me at all	Did not apply to me at all	Did not apply to me at all	Did not apply to me at all	Did not apply to me at all	Did not apply to me at all	Did not apply to me at all	Did not apply to me at all	Did not apply to me at all	Did not apply to me at all	Did not apply to me at all	Did not apply to me at all	Did not apply to me at all	Did not apply to me at all	Did not apply to me at all
23	Male	Non-medical	3	Non-smoker	None	1	6	Several days	Not at all	Several days	Several days	Several days	Not at all	Not at all	Not at all	Not at all	Did not apply to me at all	Applied to me to some degree, or some of the time	Did not apply to me at all	Did not apply to me at all	Did not apply to me at all	Applied to me to some degree, or some of the time	Did not apply to me at all	Applied to me to some degree, or some of the time	Did not apply to me at all	Did not apply to me at all	Did not apply to me at all	Did not apply to me at all	Applied to me to some degree, or some of the time	Did not apply to me at all	Did not apply to me at all	Did not apply to me at all	Did not apply to me at all	Did not apply to me at all	Applied to me to some degree, or some of the time	Did not apply to me at all	Did not apply to me at all
28	Female	Non-medical	4	Non-smoker	None	5	5	Several days	Several days	Not at all	Nearly every day	More than half the days	Not at all	More than half the days	Several days	Not at all	Did not apply to me at all	Did not apply to me at all	Applied to me to some degree, or some of the time	Applied to me to some degree, or some of the time	Applied to me to some degree, or some of the time	Did not apply to me at all	Did not apply to me at all	Applied to me to a considerable degree or a good part of time	Applied to me to some degree, or some of the time	Did not apply to me at all	Applied to me to some degree, or some of the time	Applied to me to some degree, or some of the time	Applied to me to some degree, or some of the time	Applied to me to some degree, or some of the time	Applied to me to some degree, or some of the time	Applied to me to some degree, or some of the time	Applied to me to some degree, or some of the time	Applied to me to some degree, or some of the time	Applied to me to a considerable degree or a good part of time	Did not apply to me at all	Applied to me to some degree, or some of the time
21	Female	Non-medical	1	Non-smoker	None	2	8	Nearly every day	Several days	Not at all	Several days	Not at all	Several days	Not at all	Not at all	Not at all	Did not apply to me at all	Did not apply to me at all	Did not apply to me at all	Applied to me to some degree, or some of the time	Did not apply to me at all	Applied to me to some degree, or some of the time	Did not apply to me at all	Did not apply to me at all	Did not apply to me at all	Did not apply to me at all	Did not apply to me at all	Did not apply to me at all	Applied to me to some degree, or some of the time	Did not apply to me at all	Did not apply to me at all	Did not apply to me at all	Did not apply to me at all	Applied to me to some degree, or some of the time	Applied to me to some degree, or some of the time	Did not apply to me at all	Did not apply to me at all
23	Male	Medical	5	Non-smoker	None	6	5	Nearly every day	Several days	More than half the days	Not at all	Not at all	More than half the days	Several days	Not at all	Not at all	Did not apply to me at all	Did not apply to me at all	Did not apply to me at all	Did not apply to me at all	Did not apply to me at all	Applied to me to some degree, or some of the time	Did not apply to me at all	Applied to me to some degree, or some of the time	Applied to me to some degree, or some of the time	Applied to me to some degree, or some of the time	Applied to me to some degree, or some of the time	Did not apply to me at all	Did not apply to me at all	Did not apply to me at all	Did not apply to me at all	Did not apply to me at all	Did not apply to me at all	Did not apply to me at all	Did not apply to me at all	Did not apply to me at all	Did not apply to me at all
22	Female	Medical	4	Non-smoker	None	5	8	Several days	Several days	Several days	Several days	More than half the days	Several days	Several days	Not at all	Not at all	Did not apply to me at all	Applied to me to some degree, or some of the time	Applied to me to some degree, or some of the time	Applied to me to some degree, or some of the time	Did not apply to me at all	Applied to me to some degree, or some of the time	Applied to me to some degree, or some of the time	Applied to me to some degree, or some of the time	Did not apply to me at all	Did not apply to me at all	Applied to me to some degree, or some of the time	Applied to me to some degree, or some of the time	Applied to me to some degree, or some of the time	Applied to me to some degree, or some of the time	Did not apply to me at all	Did not apply to me at all	Did not apply to me at all	Applied to me very much or most of the time	Applied to me to some degree, or some of the time	Applied to me to some degree, or some of the time	Did not apply to me at all
22	Female	Medical	4	Non-smoker	None	3	8	Several days	More than half the days	More than half the days	Nearly every day	Nearly every day	Nearly every day	Several days	Nearly every day	Not at all	Did not apply to me at all	Did not apply to me at all	Did not apply to me at all	Did not apply to me at all	Applied to me to some degree, or some of the time	Did not apply to me at all	Did not apply to me at all	Did not apply to me at all	Did not apply to me at all	Did not apply to me at all	Applied to me to some degree, or some of the time	Did not apply to me at all	Applied to me to some degree, or some of the time	Did not apply to me at all	Applied to me to some degree, or some of the time	Applied to me to some degree, or some of the time	Did not apply to me at all	Applied to me very much or most of the time	Did not apply to me at all	Did not apply to me at all	Did not apply to me at all
21	Female	Medical	4	Non-smoker	None	3	8	More than half the days	More than half the days	Several days	Several days	Not at all	More than half the days	Not at all	Not at all	Several days	Applied to me to some degree, or some of the time	Did not apply to me at all	Did not apply to me at all	Did not apply to me at all	Did not apply to me at all	Did not apply to me at all	Did not apply to me at all	Did not apply to me at all	Did not apply to me at all	Did not apply to me at all	Did not apply to me at all	Did not apply to me at all	Did not apply to me at all	Applied to me to some degree, or some of the time	Applied to me to some degree, or some of the time	Applied to me to some degree, or some of the time	Did not apply to me at all	Did not apply to me at all	Did not apply to me at all	Did not apply to me at all	Did not apply to me at all
22	Female	Medical	3	Current smoker	Occasional	7	4	Several days	Several days	Not at all	More than half the days	Not at all	Nearly every day	More than half the days	Nearly every day	Several days	Applied to me to some degree, or some of the time	Applied to me to a considerable degree or a good part of time	Applied to me to some degree, or some of the time	Applied to me to a considerable degree or a good part of time	Applied to me very much or most of the time	Did not apply to me at all	Applied to me very much or most of the time	Applied to me to some degree, or some of the time	Applied to me very much or most of the time	Did not apply to me at all	Did not apply to me at all	Did not apply to me at all	Applied to me to a considerable degree or a good part of time	Applied to me to some degree, or some of the time	Applied to me to a considerable degree or a good part of time	Did not apply to me at all	Applied to me very much or most of the time	Did not apply to me at all	Applied to me to some degree, or some of the time	Did not apply to me at all	Applied to me to some degree, or some of the time
26	Female	Non-medical	5	Former smoker	Occasional	3	3	Nearly every day	More than half the days	More than half the days	Several days	More than half the days	Several days	Not at all	Nearly every day	More than half the days	Did not apply to me at all	Applied to me to a considerable degree or a good part of time	Applied to me to some degree, or some of the time	Applied to me very much or most of the time	Applied to me very much or most of the time	Applied to me to a considerable degree or a good part of time	Did not apply to me at all	Did not apply to me at all	Applied to me to a considerable degree or a good part of time	Applied to me to some degree, or some of the time	Did not apply to me at all	Did not apply to me at all	Applied to me to some degree, or some of the time	Applied to me very much or most of the time	Applied to me to a considerable degree or a good part of time	Applied to me to a considerable degree or a good part of time	Did not apply to me at all	Applied to me to a considerable degree or a good part of time	Applied to me to a considerable degree or a good part of time	Applied to me to some degree, or some of the time	Applied to me very much or most of the time
23	Male	Medical	3	Non-smoker	None	5	6	Nearly every day	Several days	Several days	Several days	Several days	Several days	Several days	Several days	Several days	Applied to me to some degree, or some of the time	Applied to me to a considerable degree or a good part of time	Applied to me to a considerable degree or a good part of time	Applied to me to some degree, or some of the time	Applied to me to some degree, or some of the time	Applied to me to a considerable degree or a good part of time	Applied to me to a considerable degree or a good part of time	Applied to me to a considerable degree or a good part of time	Applied to me to some degree, or some of the time	Applied to me to some degree, or some of the time	Applied to me to some degree, or some of the time	Applied to me to some degree, or some of the time	Applied to me to a considerable degree or a good part of time	Applied to me to a considerable degree or a good part of time	Applied to me to some degree, or some of the time	Applied to me to some degree, or some of the time	Applied to me to some degree, or some of the time	Applied to me to some degree, or some of the time	Applied to me to some degree, or some of the time	Applied to me to a considerable degree or a good part of time	Applied to me to some degree, or some of the time
18	Female	Medical	1	Non-smoker	None	5	5	Not at all	Not at all	Several days	Several days	Not at all	Not at all	Not at all	Not at all	Not at all	Applied to me to some degree, or some of the time	Applied to me to some degree, or some of the time	Did not apply to me at all	Applied to me to some degree, or some of the time	Applied to me to some degree, or some of the time	Did not apply to me at all	Applied to me to some degree, or some of the time	Did not apply to me at all	Did not apply to me at all	Did not apply to me at all	Applied to me to some degree, or some of the time	Did not apply to me at all	Applied to me to some degree, or some of the time	Did not apply to me at all	Did not apply to me at all	Did not apply to me at all	Did not apply to me at all	Applied to me to some degree, or some of the time	Applied to me to some degree, or some of the time	Applied to me to some degree, or some of the time	Did not apply to me at all
22	Male	Medical	4	Non-smoker	None	3	5	Several days	Not at all	Several days	More than half the days	Several days	Not at all	Not at all	Not at all	Not at all	Did not apply to me at all	Applied to me to some degree, or some of the time	Did not apply to me at all	Applied to me to some degree, or some of the time	Applied to me to some degree, or some of the time	Did not apply to me at all	Applied to me to some degree, or some of the time	Did not apply to me at all	Did not apply to me at all	Did not apply to me at all	Did not apply to me at all	Applied to me to some degree, or some of the time	Applied to me to some degree, or some of the time	Did not apply to me at all	Did not apply to me at all	Applied to me to some degree, or some of the time	Did not apply to me at all	Did not apply to me at all	Applied to me to some degree, or some of the time	Did not apply to me at all	Did not apply to me at all
18	Female	Non-medical	1	Non-smoker	None	4	4	Several days	More than half the days	More than half the days	Nearly every day	More than half the days	More than half the days	Several days	Not at all	Not at all	Applied to me to some degree, or some of the time	Applied to me to a considerable degree or a good part of time	Applied to me very much or most of the time	Applied to me to some degree, or some of the time	Applied to me to a considerable degree or a good part of time	Applied to me very much or most of the time	Applied to me very much or most of the time	Applied to me to a considerable degree or a good part of time	Applied to me to a considerable degree or a good part of time	Applied to me to some degree, or some of the time	Applied to me to some degree, or some of the time	Applied to me to a considerable degree or a good part of time	Applied to me to some degree, or some of the time	Applied to me to some degree, or some of the time	Applied to me to a considerable degree or a good part of time	Applied to me to some degree, or some of the time	Applied to me to some degree, or some of the time	Applied to me to some degree, or some of the time	Applied to me very much or most of the time	Applied to me to a considerable degree or a good part of time	Applied to me to a considerable degree or a good part of time
22	Female	Medical	1	Non-smoker	None	9	6	More than half the days	Several days	Nearly every day	Nearly every day	More than half the days	More than half the days	Several days	Several days	Several days	Applied to me to some degree, or some of the time	Applied to me to some degree, or some of the time	Applied to me to a considerable degree or a good part of time	Applied to me to some degree, or some of the time	Applied to me to a considerable degree or a good part of time	Applied to me very much or most of the time	Applied to me to some degree, or some of the time	Applied to me to some degree, or some of the time	Applied to me very much or most of the time	Applied to me very much or most of the time	Applied to me very much or most of the time	Applied to me to a considerable degree or a good part of time	Applied to me to some degree, or some of the time	Applied to me to some degree, or some of the time	Applied to me to some degree, or some of the time	Applied to me to some degree, or some of the time	Applied to me very much or most of the time	Applied to me very much or most of the time	Applied to me to a considerable degree or a good part of time	Applied to me to some degree, or some of the time	Applied to me very much or most of the time
21	Female	Medical	4	Non-smoker	None	8	6	Not at all	More than half the days	Nearly every day	Not at all	Not at all	More than half the days	Several days	Not at all	Several days	Applied to me to some degree, or some of the time	Applied to me to some degree, or some of the time	Applied to me to some degree, or some of the time	Did not apply to me at all	Did not apply to me at all	Applied to me very much or most of the time	Applied to me very much or most of the time	Applied to me to a considerable degree or a good part of time	Applied to me to a considerable degree or a good part of time	Applied to me to a considerable degree or a good part of time	Applied to me to a considerable degree or a good part of time	Applied to me to a considerable degree or a good part of time	Applied to me to a considerable degree or a good part of time	Applied to me to a considerable degree or a good part of time	Applied to me to a considerable degree or a good part of time	Applied to me to a considerable degree or a good part of time	Applied to me to a considerable degree or a good part of time	Applied to me very much or most of the time	Applied to me to a considerable degree or a good part of time	Applied to me to some degree, or some of the time	Applied to me to some degree, or some of the time
21	Female	Medical	2	Non-smoker	None	1	2	Several days	Several days	Not at all	Several days	Several days	Several days	Several days	Several days	Several days	Did not apply to me at all	Did not apply to me at all	Did not apply to me at all	Did not apply to me at all	Applied to me to a considerable degree or a good part of time	Applied to me to a considerable degree or a good part of time	Applied to me to a considerable degree or a good part of time	Applied to me to some degree, or some of the time	Applied to me to some degree, or some of the time	Applied to me to some degree, or some of the time	Applied to me to a considerable degree or a good part of time	Applied to me to a considerable degree or a good part of time	Applied to me to a considerable degree or a good part of time	Applied to me to some degree, or some of the time	Applied to me to some degree, or some of the time	Applied to me to some degree, or some of the time	Did not apply to me at all	Did not apply to me at all	Applied to me to some degree, or some of the time	Applied to me to some degree, or some of the time	Applied to me very much or most of the time
23	Male	Medical	4	Non-smoker	None	5	8	Several days	Several days	Several days	Several days	Several days	Several days	Several days	Several days	Several days	Applied to me to some degree, or some of the time	Applied to me to some degree, or some of the time	Applied to me to some degree, or some of the time	Applied to me to a considerable degree or a good part of time	Applied to me to a considerable degree or a good part of time	Applied to me to a considerable degree or a good part of time	Applied to me to a considerable degree or a good part of time	Applied to me to some degree, or some of the time	Applied to me to a considerable degree or a good part of time	Applied to me to a considerable degree or a good part of time	Applied to me to some degree, or some of the time	Applied to me to a considerable degree or a good part of time	Applied to me to some degree, or some of the time	Applied to me to a considerable degree or a good part of time	Applied to me to a considerable degree or a good part of time	Applied to me to some degree, or some of the time	Applied to me to a considerable degree or a good part of time	Applied to me to some degree, or some of the time	Applied to me to a considerable degree or a good part of time	Applied to me to a considerable degree or a good part of time	Applied to me to a considerable degree or a good part of time
22	Male	Medical	4	Non-smoker	None	5	5	Several days	Several days	Several days	Not at all	Several days	Not at all	Several days	Not at all	Not at all	Applied to me to some degree, or some of the time	Applied to me to some degree, or some of the time	Applied to me to some degree, or some of the time	Applied to me to some degree, or some of the time	Applied to me to some degree, or some of the time	Applied to me to some degree, or some of the time	Applied to me to some degree, or some of the time	Applied to me to some degree, or some of the time	Applied to me to some degree, or some of the time	Applied to me to some degree, or some of the time	Applied to me to a considerable degree or a good part of time	Applied to me to some degree, or some of the time	Applied to me to some degree, or some of the time	Applied to me to some degree, or some of the time	Applied to me to some degree, or some of the time	Applied to me to some degree, or some of the time	Applied to me to some degree, or some of the time	Applied to me to some degree, or some of the time	Applied to me to some degree, or some of the time	Applied to me to some degree, or some of the time	Applied to me to some degree, or some of the time
26	Female	Medical	5	Non-smoker	None	6	8	Several days	Several days	Not at all	Not at all	Not at all	Not at all	Not at all	Not at all	Not at all	Did not apply to me at all	Did not apply to me at all	Applied to me to some degree, or some of the time	Did not apply to me at all	Applied to me to some degree, or some of the time	Did not apply to me at all	Did not apply to me at all	Did not apply to me at all	Did not apply to me at all	Did not apply to me at all	Did not apply to me at all	Did not apply to me at all	Applied to me to some degree, or some of the time	Did not apply to me at all	Did not apply to me at all	Applied to me to some degree, or some of the time	Did not apply to me at all	Applied to me to some degree, or some of the time	Did not apply to me at all	Did not apply to me at all	Did not apply to me at all
23	Male	Non-medical	1	Non-smoker	None	3	7	More than half the days	Several days	Not at all	Several days	Several days	Several days	Not at all	Not at all	Not at all	Did not apply to me at all	Did not apply to me at all	Did not apply to me at all	Did not apply to me at all	Applied to me to some degree, or some of the time	Did not apply to me at all	Did not apply to me at all	Did not apply to me at all	Applied to me to some degree, or some of the time	Did not apply to me at all	Did not apply to me at all	Applied to me to some degree, or some of the time	Applied to me to some degree, or some of the time	Did not apply to me at all	Did not apply to me at all	Did not apply to me at all	Applied to me to some degree, or some of the time	Applied to me to some degree, or some of the time	Did not apply to me at all	Did not apply to me at all	Did not apply to me at all
23	Male	Medical	5	Non-smoker	None	1	8	Not at all	Not at all	Not at all	Not at all	Not at all	Not at all	Not at all	Not at all	Not at all	Did not apply to me at all	Did not apply to me at all	Did not apply to me at all	Did not apply to me at all	Did not apply to me at all	Did not apply to me at all	Did not apply to me at all	Did not apply to me at all	Did not apply to me at all	Did not apply to me at all	Did not apply to me at all	Did not apply to me at all	Did not apply to me at all	Did not apply to me at all	Did not apply to me at all	Did not apply to me at all	Did not apply to me at all	Did not apply to me at all	Did not apply to me at all	Did not apply to me at all	Did not apply to me at all
22	Female	Medical	4	Non-smoker	None	8	5	Several days	Several days	Several days	More than half the days	More than half the days	Not at all	More than half the days	Several days	Not at all	Applied to me to some degree, or some of the time	Did not apply to me at all	Did not apply to me at all	Applied to me to a considerable degree or a good part of time	Applied to me to a considerable degree or a good part of time	Applied to me to some degree, or some of the time	Applied to me to a considerable degree or a good part of time	Applied to me to some degree, or some of the time	Applied to me to some degree, or some of the time	Did not apply to me at all	Applied to me to some degree, or some of the time	Applied to me to some degree, or some of the time	Applied to me to some degree, or some of the time	Applied to me to some degree, or some of the time	Applied to me to some degree, or some of the time	Applied to me to some degree, or some of the time	Did not apply to me at all	Applied to me to some degree, or some of the time	Applied to me to some degree, or some of the time	Applied to me to some degree, or some of the time	Applied to me to some degree, or some of the time
21	Male	Non-medical	3	Non-smoker	None	3	9	Several days	Not at all	Nearly every day	More than half the days	Several days	Not at all	Several days	Several days	Not at all	Applied to me to some degree, or some of the time	Applied to me to a considerable degree or a good part of time	Did not apply to me at all	Applied to me to a considerable degree or a good part of time	Did not apply to me at all	Applied to me to some degree, or some of the time	Applied to me very much or most of the time	Did not apply to me at all	Applied to me to some degree, or some of the time	Applied to me to some degree, or some of the time	Applied to me to a considerable degree or a good part of time	Applied to me to a considerable degree or a good part of time	Applied to me to a considerable degree or a good part of time	Applied to me to a considerable degree or a good part of time	Applied to me to some degree, or some of the time	Did not apply to me at all	Applied to me to some degree, or some of the time	Did not apply to me at all	Did not apply to me at all	Applied to me very much or most of the time	Applied to me to some degree, or some of the time
23	Female	Medical	4	Non-smoker	None	10	3	Several days	Nearly every day	More than half the days	Nearly every day	More than half the days	More than half the days	More than half the days	More than half the days	More than half the days	Applied to me to some degree, or some of the time	Applied to me to some degree, or some of the time	Applied to me to some degree, or some of the time	Applied to me to some degree, or some of the time	Applied to me to some degree, or some of the time	Applied to me to some degree, or some of the time	Applied to me to some degree, or some of the time	Applied to me to some degree, or some of the time	Applied to me to some degree, or some of the time	Applied to me to some degree, or some of the time	Applied to me to some degree, or some of the time	Applied to me to some degree, or some of the time	Applied to me to some degree, or some of the time	Applied to me to some degree, or some of the time	Applied to me to some degree, or some of the time	Applied to me to some degree, or some of the time	Applied to me to some degree, or some of the time	Applied to me to some degree, or some of the time	Applied to me to some degree, or some of the time	Applied to me to some degree, or some of the time	Applied to me to some degree, or some of the time
22	Male	Medical	4	Non-smoker	None	2	6	Several days	Not at all	Not at all	Not at all	Not at all	Not at all	Not at all	Not at all	Not at all	Did not apply to me at all	Did not apply to me at all	Did not apply to me at all	Did not apply to me at all	Did not apply to me at all	Did not apply to me at all	Did not apply to me at all	Did not apply to me at all	Did not apply to me at all	Did not apply to me at all	Did not apply to me at all	Applied to me to some degree, or some of the time	Did not apply to me at all	Applied to me to some degree, or some of the time	Did not apply to me at all	Did not apply to me at all	Did not apply to me at all	Did not apply to me at all	Did not apply to me at all	Did not apply to me at all	Did not apply to me at all
22	Male	Medical	4	Non-smoker	None	6	6	Not at all	Not at all	Not at all	Several days	Several days	Not at all	Not at all	Not at all	Not at all	Did not apply to me at all	Did not apply to me at all	Did not apply to me at all	Did not apply to me at all	Did not apply to me at all	Applied to me to some degree, or some of the time	Did not apply to me at all	Applied to me to some degree, or some of the time	Applied to me to some degree, or some of the time	Did not apply to me at all	Did not apply to me at all	Did not apply to me at all	Did not apply to me at all	Did not apply to me at all	Did not apply to me at all	Did not apply to me at all	Did not apply to me at all	Applied to me to some degree, or some of the time	Did not apply to me at all	Did not apply to me at all	Applied to me to some degree, or some of the time
20	Female	Medical	2	Non-smoker	None	6	7	More than half the days	More than half the days	Not at all	More than half the days	Not at all	Several days	Several days	Several days	Not at all	Did not apply to me at all	Applied to me to some degree, or some of the time	Applied to me to some degree, or some of the time	Did not apply to me at all	Applied to me to some degree, or some of the time	Applied to me to some degree, or some of the time	Did not apply to me at all	Applied to me to some degree, or some of the time	Applied to me to some degree, or some of the time	Applied to me to some degree, or some of the time	Applied to me to a considerable degree or a good part of time	Applied to me to a considerable degree or a good part of time	Applied to me to a considerable degree or a good part of time	Applied to me to some degree, or some of the time	Applied to me to some degree, or some of the time	Applied to me to some degree, or some of the time	Applied to me to some degree, or some of the time	Applied to me to some degree, or some of the time	Applied to me to a considerable degree or a good part of time	Applied to me to some degree, or some of the time	Applied to me to some degree, or some of the time
23	Female	Medical	5	Non-smoker	None	4	8	Not at all	Not at all	Nearly every day	Nearly every day	Several days	Not at all	Not at all	Not at all	Not at all	Applied to me to some degree, or some of the time	Applied to me to some degree, or some of the time	Did not apply to me at all	Did not apply to me at all	Did not apply to me at all	Applied to me to a considerable degree or a good part of time	Did not apply to me at all	Did not apply to me at all	Applied to me to some degree, or some of the time	Did not apply to me at all	Applied to me to some degree, or some of the time	Applied to me to a considerable degree or a good part of time	Applied to me to some degree, or some of the time	Applied to me to some degree, or some of the time	Did not apply to me at all	Did not apply to me at all	Did not apply to me at all	Applied to me to a considerable degree or a good part of time	Did not apply to me at all	Did not apply to me at all	Did not apply to me at all
17	Female	Medical	1	Non-smoker	None	3	4	Not at all	Not at all	More than half the days	Nearly every day	Not at all	Several days	Not at all	Not at all	Not at all	Applied to me to some degree, or some of the time	Did not apply to me at all	Did not apply to me at all	Did not apply to me at all	Applied to me to some degree, or some of the time	Applied to me to some degree, or some of the time	Did not apply to me at all	Did not apply to me at all	Applied to me to some degree, or some of the time	Did not apply to me at all	Did not apply to me at all	Did not apply to me at all	Did not apply to me at all	Applied to me to some degree, or some of the time	Did not apply to me at all	Did not apply to me at all	Did not apply to me at all	Applied to me to some degree, or some of the time	Did not apply to me at all	Did not apply to me at all	Did not apply to me at all
23	Female	Medical	4	Non-smoker	None	5	6	Several days	Several days	Several days	Several days	Not at all	Several days	Several days	Several days	Several days	Applied to me very much or most of the time	Applied to me very much or most of the time	Applied to me to a considerable degree or a good part of time	Did not apply to me at all	Applied to me to some degree, or some of the time	Applied to me very much or most of the time	Applied to me to a considerable degree or a good part of time	Applied to me very much or most of the time	Applied to me to a considerable degree or a good part of time	Applied to me to a considerable degree or a good part of time	Applied to me very much or most of the time	Applied to me to some degree, or some of the time	Applied to me very much or most of the time	Applied to me very much or most of the time	Applied to me to some degree, or some of the time	Applied to me to a considerable degree or a good part of time	Applied to me to a considerable degree or a good part of time	Applied to me very much or most of the time	Applied to me very much or most of the time	Applied to me very much or most of the time	Applied to me very much or most of the time
20	Female	Non-medical	3	Non-smoker	None	6	5	Several days	Several days	Several days	More than half the days	Nearly every day	More than half the days	Not at all	Several days	Several days	Did not apply to me at all	Applied to me to some degree, or some of the time	Applied to me to some degree, or some of the time	Applied to me to some degree, or some of the time	Applied to me very much or most of the time	Applied to me to a considerable degree or a good part of time	Applied to me to some degree, or some of the time	Applied to me to some degree, or some of the time	Applied to me to a considerable degree or a good part of time	Applied to me very much or most of the time	Applied to me very much or most of the time	Applied to me very much or most of the time	Applied to me to some degree, or some of the time	Did not apply to me at all	Applied to me to some degree, or some of the time	Did not apply to me at all	Applied to me very much or most of the time	Applied to me very much or most of the time	Applied to me very much or most of the time	Applied to me very much or most of the time	Applied to me very much or most of the time
20	Male	Medical	3	Non-smoker	None	10	6	Not at all	More than half the days	Nearly every day	Nearly every day	Nearly every day	Nearly every day	Nearly every day	Nearly every day	Nearly every day	Applied to me to some degree, or some of the time	Applied to me very much or most of the time	Applied to me very much or most of the time	Did not apply to me at all	Applied to me very much or most of the time	Did not apply to me at all	Did not apply to me at all	Applied to me very much or most of the time	Applied to me very much or most of the time	Applied to me very much or most of the time	Applied to me very much or most of the time	Applied to me very much or most of the time	Applied to me very much or most of the time	Applied to me very much or most of the time	Did not apply to me at all	Applied to me very much or most of the time	Applied to me very much or most of the time	Applied to me very much or most of the time	Did not apply to me at all	Did not apply to me at all	Applied to me very much or most of the time
19	Female	Medical	2	Non-smoker	None	3	6	Several days	Several days	Not at all	Several days	Several days	Several days	Not at all	Not at all	Several days	Did not apply to me at all	Did not apply to me at all	Applied to me to some degree, or some of the time	Did not apply to me at all	Did not apply to me at all	Did not apply to me at all	Did not apply to me at all	Did not apply to me at all	Did not apply to me at all	Did not apply to me at all	Did not apply to me at all	Did not apply to me at all	Did not apply to me at all	Did not apply to me at all	Did not apply to me at all	Did not apply to me at all	Did not apply to me at all	Did not apply to me at all	Did not apply to me at all	Did not apply to me at all	Did not apply to me at all
20	Female	Medical	4	Non-smoker	None	1	6	Not at all	Several days	Not at all	Several days	Not at all	Several days	Not at all	Not at all	Several days	Did not apply to me at all	Applied to me to a considerable degree or a good part of time	Applied to me to some degree, or some of the time	Did not apply to me at all	Did not apply to me at all	Did not apply to me at all	Applied to me to some degree, or some of the time	Applied to me to some degree, or some of the time	Did not apply to me at all	Did not apply to me at all	Did not apply to me at all	Applied to me very much or most of the time	Applied to me to some degree, or some of the time	Did not apply to me at all	Applied to me to some degree, or some of the time	Applied to me to some degree, or some of the time	Applied to me very much or most of the time	Applied to me to a considerable degree or a good part of time	Applied to me to some degree, or some of the time	Applied to me to some degree, or some of the time	Applied to me to some degree, or some of the time
23	Male	Medical	3	Non-smoker	Occasional	5	6	More than half the days	Not at all	More than half the days	More than half the days	Nearly every day	More than half the days	More than half the days	More than half the days	Several days	Applied to me to some degree, or some of the time	Applied to me to a considerable degree or a good part of time	Applied to me to a considerable degree or a good part of time	Applied to me to a considerable degree or a good part of time	Applied to me to some degree, or some of the time	Applied to me to a considerable degree or a good part of time	Applied to me to a considerable degree or a good part of time	Applied to me to some degree, or some of the time	Applied to me to some degree, or some of the time	Applied to me very much or most of the time	Did not apply to me at all	Applied to me to a considerable degree or a good part of time	Did not apply to me at all	Applied to me very much or most of the time	Applied to me to a considerable degree or a good part of time	Applied to me very much or most of the time	Applied to me to a considerable degree or a good part of time	Applied to me to a considerable degree or a good part of time	Did not apply to me at all	Did not apply to me at all	Did not apply to me at all
20	Female	Medical	4	Non-smoker	None	7	6	More than half the days	Several days	Several days	More than half the days	More than half the days	More than half the days	Not at all	Not at all	More than half the days	Applied to me to some degree, or some of the time	Applied to me to some degree, or some of the time	Applied to me to some degree, or some of the time	Applied to me to some degree, or some of the time	Did not apply to me at all	Applied to me to some degree, or some of the time	Applied to me to some degree, or some of the time	Applied to me to some degree, or some of the time	Applied to me to some degree, or some of the time	Did not apply to me at all	Applied to me to some degree, or some of the time	Applied to me very much or most of the time	Applied to me very much or most of the time	Applied to me to some degree, or some of the time	Applied to me to some degree, or some of the time	Applied to me to some degree, or some of the time	Did not apply to me at all	Applied to me very much or most of the time	Applied to me to some degree, or some of the time	Applied to me to some degree, or some of the time	Applied to me to some degree, or some of the time
21	Male	Medical	3	Non-smoker	None	1	8	Several days	Not at all	Not at all	Not at all	Not at all	Not at all	Not at all	Not at all	Not at all	Did not apply to me at all	Did not apply to me at all	Did not apply to me at all	Did not apply to me at all	Did not apply to me at all	Did not apply to me at all	Did not apply to me at all	Did not apply to me at all	Did not apply to me at all	Did not apply to me at all	Did not apply to me at all	Did not apply to me at all	Did not apply to me at all	Did not apply to me at all	Did not apply to me at all	Did not apply to me at all	Did not apply to me at all	Did not apply to me at all	Did not apply to me at all	Did not apply to me at all	Did not apply to me at all
23	Male	Medical	4	Former smoker	Occasional	2	4	Not at all	More than half the days	Several days	Nearly every day	More than half the days	Several days	Several days	Several days	Several days	Did not apply to me at all	Applied to me to a considerable degree or a good part of time	Applied to me to some degree, or some of the time	Applied to me to some degree, or some of the time	Applied to me to some degree, or some of the time	Applied to me to some degree, or some of the time	Applied to me to a considerable degree or a good part of time	Did not apply to me at all	Applied to me very much or most of the time	Applied to me to a considerable degree or a good part of time	Applied to me to some degree, or some of the time	Did not apply to me at all	Applied to me very much or most of the time	Did not apply to me at all	Applied to me very much or most of the time	Did not apply to me at all	Did not apply to me at all	Applied to me very much or most of the time	Applied to me very much or most of the time	Applied to me to a considerable degree or a good part of time	Applied to me to some degree, or some of the time
28	Male	Medical	4	Non-smoker	None	5	6	More than half the days	Several days	More than half the days	Nearly every day	More than half the days	Nearly every day	Nearly every day	More than half the days	Nearly every day	Did not apply to me at all	Applied to me to a considerable degree or a good part of time	Applied to me to a considerable degree or a good part of time	Applied to me to a considerable degree or a good part of time	Applied to me to some degree, or some of the time	Applied to me to some degree, or some of the time	Applied to me very much or most of the time	Did not apply to me at all	Applied to me to a considerable degree or a good part of time	Applied to me to some degree, or some of the time	Did not apply to me at all	Applied to me to some degree, or some of the time	Applied to me to a considerable degree or a good part of time	Did not apply to me at all	Applied to me very much or most of the time	Applied to me to some degree, or some of the time	Applied to me to some degree, or some of the time	Applied to me to a considerable degree or a good part of time	Applied to me very much or most of the time	Applied to me to a considerable degree or a good part of time	Applied to me to some degree, or some of the time
20	Female	Medical	3	Non-smoker	None	4	6	Not at all	Not at all	Not at all	Several days	Several days	Not at all	Not at all	Several days	Not at all	Did not apply to me at all	Applied to me to a considerable degree or a good part of time	Did not apply to me at all	Did not apply to me at all	Applied to me to some degree, or some of the time	Did not apply to me at all	Did not apply to me at all	Did not apply to me at all	Did not apply to me at all	Did not apply to me at all	Did not apply to me at all	Did not apply to me at all	Did not apply to me at all	Did not apply to me at all	Did not apply to me at all	Did not apply to me at all	Did not apply to me at all	Applied to me to some degree, or some of the time	Did not apply to me at all	Did not apply to me at all	Did not apply to me at all
20	Male	Medical	4	Non-smoker	None	6	6	More than half the days	Several days	Several days	More than half the days	Several days	Not at all	Several days	Several days	Several days	Did not apply to me at all	Applied to me to some degree, or some of the time	Did not apply to me at all	Applied to me very much or most of the time	Applied to me to some degree, or some of the time	Applied to me to some degree, or some of the time	Applied to me to some degree, or some of the time	Applied to me to some degree, or some of the time	Applied to me to some degree, or some of the time	Did not apply to me at all	Applied to me to some degree, or some of the time	Applied to me to some degree, or some of the time	Did not apply to me at all	Did not apply to me at all	Applied to me to some degree, or some of the time	Did not apply to me at all	Did not apply to me at all	Applied to me to some degree, or some of the time	Applied to me to some degree, or some of the time	Did not apply to me at all	Did not apply to me at all
20	Female	Non-medical	1	Non-smoker	None	2	10	More than half the days	Several days	More than half the days	Nearly every day	More than half the days	Several days	Several days	More than half the days	Several days	Did not apply to me at all	Applied to me to some degree, or some of the time	Applied to me to some degree, or some of the time	Applied to me to a considerable degree or a good part of time	Applied to me to some degree, or some of the time	Applied to me to a considerable degree or a good part of time	Applied to me to some degree, or some of the time	Applied to me to a considerable degree or a good part of time	Applied to me to some degree, or some of the time	Did not apply to me at all	Applied to me to some degree, or some of the time	Did not apply to me at all	Did not apply to me at all	Did not apply to me at all	Did not apply to me at all	Applied to me to some degree, or some of the time	Did not apply to me at all	Applied to me very much or most of the time	Applied to me very much or most of the time	Applied to me very much or most of the time	Applied to me to some degree, or some of the time
23	Male	Medical	4	Non-smoker	None	5	7	Several days	Not at all	Several days	Not at all	Several days	Several days	Not at all	More than half the days	Several days	Applied to me to some degree, or some of the time	Applied to me to a considerable degree or a good part of time	Did not apply to me at all	Applied to me to some degree, or some of the time	Applied to me very much or most of the time	Applied to me to some degree, or some of the time	Applied to me to a considerable degree or a good part of time	Applied to me to a considerable degree or a good part of time	Applied to me to a considerable degree or a good part of time	Applied to me to some degree, or some of the time	Applied to me to a considerable degree or a good part of time	Applied to me to some degree, or some of the time	Applied to me to a considerable degree or a good part of time	Applied to me to some degree, or some of the time	Applied to me to some degree, or some of the time	Applied to me to a considerable degree or a good part of time	Applied to me to some degree, or some of the time	Applied to me to a considerable degree or a good part of time	Applied to me to a considerable degree or a good part of time	Applied to me to some degree, or some of the time	Applied to me to some degree, or some of the time
22	Female	Medical	4	Non-smoker	None	6	6	Several days	More than half the days	Nearly every day	Nearly every day	More than half the days	Nearly every day	More than half the days	Several days	Not at all	Applied to me to some degree, or some of the time	Applied to me to a considerable degree or a good part of time	Applied to me to some degree, or some of the time	Applied to me to some degree, or some of the time	Applied to me to some degree, or some of the time	Applied to me to a considerable degree or a good part of time	Applied to me to a considerable degree or a good part of time	Applied to me to some degree, or some of the time	Applied to me to some degree, or some of the time	Applied to me to some degree, or some of the time	Applied to me to some degree, or some of the time	Applied to me to some degree, or some of the time	Applied to me to some degree, or some of the time	Applied to me to some degree, or some of the time	Applied to me to a considerable degree or a good part of time	Applied to me to some degree, or some of the time	Applied to me to some degree, or some of the time	Applied to me to some degree, or some of the time	Did not apply to me at all	Applied to me to some degree, or some of the time	Applied to me to some degree, or some of the time
23	Female	Medical	4	Non-smoker	None	5	7	More than half the days	Not at all	Not at all	Several days	Not at all	Not at all	Not at all	Not at all	Not at all	Applied to me to some degree, or some of the time	Did not apply to me at all	Applied to me to some degree, or some of the time	Did not apply to me at all	Applied to me to some degree, or some of the time	Applied to me to some degree, or some of the time	Did not apply to me at all	Applied to me to some degree, or some of the time	Did not apply to me at all	Did not apply to me at all	Applied to me to some degree, or some of the time	Applied to me to some degree, or some of the time	Applied to me to some degree, or some of the time	Applied to me to some degree, or some of the time	Did not apply to me at all	Applied to me to some degree, or some of the time	Applied to me to some degree, or some of the time	Applied to me to some degree, or some of the time	Applied to me to some degree, or some of the time	Did not apply to me at all	Did not apply to me at all
24	Male	Non-medical	4	Non-smoker	None	10	4	More than half the days	Not at all	Not at all	Not at all	Not at all	Not at all	Not at all	Not at all	Not at all	Applied to me to a considerable degree or a good part of time	Applied to me to some degree, or some of the time	Applied to me to some degree, or some of the time	Applied to me to some degree, or some of the time	Applied to me to a considerable degree or a good part of time	Applied to me to a considerable degree or a good part of time	Applied to me to a considerable degree or a good part of time	Applied to me to some degree, or some of the time	Applied to me to some degree, or some of the time	Applied to me to some degree, or some of the time	Did not apply to me at all	Applied to me to some degree, or some of the time	Applied to me very much or most of the time	Applied to me to some degree, or some of the time	Applied to me to a considerable degree or a good part of time	Applied to me to a considerable degree or a good part of time	Applied to me to a considerable degree or a good part of time	Applied to me to a considerable degree or a good part of time	Applied to me very much or most of the time	Applied to me to a considerable degree or a good part of time	Did not apply to me at all
28	Female	Non-medical	5	Non-smoker	None	10	7	Not at all	Several days	Several days	Several days	Nearly every day	Not at all	Nearly every day	More than half the days	Nearly every day	Did not apply to me at all	Applied to me to a considerable degree or a good part of time	Applied to me to some degree, or some of the time	Did not apply to me at all	Applied to me to some degree, or some of the time	Applied to me very much or most of the time	Did not apply to me at all	Applied to me very much or most of the time	Applied to me to some degree, or some of the time	Did not apply to me at all	Applied to me to a considerable degree or a good part of time	Did not apply to me at all	Applied to me to a considerable degree or a good part of time	Did not apply to me at all	Applied to me to a considerable degree or a good part of time	Did not apply to me at all	Did not apply to me at all	Applied to me to some degree, or some of the time	Applied to me to some degree, or some of the time	Applied to me to some degree, or some of the time	Applied to me to some degree, or some of the time
19	Male	Non-medical	1	Non-smoker	Regular	7	5	Several days	Several days	Several days	Several days	Several days	Several days	Several days	Several days	Several days	Did not apply to me at all	Applied to me very much or most of the time	Applied to me very much or most of the time	Applied to me very much or most of the time	Applied to me very much or most of the time	Applied to me very much or most of the time	Applied to me very much or most of the time	Applied to me very much or most of the time	Applied to me very much or most of the time	Applied to me very much or most of the time	Applied to me very much or most of the time	Applied to me very much or most of the time	Applied to me very much or most of the time	Applied to me very much or most of the time	Applied to me to a considerable degree or a good part of time	Applied to me very much or most of the time	Applied to me very much or most of the time	Applied to me very much or most of the time	Applied to me very much or most of the time	Applied to me very much or most of the time	Applied to me very much or most of the time
22	Male	Non-medical	1	Non-smoker	Regular	6	6	Not at all	Several days	Not at all	Several days	Not at all	Several days	More than half the days	More than half the days	Not at all	Applied to me to a considerable degree or a good part of time	Applied to me to a considerable degree or a good part of time	Did not apply to me at all	Applied to me to some degree, or some of the time	Applied to me to some degree, or some of the time	Applied to me to a considerable degree or a good part of time	Applied to me to some degree, or some of the time	Did not apply to me at all	Applied to me to some degree, or some of the time	Applied to me to a considerable degree or a good part of time	Applied to me to a considerable degree or a good part of time	Applied to me to some degree, or some of the time	Applied to me very much or most of the time	Applied to me to a considerable degree or a good part of time	Did not apply to me at all	Applied to me very much or most of the time	Applied to me to some degree, or some of the time	Applied to me to a considerable degree or a good part of time	Applied to me to a considerable degree or a good part of time	Applied to me very much or most of the time	Applied to me very much or most of the time
22	Male	Medical	3	Non-smoker	None	5	10	Several days	Several days	Several days	Several days	Several days	Several days	Several days	Several days	Several days	Applied to me to some degree, or some of the time	Applied to me to some degree, or some of the time	Applied to me to some degree, or some of the time	Applied to me to some degree, or some of the time	Did not apply to me at all	Applied to me to some degree, or some of the time	Applied to me to some degree, or some of the time	Applied to me to some degree, or some of the time	Applied to me to some degree, or some of the time	Applied to me to some degree, or some of the time	Applied to me to some degree, or some of the time	Applied to me to some degree, or some of the time	Applied to me to some degree, or some of the time	Applied to me to some degree, or some of the time	Applied to me to some degree, or some of the time	Applied to me to some degree, or some of the time	Applied to me to some degree, or some of the time	Applied to me to some degree, or some of the time	Applied to me to some degree, or some of the time	Applied to me to some degree, or some of the time	Applied to me to some degree, or some of the time
23	Female	Medical	4	Non-smoker	None	9	6	Several days	Several days	Several days	Several days	Several days	Not at all	More than half the days	Not at all	Not at all	Applied to me to some degree, or some of the time	Applied to me to some degree, or some of the time	Applied to me to some degree, or some of the time	Did not apply to me at all	Applied to me to some degree, or some of the time	Applied to me to some degree, or some of the time	Did not apply to me at all	Did not apply to me at all	Applied to me to some degree, or some of the time	Did not apply to me at all	Applied to me to some degree, or some of the time	Did not apply to me at all	Did not apply to me at all	Did not apply to me at all	Did not apply to me at all	Did not apply to me at all	Did not apply to me at all	Did not apply to me at all	Did not apply to me at all	Did not apply to me at all	Did not apply to me at all
25	Female	Medical	4	Non-smoker	None	7	5	Not at all	More than half the days	More than half the days	More than half the days	Several days	More than half the days	Not at all	Not at all	Not at all	Applied to me to some degree, or some of the time	Applied to me to some degree, or some of the time	Did not apply to me at all	Did not apply to me at all	Applied to me to some degree, or some of the time	Applied to me to some degree, or some of the time	Applied to me to some degree, or some of the time	Did not apply to me at all	Did not apply to me at all	Applied to me to some degree, or some of the time	Applied to me to some degree, or some of the time	Applied to me to some degree, or some of the time	Applied to me to some degree, or some of the time	Applied to me to some degree, or some of the time	Applied to me to some degree, or some of the time	Applied to me to some degree, or some of the time	Applied to me to some degree, or some of the time	Applied to me to some degree, or some of the time	Applied to me to some degree, or some of the time	Applied to me to some degree, or some of the time	Applied to me to some degree, or some of the time
22	Female	Medical	4	Non-smoker	None	1	4	Several days	More than half the days	More than half the days	More than half the days	More than half the days	Not at all	Not at all	Not at all	Not at all	Did not apply to me at all	Did not apply to me at all	Did not apply to me at all	Did not apply to me at all	Did not apply to me at all	Did not apply to me at all	Did not apply to me at all	Did not apply to me at all	Did not apply to me at all	Did not apply to me at all	Did not apply to me at all	Did not apply to me at all	Did not apply to me at all	Did not apply to me at all	Did not apply to me at all	Did not apply to me at all	Did not apply to me at all	Did not apply to me at all	Did not apply to me at all	Did not apply to me at all	Did not apply to me at all
25	Male	Medical	4	Non-smoker	None	1	7	Several days	Not at all	Not at all	Not at all	Several days	Not at all	Not at all	Not at all	Not at all	Did not apply to me at all	Did not apply to me at all	Did not apply to me at all	Did not apply to me at all	Did not apply to me at all	Did not apply to me at all	Did not apply to me at all	Did not apply to me at all	Did not apply to me at all	Did not apply to me at all	Did not apply to me at all	Did not apply to me at all	Did not apply to me at all	Did not apply to me at all	Did not apply to me at all	Did not apply to me at all	Did not apply to me at all	Did not apply to me at all	Did not apply to me at all	Did not apply to me at all	Did not apply to me at all
28	Female	Non-medical	5	Non-smoker	None	3	8	Several days	More than half the days	Not at all	More than half the days	Not at all	Several days	Not at all	Not at all	Not at all	Did not apply to me at all	Applied to me to some degree, or some of the time	Did not apply to me at all	Applied to me to some degree, or some of the time	Did not apply to me at all	Applied to me to some degree, or some of the time	Did not apply to me at all	Did not apply to me at all	Applied to me to some degree, or some of the time	Did not apply to me at all	Applied to me to some degree, or some of the time	Did not apply to me at all	Applied to me to some degree, or some of the time	Did not apply to me at all	Did not apply to me at all	Did not apply to me at all	Did not apply to me at all	Applied to me to some degree, or some of the time	Applied to me to a considerable degree or a good part of time	Did not apply to me at all	Did not apply to me at all
18	Female	Medical	2	Non-smoker	None	4	9	Several days	Several days	More than half the days	Nearly every day	Several days	Not at all	More than half the days	Not at all	Several days	Did not apply to me at all	Applied to me to some degree, or some of the time	Did not apply to me at all	Applied to me to some degree, or some of the time	Did not apply to me at all	Did not apply to me at all	Did not apply to me at all	Did not apply to me at all	Did not apply to me at all	Did not apply to me at all	Did not apply to me at all	Applied to me to some degree, or some of the time	Did not apply to me at all	Did not apply to me at all	Did not apply to me at all	Did not apply to me at all	Did not apply to me at all	Did not apply to me at all	Did not apply to me at all	Did not apply to me at all	Did not apply to me at all
23	Male	Medical	4	Non-smoker	None	4	10	Not at all	Several days	More than half the days	More than half the days	More than half the days	Several days	Several days	Several days	Not at all	Did not apply to me at all	Did not apply to me at all	Did not apply to me at all	Did not apply to me at all	Applied to me to some degree, or some of the time	Applied to me to some degree, or some of the time	Did not apply to me at all	Did not apply to me at all	Applied to me to some degree, or some of the time	Did not apply to me at all	Applied to me to some degree, or some of the time	Did not apply to me at all	Applied to me to some degree, or some of the time	Applied to me to some degree, or some of the time	Did not apply to me at all	Did not apply to me at all	Did not apply to me at all	Applied to me to some degree, or some of the time	Did not apply to me at all	Did not apply to me at all	Did not apply to me at all
22	Male	Medical	3	Non-smoker	None	7	7	More than half the days	Several days	Several days	Several days	More than half the days	Several days	Several days	Not at all	Not at all	Applied to me to some degree, or some of the time	Applied to me to some degree, or some of the time	Applied to me to some degree, or some of the time	Did not apply to me at all	Applied to me to some degree, or some of the time	Applied to me to some degree, or some of the time	Did not apply to me at all	Did not apply to me at all	Did not apply to me at all	Applied to me to some degree, or some of the time	Applied to me to some degree, or some of the time	Applied to me to some degree, or some of the time	Applied to me to a considerable degree or a good part of time	Did not apply to me at all	Did not apply to me at all	Did not apply to me at all	Applied to me to some degree, or some of the time	Applied to me to a considerable degree or a good part of time	Did not apply to me at all	Applied to me to some degree, or some of the time	Applied to me to some degree, or some of the time
16	Female	Medical	2	Non-smoker	None	1	6	Several days	Not at all	Not at all	Not at all	Not at all	Several days	Not at all	Not at all	Not at all	Did not apply to me at all	Did not apply to me at all	Applied to me to some degree, or some of the time	Did not apply to me at all	Did not apply to me at all	Did not apply to me at all	Did not apply to me at all	Applied to me to some degree, or some of the time	Did not apply to me at all	Did not apply to me at all	Applied to me to a considerable degree or a good part of time	Did not apply to me at all	Did not apply to me at all	Did not apply to me at all	Did not apply to me at all	Did not apply to me at all	Applied to me to some degree, or some of the time	Did not apply to me at all	Did not apply to me at all	Did not apply to me at all	Did not apply to me at all
21	Male	Medical	4	Non-smoker	None	5	4	Several days	Several days	Not at all	Not at all	Not at all	Several days	More than half the days	Not at all	Several days	Did not apply to me at all	Did not apply to me at all	Did not apply to me at all	Did not apply to me at all	Applied to me to some degree, or some of the time	Did not apply to me at all	Applied to me to some degree, or some of the time	Applied to me to a considerable degree or a good part of time	Applied to me to a considerable degree or a good part of time	Applied to me to some degree, or some of the time	Did not apply to me at all	Did not apply to me at all	Applied to me to some degree, or some of the time	Did not apply to me at all	Did not apply to me at all	Applied to me to some degree, or some of the time	Applied to me to some degree, or some of the time	Applied to me to some degree, or some of the time	Did not apply to me at all	Did not apply to me at all	Applied to me to some degree, or some of the time
19	Female	Medical	1	Non-smoker	None	1	10	Nearly every day	Not at all	Not at all	Nearly every day	Not at all	Not at all	Nearly every day	Not at all	Not at all	Did not apply to me at all	Did not apply to me at all	Applied to me to a considerable degree or a good part of time	Did not apply to me at all	Applied to me to some degree, or some of the time	Did not apply to me at all	Did not apply to me at all	Applied to me very much or most of the time	Applied to me to a considerable degree or a good part of time	Applied to me to some degree, or some of the time	Did not apply to me at all	Applied to me to some degree, or some of the time	Applied to me to some degree, or some of the time	Applied to me to a considerable degree or a good part of time	Applied to me to some degree, or some of the time	Applied to me to some degree, or some of the time	Applied to me to some degree, or some of the time	Applied to me to some degree, or some of the time	Applied to me to some degree, or some of the time	Applied to me to a considerable degree or a good part of time	Applied to me to a considerable degree or a good part of time
20	Female	Medical	3	Non-smoker	None	8	7	Not at all	Several days	Several days	More than half the days	Not at all	Not at all	Not at all	Several days	Not at all	Applied to me to some degree, or some of the time	Applied to me very much or most of the time	Applied to me to some degree, or some of the time	Did not apply to me at all	Applied to me to some degree, or some of the time	Applied to me to some degree, or some of the time	Applied to me to some degree, or some of the time	Applied to me to some degree, or some of the time	Did not apply to me at all	Did not apply to me at all	Did not apply to me at all	Applied to me to some degree, or some of the time	Applied to me to a considerable degree or a good part of time	Did not apply to me at all	Applied to me to some degree, or some of the time	Applied to me to some degree, or some of the time	Applied to me to a considerable degree or a good part of time	Did not apply to me at all	Applied to me to a considerable degree or a good part of time	Did not apply to me at all	Applied to me to a considerable degree or a good part of time
23	Female	Medical	3	Non-smoker	None	3	6	Several days	Nearly every day	Several days	Several days	Not at all	Several days	Nearly every day	Nearly every day	Not at all	Did not apply to me at all	Applied to me very much or most of the time	Applied to me to some degree, or some of the time	Applied to me very much or most of the time	Applied to me to some degree, or some of the time	Applied to me very much or most of the time	Applied to me very much or most of the time	Did not apply to me at all	Did not apply to me at all	Applied to me very much or most of the time	Did not apply to me at all	Did not apply to me at all	Applied to me very much or most of the time	Applied to me to a considerable degree or a good part of time	Applied to me to a considerable degree or a good part of time	Applied to me to some degree, or some of the time	Applied to me very much or most of the time	Did not apply to me at all	Applied to me to some degree, or some of the time	Applied to me to a considerable degree or a good part of time	Applied to me to a considerable degree or a good part of time
21	Female	Medical	3	Non-smoker	None	4	8	Several days	Not at all	Several days	More than half the days	Not at all	Not at all	Not at all	More than half the days	Not at all	Did not apply to me at all	Did not apply to me at all	Did not apply to me at all	Did not apply to me at all	Did not apply to me at all	Did not apply to me at all	Did not apply to me at all	Did not apply to me at all	Did not apply to me at all	Did not apply to me at all	Did not apply to me at all	Did not apply to me at all	Did not apply to me at all	Did not apply to me at all	Did not apply to me at all	Did not apply to me at all	Did not apply to me at all	Did not apply to me at all	Did not apply to me at all	Did not apply to me at all	Did not apply to me at all
19	Female	Medical	3	Non-smoker	None	5	8	More than half the days	Several days	Not at all	More than half the days	Several days	Not at all	Not at all	Several days	Several days	Applied to me very much or most of the time	Applied to me very much or most of the time	Applied to me to some degree, or some of the time	Did not apply to me at all	Applied to me to some degree, or some of the time	Applied to me to a considerable degree or a good part of time	Applied to me to a considerable degree or a good part of time	Applied to me very much or most of the time	Applied to me very much or most of the time	Applied to me to a considerable degree or a good part of time	Did not apply to me at all	Applied to me to some degree, or some of the time	Applied to me to some degree, or some of the time	Applied to me to a considerable degree or a good part of time	Applied to me to some degree, or some of the time	Applied to me to some degree, or some of the time	Applied to me very much or most of the time	Applied to me to a considerable degree or a good part of time	Applied to me to a considerable degree or a good part of time	Applied to me to a considerable degree or a good part of time	Applied to me to a considerable degree or a good part of time
20	Female	Medical	3	Non-smoker	None	7	8	Several days	Several days	Not at all	More than half the days	Several days	More than half the days	Not at all	Not at all	Not at all	Applied to me to some degree, or some of the time	Applied to me to some degree, or some of the time	Applied to me to some degree, or some of the time	Applied to me to some degree, or some of the time	Applied to me to some degree, or some of the time	Applied to me to some degree, or some of the time	Applied to me very much or most of the time	Applied to me very much or most of the time	Applied to me very much or most of the time	Applied to me very much or most of the time	Applied to me very much or most of the time	Applied to me to a considerable degree or a good part of time	Applied to me to a considerable degree or a good part of time	Applied to me to some degree, or some of the time	Applied to me very much or most of the time	Applied to me to a considerable degree or a good part of time	Applied to me very much or most of the time	Applied to me very much or most of the time	Applied to me very much or most of the time	Applied to me to a considerable degree or a good part of time	Applied to me to a considerable degree or a good part of time
22	Male	Medical	4	Current smoker	None	9	4	Several days	Not at all	Several days	Several days	More than half the days	Nearly every day	Not at all	Not at all	Not at all	Applied to me to a considerable degree or a good part of time	Did not apply to me at all	Did not apply to me at all	Did not apply to me at all	Applied to me very much or most of the time	Applied to me to a considerable degree or a good part of time	Applied to me to a considerable degree or a good part of time	Applied to me to a considerable degree or a good part of time	Applied to me to a considerable degree or a good part of time	Did not apply to me at all	Applied to me to some degree, or some of the time	Did not apply to me at all	Applied to me to some degree, or some of the time	Did not apply to me at all	Did not apply to me at all	Applied to me to some degree, or some of the time	Did not apply to me at all	Applied to me to some degree, or some of the time	Did not apply to me at all	Did not apply to me at all	Did not apply to me at all
21	Male	Medical	3	Non-smoker	None	8	5	More than half the days	Nearly every day	Not at all	More than half the days	Not at all	More than half the days	Several days	Not at all	More than half the days	Applied to me to a considerable degree or a good part of time	Did not apply to me at all	Applied to me to some degree, or some of the time	Did not apply to me at all	Applied to me to some degree, or some of the time	Did not apply to me at all	Did not apply to me at all	Applied to me to some degree, or some of the time	Applied to me to a considerable degree or a good part of time	Applied to me to a considerable degree or a good part of time	Applied to me to a considerable degree or a good part of time	Applied to me to some degree, or some of the time	Applied to me very much or most of the time	Did not apply to me at all	Did not apply to me at all	Applied to me to some degree, or some of the time	Applied to me to some degree, or some of the time	Did not apply to me at all	Did not apply to me at all	Applied to me to some degree, or some of the time	Applied to me very much or most of the time
22	Female	Medical	3	Non-smoker	None	5	7	Several days	Several days	Several days	Several days	Several days	Several days	Several days	Several days	Several days	Did not apply to me at all	Did not apply to me at all	Did not apply to me at all	Did not apply to me at all	Did not apply to me at all	Applied to me to some degree, or some of the time	Did not apply to me at all	Did not apply to me at all	Did not apply to me at all	Did not apply to me at all	Did not apply to me at all	Did not apply to me at all	Did not apply to me at all	Did not apply to me at all	Did not apply to me at all	Did not apply to me at all	Did not apply to me at all	Did not apply to me at all	Did not apply to me at all	Did not apply to me at all	Did not apply to me at all
22	Female	Medical	3	Non-smoker	None	4	5	Several days	Several days	Not at all	More than half the days	Several days	Several days	Several days	Not at all	Not at all	Did not apply to me at all	Applied to me to some degree, or some of the time	Applied to me to some degree, or some of the time	Applied to me to some degree, or some of the time	Applied to me to a considerable degree or a good part of time	Applied to me to a considerable degree or a good part of time	Applied to me to some degree, or some of the time	Applied to me to some degree, or some of the time	Applied to me to a considerable degree or a good part of time	Did not apply to me at all	Applied to me to some degree, or some of the time	Applied to me to some degree, or some of the time	Applied to me to some degree, or some of the time	Applied to me to some degree, or some of the time	Applied to me to a considerable degree or a good part of time	Applied to me to some degree, or some of the time	Did not apply to me at all	Applied to me to some degree, or some of the time	Applied to me to some degree, or some of the time	Applied to me to some degree, or some of the time	Did not apply to me at all
23	Male	Medical	4	Former smoker	None	5	6	Several days	Not at all	More than half the days	Not at all	Not at all	Not at all	Not at all	Not at all	Not at all	Did not apply to me at all	Did not apply to me at all	Applied to me to some degree, or some of the time	Did not apply to me at all	Did not apply to me at all	Did not apply to me at all	Did not apply to me at all	Did not apply to me at all	Did not apply to me at all	Did not apply to me at all	Did not apply to me at all	Did not apply to me at all	Did not apply to me at all	Applied to me to a considerable degree or a good part of time	Did not apply to me at all	Did not apply to me at all	Did not apply to me at all	Did not apply to me at all	Did not apply to me at all	Did not apply to me at all	Did not apply to me at all
20	Male	Non-medical	3	Current smoker	None	2	7	Not at all	Not at all	Several days	Several days	Several days	Not at all	Not at all	Not at all	Not at all	Applied to me to some degree, or some of the time	Did not apply to me at all	Did not apply to me at all	Did not apply to me at all	Applied to me to some degree, or some of the time	Applied to me to some degree, or some of the time	Did not apply to me at all	Did not apply to me at all	Did not apply to me at all	Applied to me to some degree, or some of the time	Did not apply to me at all	Did not apply to me at all	Did not apply to me at all	Applied to me to a considerable degree or a good part of time	Did not apply to me at all	Did not apply to me at all	Did not apply to me at all	Did not apply to me at all	Did not apply to me at all	Did not apply to me at all	Did not apply to me at all
25	Male	Medical	5	Non-smoker	None	2	9	More than half the days	Not at all	Not at all	Several days	Not at all	Not at all	Not at all	Not at all	Not at all	Did not apply to me at all	Applied to me to some degree, or some of the time	Did not apply to me at all	Did not apply to me at all	Applied to me to some degree, or some of the time	Applied to me to some degree, or some of the time	Did not apply to me at all	Did not apply to me at all	Did not apply to me at all	Did not apply to me at all	Did not apply to me at all	Did not apply to me at all	Did not apply to me at all	Applied to me to some degree, or some of the time	Did not apply to me at all	Applied to me to some degree, or some of the time	Did not apply to me at all	Did not apply to me at all	Applied to me to some degree, or some of the time	Did not apply to me at all	Did not apply to me at all
22	Male	Non-medical	3	Current smoker	None	3	7	Several days	Several days	Several days	Several days	Several days	Not at all	Nearly every day	Several days	Not at all	Applied to me to some degree, or some of the time	Applied to me very much or most of the time	Did not apply to me at all	Did not apply to me at all	Applied to me to some degree, or some of the time	Applied to me to some degree, or some of the time	Applied to me very much or most of the time	Applied to me to some degree, or some of the time	Applied to me to some degree, or some of the time	Did not apply to me at all	Did not apply to me at all	Applied to me to some degree, or some of the time	Applied to me to some degree, or some of the time	Applied to me to some degree, or some of the time	Applied to me to some degree, or some of the time	Applied to me to some degree, or some of the time	Applied to me to some degree, or some of the time	Applied to me to some degree, or some of the time	Did not apply to me at all	Applied to me to some degree, or some of the time	Applied to me to a considerable degree or a good part of time
22	Female	Medical	4	Non-smoker	None	3	8	More than half the days	Several days	Not at all	Several days	Not at all	Not at all	Several days	Several days	Not at all	Did not apply to me at all	Did not apply to me at all	Did not apply to me at all	Did not apply to me at all	Applied to me to some degree, or some of the time	Did not apply to me at all	Applied to me to some degree, or some of the time	Did not apply to me at all	Did not apply to me at all	Did not apply to me at all	Applied to me to some degree, or some of the time	Did not apply to me at all	Applied to me to some degree, or some of the time	Did not apply to me at all	Did not apply to me at all	Did not apply to me at all	Did not apply to me at all	Did not apply to me at all	Did not apply to me at all	Did not apply to me at all	Did not apply to me at all
21	Female	Non-medical	3	Non-smoker	None	2	7	Several days	Several days	Not at all	Several days	Not at all	Not at all	Not at all	Not at all	Not at all	Did not apply to me at all	Did not apply to me at all	Did not apply to me at all	Did not apply to me at all	Did not apply to me at all	Applied to me to some degree, or some of the time	Did not apply to me at all	Did not apply to me at all	Did not apply to me at all	Did not apply to me at all	Applied to me to some degree, or some of the time	Did not apply to me at all	Did not apply to me at all	Applied to me to some degree, or some of the time	Did not apply to me at all	Did not apply to me at all	Did not apply to me at all	Did not apply to me at all	Did not apply to me at all	Did not apply to me at all	Did not apply to me at all
22	Female	Medical	3	Non-smoker	None	5	6	Several days	Several days	Not at all	Several days	Not at all	Not at all	Several days	Not at all	Not at all	Applied to me to a considerable degree or a good part of time	Did not apply to me at all	Did not apply to me at all	Did not apply to me at all	Did not apply to me at all	Did not apply to me at all	Did not apply to me at all	Applied to me to some degree, or some of the time	Applied to me to some degree, or some of the time	Did not apply to me at all	Did not apply to me at all	Applied to me to some degree, or some of the time	Applied to me to some degree, or some of the time	Applied to me to some degree, or some of the time	Applied to me to some degree, or some of the time	Applied to me to some degree, or some of the time	Applied to me to some degree, or some of the time	Did not apply to me at all	Applied to me to some degree, or some of the time	Applied to me to some degree, or some of the time	Applied to me to some degree, or some of the time
20	Male	Medical	2	Non-smoker	None	8	9	Nearly every day	Nearly every day	Nearly every day	Several days	More than half the days	Nearly every day	Several days	Not at all	Nearly every day	Applied to me to some degree, or some of the time	Applied to me to a considerable degree or a good part of time	Applied to me very much or most of the time	Did not apply to me at all	Applied to me very much or most of the time	Applied to me to some degree, or some of the time	Applied to me very much or most of the time	Applied to me very much or most of the time	Applied to me very much or most of the time	Applied to me very much or most of the time	Applied to me very much or most of the time	Applied to me very much or most of the time	Applied to me very much or most of the time	Applied to me to a considerable degree or a good part of time	Did not apply to me at all	Applied to me to some degree, or some of the time	Applied to me very much or most of the time	Did not apply to me at all	Did not apply to me at all	Applied to me to some degree, or some of the time	Applied to me very much or most of the time
23	Female	Non-medical	4	Non-smoker	None	7	6	Several days	Not at all	Not at all	Not at all	More than half the days	Several days	Several days	Not at all	Not at all	Did not apply to me at all	Did not apply to me at all	Applied to me very much or most of the time	Applied to me very much or most of the time	Applied to me to some degree, or some of the time	Did not apply to me at all	Applied to me to some degree, or some of the time	Did not apply to me at all	Applied to me to some degree, or some of the time	Applied to me very much or most of the time	Applied to me very much or most of the time	Applied to me very much or most of the time	Applied to me very much or most of the time	Applied to me very much or most of the time	Applied to me very much or most of the time	Applied to me very much or most of the time	Applied to me very much or most of the time	Applied to me to some degree, or some of the time	Applied to me very much or most of the time	Did not apply to me at all	Applied to me to some degree, or some of the time
21	Male	Medical	4	Non-smoker	None	3	4	Nearly every day	Several days	Several days	Several days	Several days	Not at all	Not at all	Not at all	Not at all	Did not apply to me at all	Did not apply to me at all	Did not apply to me at all	Did not apply to me at all	Applied to me to some degree, or some of the time	Applied to me to some degree, or some of the time	Did not apply to me at all	Did not apply to me at all	Did not apply to me at all	Did not apply to me at all	Did not apply to me at all	Did not apply to me at all	Did not apply to me at all	Did not apply to me at all	Did not apply to me at all	Did not apply to me at all	Did not apply to me at all	Did not apply to me at all	Did not apply to me at all	Did not apply to me at all	Did not apply to me at all
20	Female	Medical	3	Non-smoker	None	3	6	Nearly every day	Several days	Not at all	More than half the days	Not at all	Not at all	Not at all	Not at all	Not at all	Did not apply to me at all	Applied to me to some degree, or some of the time	Applied to me to some degree, or some of the time	Did not apply to me at all	Did not apply to me at all	Did not apply to me at all	Applied to me to some degree, or some of the time	Applied to me to some degree, or some of the time	Applied to me to some degree, or some of the time	Applied to me to a considerable degree or a good part of time	Applied to me to some degree, or some of the time	Applied to me very much or most of the time	Applied to me to some degree, or some of the time	Applied to me to a considerable degree or a good part of time	Applied to me to a considerable degree or a good part of time	Applied to me to a considerable degree or a good part of time	Applied to me to some degree, or some of the time	Applied to me to some degree, or some of the time	Applied to me to some degree, or some of the time	Applied to me to some degree, or some of the time	Applied to me very much or most of the time
22	Female	Medical	4	Non-smoker	None	5	7	More than half the days	Not at all	Several days	Several days	Several days	Not at all	Not at all	Not at all	Not at all	Did not apply to me at all	Applied to me to some degree, or some of the time	Applied to me to some degree, or some of the time	Applied to me to a considerable degree or a good part of time	Applied to me to a considerable degree or a good part of time	Applied to me to some degree, or some of the time	Applied to me to some degree, or some of the time	Applied to me to a considerable degree or a good part of time	Applied to me to a considerable degree or a good part of time	Applied to me to some degree, or some of the time	Applied to me to some degree, or some of the time	Applied to me to some degree, or some of the time	Applied to me to a considerable degree or a good part of time	Applied to me to some degree, or some of the time	Applied to me to some degree, or some of the time	Did not apply to me at all	Did not apply to me at all	Applied to me to some degree, or some of the time	Applied to me to some degree, or some of the time	Applied to me to some degree, or some of the time	Applied to me to some degree, or some of the time
24	Male	Medical	4	Non-smoker	None	3	5	Several days	Several days	Several days	Several days	Several days	Several days	Several days	Several days	Several days	Applied to me to some degree, or some of the time	Applied to me to some degree, or some of the time	Applied to me to some degree, or some of the time	Applied to me to some degree, or some of the time	Applied to me to some degree, or some of the time	Applied to me to some degree, or some of the time	Applied to me to some degree, or some of the time	Applied to me to some degree, or some of the time	Applied to me to some degree, or some of the time	Applied to me to some degree, or some of the time	Applied to me to some degree, or some of the time	Applied to me to some degree, or some of the time	Applied to me to some degree, or some of the time	Applied to me to some degree, or some of the time	Applied to me to some degree, or some of the time	Applied to me to some degree, or some of the time	Applied to me to some degree, or some of the time	Applied to me to some degree, or some of the time	Applied to me to some degree, or some of the time	Applied to me to some degree, or some of the time	Applied to me to some degree, or some of the time
22	Female	Medical	4	Non-smoker	None	7	7	Several days	More than half the days	Not at all	Nearly every day	Several days	Not at all	Several days	Not at all	Not at all	Did not apply to me at all	Applied to me to a considerable degree or a good part of time	Applied to me to a considerable degree or a good part of time	Did not apply to me at all	Applied to me to a considerable degree or a good part of time	Applied to me to a considerable degree or a good part of time	Applied to me to some degree, or some of the time	Did not apply to me at all	Did not apply to me at all	Did not apply to me at all	Did not apply to me at all	Applied to me to some degree, or some of the time	Applied to me very much or most of the time	Did not apply to me at all	Did not apply to me at all	Did not apply to me at all	Did not apply to me at all	Applied to me very much or most of the time	Applied to me very much or most of the time	Applied to me very much or most of the time	Did not apply to me at all
23	Male	Medical	5	Non-smoker	None	6	4	Several days	Several days	Not at all	Several days	Several days	Not at all	More than half the days	Not at all	Not at all	Applied to me to some degree, or some of the time	Did not apply to me at all	Applied to me to some degree, or some of the time	Did not apply to me at all	Applied to me to a considerable degree or a good part of time	Applied to me to some degree, or some of the time	Applied to me to some degree, or some of the time	Did not apply to me at all	Applied to me to some degree, or some of the time	Did not apply to me at all	Did not apply to me at all	Did not apply to me at all	Applied to me to some degree, or some of the time	Did not apply to me at all	Applied to me to a considerable degree or a good part of time	Applied to me to some degree, or some of the time	Applied to me to some degree, or some of the time	Did not apply to me at all	Applied to me to some degree, or some of the time	Did not apply to me at all	Did not apply to me at all
21	Female	Medical	2	Non-smoker	None	6	6	Several days	Not at all	More than half the days	Nearly every day	Several days	Several days	Nearly every day	Several days	Several days	Applied to me to some degree, or some of the time	Applied to me to some degree, or some of the time	Applied to me to some degree, or some of the time	Applied to me to some degree, or some of the time	Applied to me to some degree, or some of the time	Applied to me to some degree, or some of the time	Applied to me to some degree, or some of the time	Applied to me to some degree, or some of the time	Applied to me to some degree, or some of the time	Applied to me to some degree, or some of the time	Applied to me to some degree, or some of the time	Applied to me to some degree, or some of the time	Applied to me to some degree, or some of the time	Applied to me to a considerable degree or a good part of time	Applied to me to some degree, or some of the time	Applied to me to some degree, or some of the time	Did not apply to me at all	Did not apply to me at all	Applied to me to some degree, or some of the time	Applied to me to some degree, or some of the time	Did not apply to me at all
22	Female	Medical	4	Former smoker	Occasional	10	10	Not at all	Nearly every day	Nearly every day	Nearly every day	Several days	Several days	More than half the days	More than half the days	More than half the days	Applied to me to some degree, or some of the time	Did not apply to me at all	Applied to me to a considerable degree or a good part of time	Applied to me to a considerable degree or a good part of time	Did not apply to me at all	Applied to me to some degree, or some of the time	Applied to me to a considerable degree or a good part of time	Applied to me to some degree, or some of the time	Did not apply to me at all	Did not apply to me at all	Applied to me to a considerable degree or a good part of time	Applied to me to some degree, or some of the time	Applied to me to some degree, or some of the time	Did not apply to me at all	Applied to me to a considerable degree or a good part of time	Applied to me to a considerable degree or a good part of time	Did not apply to me at all	Did not apply to me at all	Did not apply to me at all	Applied to me very much or most of the time	Applied to me to a considerable degree or a good part of time
21	Female	Medical	3	Non-smoker	None	7	5	Nearly every day	Not at all	Several days	Several days	Several days	Not at all	Several days	More than half the days	Several days	Applied to me to a considerable degree or a good part of time	Applied to me to some degree, or some of the time	Applied to me to some degree, or some of the time	Applied to me to some degree, or some of the time	Applied to me to some degree, or some of the time	Applied to me to a considerable degree or a good part of time	Did not apply to me at all	Applied to me to some degree, or some of the time	Applied to me to some degree, or some of the time	Did not apply to me at all	Applied to me to some degree, or some of the time	Applied to me to some degree, or some of the time	Applied to me to a considerable degree or a good part of time	Applied to me to some degree, or some of the time	Applied to me to some degree, or some of the time	Applied to me to some degree, or some of the time	Did not apply to me at all	Applied to me to some degree, or some of the time	Applied to me to some degree, or some of the time	Applied to me to some degree, or some of the time	Applied to me to some degree, or some of the time
21	Female	Medical	4	Non-smoker	None	9	5	More than half the days	Several days	More than half the days	More than half the days	More than half the days	Not at all	Several days	Not at all	Not at all	Did not apply to me at all	Applied to me to some degree, or some of the time	Did not apply to me at all	Applied to me to some degree, or some of the time	Applied to me to some degree, or some of the time	Did not apply to me at all	Applied to me very much or most of the time	Applied to me to a considerable degree or a good part of time	Applied to me to a considerable degree or a good part of time	Applied to me to a considerable degree or a good part of time	Applied to me to a considerable degree or a good part of time	Applied to me to a considerable degree or a good part of time	Applied to me to a considerable degree or a good part of time	Applied to me to a considerable degree or a good part of time	Applied to me to a considerable degree or a good part of time	Applied to me to a considerable degree or a good part of time	Applied to me to a considerable degree or a good part of time	Applied to me to a considerable degree or a good part of time	Applied to me to a considerable degree or a good part of time	Applied to me to some degree, or some of the time	Applied to me to some degree, or some of the time
23	Female	Medical	5	Non-smoker	None	10	10	Not at all	Nearly every day	Not at all	Nearly every day	Nearly every day	Nearly every day	Nearly every day	Nearly every day	Nearly every day	Applied to me very much or most of the time	Applied to me very much or most of the time	Applied to me to a considerable degree or a good part of time	Applied to me to some degree, or some of the time	Did not apply to me at all	Applied to me very much or most of the time	Applied to me to a considerable degree or a good part of time	Applied to me very much or most of the time	Did not apply to me at all	Applied to me to a considerable degree or a good part of time	Applied to me very much or most of the time	Applied to me very much or most of the time	Applied to me to a considerable degree or a good part of time	Applied to me to a considerable degree or a good part of time	Applied to me very much or most of the time	Did not apply to me at all	Did not apply to me at all	Did not apply to me at all	Applied to me to some degree, or some of the time	Applied to me very much or most of the time	Applied to me very much or most of the time
21	Female	Medical	3	Non-smoker	None	7	6	Several days	More than half the days	More than half the days	Nearly every day	More than half the days	Nearly every day	Several days	More than half the days	More than half the days	Applied to me to some degree, or some of the time	Applied to me to a considerable degree or a good part of time	Applied to me to a considerable degree or a good part of time	Applied to me to some degree, or some of the time	Applied to me to a considerable degree or a good part of time	Applied to me to some degree, or some of the time	Did not apply to me at all	Applied to me to some degree, or some of the time	Applied to me to some degree, or some of the time	Applied to me to some degree, or some of the time	Applied to me to a considerable degree or a good part of time	Applied to me to a considerable degree or a good part of time	Applied to me very much or most of the time	Applied to me to some degree, or some of the time	Applied to me to some degree, or some of the time	Applied to me to some degree, or some of the time	Applied to me very much or most of the time	Applied to me very much or most of the time	Applied to me to a considerable degree or a good part of time	Applied to me to a considerable degree or a good part of time	Applied to me to some degree, or some of the time
23	Female	Medical	4	Non-smoker	None	4	9	Not at all	Several days	Not at all	Not at all	Several days	Not at all	Several days	Not at all	Not at all	Did not apply to me at all	Did not apply to me at all	Did not apply to me at all	Did not apply to me at all	Applied to me to some degree, or some of the time	Applied to me to some degree, or some of the time	Did not apply to me at all	Did not apply to me at all	Applied to me to some degree, or some of the time	Did not apply to me at all	Did not apply to me at all	Applied to me to some degree, or some of the time	Applied to me to some degree, or some of the time	Did not apply to me at all	Applied to me to some degree, or some of the time	Did not apply to me at all	Did not apply to me at all	Did not apply to me at all	Did not apply to me at all	Did not apply to me at all	Did not apply to me at all
21	Male	Medical	4	Non-smoker	None	4	6	Not at all	Not at all	Not at all	Several days	Several days	Several days	Not at all	Not at all	Not at all	Did not apply to me at all	Applied to me to some degree, or some of the time	Did not apply to me at all	Did not apply to me at all	Did not apply to me at all	Did not apply to me at all	Did not apply to me at all	Applied to me to some degree, or some of the time	Did not apply to me at all	Did not apply to me at all	Did not apply to me at all	Did not apply to me at all	Applied to me to some degree, or some of the time	Did not apply to me at all	Did not apply to me at all	Did not apply to me at all	Did not apply to me at all	Did not apply to me at all	Did not apply to me at all	Did not apply to me at all	Did not apply to me at all
22	Female	Medical	4	Non-smoker	None	5	7	Several days	Several days	Several days	Several days	Several days	Several days	Several days	Several days	Several days	Applied to me to some degree, or some of the time	Applied to me to some degree, or some of the time	Applied to me to some degree, or some of the time	Applied to me to some degree, or some of the time	Applied to me to some degree, or some of the time	Applied to me to some degree, or some of the time	Applied to me to some degree, or some of the time	Applied to me to some degree, or some of the time	Applied to me to some degree, or some of the time	Applied to me to some degree, or some of the time	Applied to me to some degree, or some of the time	Applied to me to some degree, or some of the time	Applied to me to some degree, or some of the time	Applied to me to some degree, or some of the time	Applied to me to some degree, or some of the time	Applied to me to some degree, or some of the time	Applied to me to some degree, or some of the time	Applied to me to some degree, or some of the time	Applied to me to some degree, or some of the time	Applied to me to some degree, or some of the time	Applied to me to some degree, or some of the time
24	Female	Medical	5	Non-smoker	None	4	7	Several days	Several days	Several days	Several days	Several days	Several days	Not at all	Not at all	Not at all	Did not apply to me at all	Applied to me to some degree, or some of the time	Did not apply to me at all	Did not apply to me at all	Applied to me to some degree, or some of the time	Applied to me to some degree, or some of the time	Did not apply to me at all	Did not apply to me at all	Did not apply to me at all	Did not apply to me at all	Did not apply to me at all	Applied to me to some degree, or some of the time	Applied to me to some degree, or some of the time	Did not apply to me at all	Did not apply to me at all	Applied to me to some degree, or some of the time	Did not apply to me at all	Applied to me to some degree, or some of the time	Applied to me to some degree, or some of the time	Did not apply to me at all	Did not apply to me at all
22	Female	Medical	4	Non-smoker	None	8	5	Several days	Nearly every day	Nearly every day	More than half the days	Nearly every day	Several days	Several days	Several days	Not at all	Applied to me to some degree, or some of the time	Applied to me to some degree, or some of the time	Applied to me to some degree, or some of the time	Applied to me very much or most of the time	Applied to me to some degree, or some of the time	Applied to me to some degree, or some of the time	Applied to me to some degree, or some of the time	Applied to me to some degree, or some of the time	Applied to me to some degree, or some of the time	Did not apply to me at all	Applied to me to some degree, or some of the time	Applied to me to some degree, or some of the time	Applied to me very much or most of the time	Applied to me to some degree, or some of the time	Applied to me to some degree, or some of the time	Applied to me to some degree, or some of the time	Applied to me to some degree, or some of the time	Applied to me very much or most of the time	Applied to me to some degree, or some of the time	Applied to me to a considerable degree or a good part of time	Applied to me to some degree, or some of the time
22	Female	Medical	3	Non-smoker	None	1	9	Nearly every day	Not at all	Not at all	Not at all	Not at all	Not at all	Several days	Not at all	Not at all	Applied to me to a considerable degree or a good part of time	Did not apply to me at all	Did not apply to me at all	Did not apply to me at all	Did not apply to me at all	Applied to me to some degree, or some of the time	Did not apply to me at all	Did not apply to me at all	Did not apply to me at all	Did not apply to me at all	Did not apply to me at all	Did not apply to me at all	Did not apply to me at all	Did not apply to me at all	Did not apply to me at all	Did not apply to me at all	Applied to me to some degree, or some of the time	Did not apply to me at all	Did not apply to me at all	Did not apply to me at all	Did not apply to me at all
22	Female	Medical	4	Non-smoker	None	4	8	More than half the days	Not at all	Several days	Several days	Not at all	Not at all	Not at all	Not at all	Not at all	Did not apply to me at all	Did not apply to me at all	Did not apply to me at all	Did not apply to me at all	Applied to me to some degree, or some of the time	Applied to me to some degree, or some of the time	Did not apply to me at all	Applied to me to some degree, or some of the time	Did not apply to me at all	Did not apply to me at all	Did not apply to me at all	Applied to me to some degree, or some of the time	Applied to me to some degree, or some of the time	Applied to me to some degree, or some of the time	Applied to me to some degree, or some of the time	Did not apply to me at all	Did not apply to me at all	Applied to me to some degree, or some of the time	Did not apply to me at all	Did not apply to me at all	Did not apply to me at all
23	Male	Medical	4	Current smoker	None	2	9	More than half the days	Not at all	Nearly every day	Not at all	Several days	Not at all	Not at all	Not at all	Several days	Did not apply to me at all	Applied to me to some degree, or some of the time	Did not apply to me at all	Did not apply to me at all	Did not apply to me at all	Applied to me to some degree, or some of the time	Did not apply to me at all	Did not apply to me at all	Did not apply to me at all	Did not apply to me at all	Did not apply to me at all	Applied to me to some degree, or some of the time	Applied to me to some degree, or some of the time	Applied to me to a considerable degree or a good part of time	Did not apply to me at all	Did not apply to me at all	Did not apply to me at all	Did not apply to me at all	Did not apply to me at all	Did not apply to me at all	Did not apply to me at all
22	Male	Medical	4	Non-smoker	Regular	1	8	Not at all	Not at all	Not at all	Not at all	Not at all	Not at all	Not at all	Not at all	Not at all	Did not apply to me at all	Did not apply to me at all	Did not apply to me at all	Did not apply to me at all	Did not apply to me at all	Did not apply to me at all	Did not apply to me at all	Did not apply to me at all	Did not apply to me at all	Did not apply to me at all	Did not apply to me at all	Did not apply to me at all	Did not apply to me at all	Did not apply to me at all	Did not apply to me at all	Did not apply to me at all	Did not apply to me at all	Did not apply to me at all	Did not apply to me at all	Did not apply to me at all	Did not apply to me at all
21	Male	Medical	3	Non-smoker	None	5	5	Nearly every day	Not at all	Several days	Not at all	Not at all	Not at all	Not at all	Not at all	Not at all	Did not apply to me at all	Did not apply to me at all	Did not apply to me at all	Did not apply to me at all	Did not apply to me at all	Did not apply to me at all	Did not apply to me at all	Did not apply to me at all	Did not apply to me at all	Did not apply to me at all	Did not apply to me at all	Did not apply to me at all	Did not apply to me at all	Did not apply to me at all	Did not apply to me at all	Did not apply to me at all	Did not apply to me at all	Did not apply to me at all	Did not apply to me at all	Did not apply to me at all	Did not apply to me at all
22	Female	Medical	4	Non-smoker	None	3	7	Not at all	Nearly every day	Several days	Several days	Not at all	Not at all	Nearly every day	Nearly every day	Not at all	Applied to me very much or most of the time	Applied to me very much or most of the time	Applied to me to some degree, or some of the time	Did not apply to me at all	Did not apply to me at all	Applied to me to some degree, or some of the time	Did not apply to me at all	Did not apply to me at all	Did not apply to me at all	Applied to me to some degree, or some of the time	Applied to me to some degree, or some of the time	Applied to me to some degree, or some of the time	Applied to me to some degree, or some of the time	Did not apply to me at all	Did not apply to me at all	Applied to me very much or most of the time	Did not apply to me at all	Did not apply to me at all	Did not apply to me at all	Did not apply to me at all	Did not apply to me at all
26	Male	Medical	5	Non-smoker	None	4	7	Several days	Not at all	Not at all	Not at all	Not at all	Not at all	Not at all	Not at all	Not at all	Did not apply to me at all	Did not apply to me at all	Did not apply to me at all	Did not apply to me at all	Applied to me to some degree, or some of the time	Did not apply to me at all	Did not apply to me at all	Did not apply to me at all	Did not apply to me at all	Did not apply to me at all	Did not apply to me at all	Did not apply to me at all	Did not apply to me at all	Did not apply to me at all	Applied to me to some degree, or some of the time	Did not apply to me at all	Did not apply to me at all	Did not apply to me at all	Did not apply to me at all	Did not apply to me at all	Did not apply to me at all
23	Male	Medical	4	Former smoker	None	4	5	Several days	Several days	Not at all	Not at all	Several days	Not at all	Not at all	Not at all	Several days	Applied to me to some degree, or some of the time	Applied to me to some degree, or some of the time	Applied to me to some degree, or some of the time	Applied to me to some degree, or some of the time	Did not apply to me at all	Did not apply to me at all	Applied to me to some degree, or some of the time	Applied to me to some degree, or some of the time	Applied to me to a considerable degree or a good part of time	Applied to me to some degree, or some of the time	Applied to me to some degree, or some of the time	Applied to me to a considerable degree or a good part of time	Applied to me to a considerable degree or a good part of time	Applied to me to a considerable degree or a good part of time	Applied to me to a considerable degree or a good part of time	Applied to me to a considerable degree or a good part of time	Applied to me to a considerable degree or a good part of time	Did not apply to me at all	Did not apply to me at all	Did not apply to me at all	Did not apply to me at all
22	Female	Medical	4	Non-smoker	None	6	6	Several days	Several days	Several days	Several days	Several days	Several days	Several days	More than half the days	Several days	Applied to me to some degree, or some of the time	Applied to me to some degree, or some of the time	Applied to me to some degree, or some of the time	Did not apply to me at all	Applied to me to some degree, or some of the time	Applied to me to some degree, or some of the time	Applied to me to some degree, or some of the time	Applied to me to some degree, or some of the time	Applied to me to some degree, or some of the time	Applied to me to some degree, or some of the time	Applied to me to some degree, or some of the time	Applied to me to some degree, or some of the time	Applied to me to some degree, or some of the time	Applied to me to some degree, or some of the time	Did not apply to me at all	Applied to me to some degree, or some of the time	Applied to me to a considerable degree or a good part of time	Applied to me to a considerable degree or a good part of time	Did not apply to me at all	Applied to me to some degree, or some of the time	Applied to me to some degree, or some of the time
23	Male	Medical	4	Non-smoker	None	3	8	Several days	Several days	Not at all	Not at all	Several days	Not at all	Several days	More than half the days	Not at all	Applied to me to some degree, or some of the time	Applied to me to some degree, or some of the time	Did not apply to me at all	Did not apply to me at all	Applied to me to some degree, or some of the time	Applied to me to a considerable degree or a good part of time	Did not apply to me at all	Did not apply to me at all	Did not apply to me at all	Did not apply to me at all	Applied to me to some degree, or some of the time	Applied to me to some degree, or some of the time	Did not apply to me at all	Applied to me to some degree, or some of the time	Did not apply to me at all	Applied to me to a considerable degree or a good part of time	Did not apply to me at all	Did not apply to me at all	Did not apply to me at all	Did not apply to me at all	Did not apply to me at all
23	Female	Medical	3	Non-smoker	None	10	4	Nearly every day	Several days	Several days	More than half the days	Not at all	Nearly every day	Several days	Several days	Several days	Did not apply to me at all	Applied to me to some degree, or some of the time	Applied to me to a considerable degree or a good part of time	Applied to me very much or most of the time	Applied to me to some degree, or some of the time	Applied to me very much or most of the time	Applied to me to a considerable degree or a good part of time	Applied to me very much or most of the time	Applied to me to a considerable degree or a good part of time	Applied to me to a considerable degree or a good part of time	Applied to me to some degree, or some of the time	Applied to me to a considerable degree or a good part of time	Applied to me to a considerable degree or a good part of time	Applied to me to a considerable degree or a good part of time	Applied to me to a considerable degree or a good part of time	Applied to me to some degree, or some of the time	Applied to me to some degree, or some of the time	Applied to me to some degree, or some of the time	Applied to me to a considerable degree or a good part of time	Applied to me to some degree, or some of the time	Applied to me to a considerable degree or a good part of time
23	Female	Medical	3	Non-smoker	None	10	7	Nearly every day	Nearly every day	Nearly every day	Nearly every day	Nearly every day	More than half the days	Several days	More than half the days	More than half the days	Applied to me to a considerable degree or a good part of time	Applied to me to a considerable degree or a good part of time	Applied to me to a considerable degree or a good part of time	Applied to me to some degree, or some of the time	Applied to me to a considerable degree or a good part of time	Applied to me to a considerable degree or a good part of time	Applied to me to a considerable degree or a good part of time	Applied to me to a considerable degree or a good part of time	Applied to me to a considerable degree or a good part of time	Applied to me very much or most of the time	Applied to me very much or most of the time	Applied to me very much or most of the time	Applied to me very much or most of the time	Applied to me very much or most of the time	Applied to me to a considerable degree or a good part of time	Applied to me to a considerable degree or a good part of time	Applied to me very much or most of the time	Applied to me to a considerable degree or a good part of time	Applied to me to a considerable degree or a good part of time	Applied to me to a considerable degree or a good part of time	Applied to me very much or most of the time
22	Female	Medical	4	Non-smoker	None	4	5	Several days	Several days	Several days	Several days	Several days	Several days	Several days	Several days	Several days	Applied to me to some degree, or some of the time	Applied to me to some degree, or some of the time	Applied to me to some degree, or some of the time	Applied to me to some degree, or some of the time	Applied to me to a considerable degree or a good part of time	Applied to me to a considerable degree or a good part of time	Applied to me to some degree, or some of the time	Applied to me to a considerable degree or a good part of time	Applied to me to a considerable degree or a good part of time	Applied to me to some degree, or some of the time	Applied to me to a considerable degree or a good part of time	Applied to me to some degree, or some of the time	Applied to me to a considerable degree or a good part of time	Applied to me to some degree, or some of the time	Applied to me to a considerable degree or a good part of time	Applied to me to some degree, or some of the time	Applied to me to some degree, or some of the time	Applied to me to a considerable degree or a good part of time	Applied to me to a considerable degree or a good part of time	Applied to me to a considerable degree or a good part of time	Applied to me to some degree, or some of the time
23	Male	Medical	4	Non-smoker	None	6	4	Not at all	Several days	Not at all	Not at all	Not at all	Not at all	Not at all	Not at all	Not at all	Did not apply to me at all	Applied to me to a considerable degree or a good part of time	Did not apply to me at all	Applied to me to some degree, or some of the time	Applied to me to some degree, or some of the time	Applied to me to some degree, or some of the time	Did not apply to me at all	Applied to me to some degree, or some of the time	Did not apply to me at all	Did not apply to me at all	Applied to me to some degree, or some of the time	Did not apply to me at all	Did not apply to me at all	Applied to me to some degree, or some of the time	Did not apply to me at all	Did not apply to me at all	Did not apply to me at all	Applied to me to some degree, or some of the time	Did not apply to me at all	Applied to me to some degree, or some of the time	Did not apply to me at all
23	Male	Medical	3	Former smoker	None	10	3	Nearly every day	Nearly every day	Nearly every day	Nearly every day	Nearly every day	Nearly every day	Nearly every day	Nearly every day	Nearly every day	Applied to me to some degree, or some of the time	Applied to me to a considerable degree or a good part of time	Applied to me very much or most of the time	Applied to me very much or most of the time	Applied to me very much or most of the time	Applied to me very much or most of the time	Applied to me very much or most of the time	Applied to me very much or most of the time	Applied to me very much or most of the time	Applied to me very much or most of the time	Applied to me very much or most of the time	Applied to me very much or most of the time	Applied to me very much or most of the time	Applied to me very much or most of the time	Applied to me very much or most of the time	Applied to me very much or most of the time	Applied to me very much or most of the time	Applied to me very much or most of the time	Applied to me very much or most of the time	Applied to me very much or most of the time	Applied to me very much or most of the time
21	Female	Medical	4	Non-smoker	None	7	7	Several days	More than half the days	Several days	Several days	Several days	More than half the days	Nearly every day	Several days	Several days	Did not apply to me at all	Did not apply to me at all	Applied to me to some degree, or some of the time	Did not apply to me at all	Applied to me to some degree, or some of the time	Applied to me to a considerable degree or a good part of time	Did not apply to me at all	Applied to me to some degree, or some of the time	Applied to me to some degree, or some of the time	Applied to me to a considerable degree or a good part of time	Applied to me very much or most of the time	Applied to me to some degree, or some of the time	Applied to me to some degree, or some of the time	Applied to me to some degree, or some of the time	Applied to me to some degree, or some of the time	Applied to me to some degree, or some of the time	Applied to me to some degree, or some of the time	Applied to me to some degree, or some of the time	Did not apply to me at all	Did not apply to me at all	Applied to me very much or most of the time
19	Female	Non-medical	1	Non-smoker	None	8	5	Not at all	Nearly every day	Nearly every day	More than half the days	Nearly every day	More than half the days	Nearly every day	Nearly every day	Nearly every day	Applied to me to a considerable degree or a good part of time	Did not apply to me at all	Did not apply to me at all	Applied to me to a considerable degree or a good part of time	Applied to me to a considerable degree or a good part of time	Applied to me to a considerable degree or a good part of time	Applied to me to a considerable degree or a good part of time	Applied to me to a considerable degree or a good part of time	Applied to me to a considerable degree or a good part of time	Applied to me to a considerable degree or a good part of time	Applied to me to a considerable degree or a good part of time	Applied to me to some degree, or some of the time	Applied to me to a considerable degree or a good part of time	Applied to me very much or most of the time	Applied to me very much or most of the time	Applied to me very much or most of the time	Applied to me very much or most of the time	Applied to me to a considerable degree or a good part of time	Applied to me very much or most of the time	Applied to me very much or most of the time	Applied to me very much or most of the time
22	Female	Medical	3	Non-smoker	None	4	6	Not at all	Not at all	Not at all	Not at all	Not at all	Not at all	Not at all	Not at all	Not at all	Did not apply to me at all	Applied to me to some degree, or some of the time	Did not apply to me at all	Did not apply to me at all	Did not apply to me at all	Applied to me to some degree, or some of the time	Did not apply to me at all	Did not apply to me at all	Applied to me to some degree, or some of the time	Did not apply to me at all	Applied to me to some degree, or some of the time	Did not apply to me at all	Did not apply to me at all	Did not apply to me at all	Did not apply to me at all	Did not apply to me at all	Did not apply to me at all	Applied to me to some degree, or some of the time	Did not apply to me at all	Did not apply to me at all	Did not apply to me at all
19	Male	Medical	1	Non-smoker	None	7	4	Nearly every day	Several days	Not at all	More than half the days	Not at all	Nearly every day	More than half the days	Not at all	Not at all	Did not apply to me at all	Applied to me to some degree, or some of the time	Did not apply to me at all	Applied to me to some degree, or some of the time	Applied to me very much or most of the time	Applied to me to some degree, or some of the time	Applied to me to some degree, or some of the time	Applied to me to some degree, or some of the time	Did not apply to me at all	Did not apply to me at all	Applied to me to a considerable degree or a good part of time	Applied to me to a considerable degree or a good part of time	Applied to me to some degree, or some of the time	Did not apply to me at all	Applied to me to some degree, or some of the time	Applied to me to a considerable degree or a good part of time	Did not apply to me at all	Applied to me to a considerable degree or a good part of time	Applied to me very much or most of the time	Did not apply to me at all	Applied to me to some degree, or some of the time
21	Female	Medical	5	Non-smoker	None	1	4	Several days	Not at all	Several days	Nearly every day	Nearly every day	Not at all	Several days	Several days	Not at all	Did not apply to me at all	Applied to me to some degree, or some of the time	Applied to me to some degree, or some of the time	Did not apply to me at all	Applied to me to some degree, or some of the time	Did not apply to me at all	Applied to me to some degree, or some of the time	Did not apply to me at all	Did not apply to me at all	Did not apply to me at all	Did not apply to me at all	Applied to me to some degree, or some of the time	Applied to me to some degree, or some of the time	Applied to me to a considerable degree or a good part of time	Applied to me to some degree, or some of the time	Applied to me to some degree, or some of the time	Did not apply to me at all	Applied to me to a considerable degree or a good part of time	Did not apply to me at all	Applied to me to some degree, or some of the time	Did not apply to me at all
22	Male	Medical	4	Non-smoker	None	5	7	Several days	Several days	Several days	Several days	Several days	Several days	Several days	Several days	Several days	Did not apply to me at all	Applied to me to some degree, or some of the time	Applied to me to some degree, or some of the time	Applied to me to a considerable degree or a good part of time	Applied to me to some degree, or some of the time	Applied to me to some degree, or some of the time	Did not apply to me at all	Applied to me to a considerable degree or a good part of time	Did not apply to me at all	Applied to me to some degree, or some of the time	Applied to me to some degree, or some of the time	Applied to me to some degree, or some of the time	Applied to me to some degree, or some of the time	Applied to me to some degree, or some of the time	Applied to me to some degree, or some of the time	Applied to me to some degree, or some of the time	Applied to me to some degree, or some of the time	Applied to me to some degree, or some of the time	Applied to me to some degree, or some of the time	Applied to me to some degree, or some of the time	Applied to me to some degree, or some of the time
22	Female	Medical	3	Non-smoker	None	10	6	Not at all	Nearly every day	Not at all	Nearly every day	Not at all	Several days	Not at all	Not at all	More than half the days	Applied to me very much or most of the time	Applied to me very much or most of the time	Applied to me to some degree, or some of the time	Did not apply to me at all	Applied to me very much or most of the time	Applied to me very much or most of the time	Did not apply to me at all	Applied to me very much or most of the time	Applied to me very much or most of the time	Applied to me to a considerable degree or a good part of time	Applied to me to a considerable degree or a good part of time	Applied to me to some degree, or some of the time	Applied to me to a considerable degree or a good part of time	Applied to me to some degree, or some of the time	Applied to me to some degree, or some of the time	Applied to me to some degree, or some of the time	Applied to me to some degree, or some of the time	Applied to me very much or most of the time	Applied to me to some degree, or some of the time	Applied to me to some degree, or some of the time	Applied to me to some degree, or some of the time
22	Male	Medical	4	Former smoker	None	7	2	Several days	More than half the days	Nearly every day	Several days	Several days	More than half the days	More than half the days	Not at all	Not at all	Applied to me very much or most of the time	Applied to me to some degree, or some of the time	Applied to me to some degree, or some of the time	Did not apply to me at all	Did not apply to me at all	Applied to me to a considerable degree or a good part of time	Applied to me to some degree, or some of the time	Applied to me to some degree, or some of the time	Applied to me to some degree, or some of the time	Did not apply to me at all	Did not apply to me at all	Applied to me to some degree, or some of the time	Applied to me to some degree, or some of the time	Applied to me to a considerable degree or a good part of time	Applied to me to some degree, or some of the time	Applied to me very much or most of the time	Did not apply to me at all	Applied to me to a considerable degree or a good part of time	Applied to me to some degree, or some of the time	Applied to me to a considerable degree or a good part of time	Did not apply to me at all
21	Male	Medical	4	Non-smoker	None	2	7	Several days	Not at all	Not at all	Not at all	Not at all	Not at all	Not at all	Not at all	Not at all	Applied to me to some degree, or some of the time	Did not apply to me at all	Did not apply to me at all	Did not apply to me at all	Applied to me to some degree, or some of the time	Did not apply to me at all	Did not apply to me at all	Did not apply to me at all	Did not apply to me at all	Did not apply to me at all	Did not apply to me at all	Did not apply to me at all	Did not apply to me at all	Did not apply to me at all	Did not apply to me at all	Did not apply to me at all	Did not apply to me at all	Did not apply to me at all	Did not apply to me at all	Did not apply to me at all	Did not apply to me at all
22	Male	Medical	4	Non-smoker	None	2	10	Nearly every day	Several days	Several days	Several days	Several days	Several days	Several days	Several days	Several days	Did not apply to me at all	Did not apply to me at all	Did not apply to me at all	Did not apply to me at all	Did not apply to me at all	Did not apply to me at all	Did not apply to me at all	Did not apply to me at all	Did not apply to me at all	Did not apply to me at all	Did not apply to me at all	Did not apply to me at all	Did not apply to me at all	Did not apply to me at all	Did not apply to me at all	Did not apply to me at all	Did not apply to me at all	Did not apply to me at all	Did not apply to me at all	Did not apply to me at all	Did not apply to me at all
22	Female	Medical	4	Non-smoker	None	5	8	Several days	Several days	Several days	Several days	Several days	Several days	Several days	More than half the days	Not at all	Applied to me to some degree, or some of the time	Applied to me to a considerable degree or a good part of time	Applied to me to some degree, or some of the time	Did not apply to me at all	Did not apply to me at all	Did not apply to me at all	Applied to me to some degree, or some of the time	Did not apply to me at all	Did not apply to me at all	Did not apply to me at all	Did not apply to me at all	Did not apply to me at all	Did not apply to me at all	Did not apply to me at all	Did not apply to me at all	Applied to me to some degree, or some of the time	Applied to me to some degree, or some of the time	Did not apply to me at all	Applied to me to some degree, or some of the time	Did not apply to me at all	Did not apply to me at all
23	Female	Non-medical	3	Non-smoker	None	10	5	More than half the days	Nearly every day	Nearly every day	Nearly every day	Nearly every day	Several days	Nearly every day	Nearly every day	More than half the days	Did not apply to me at all	Applied to me very much or most of the time	Did not apply to me at all	Did not apply to me at all	Did not apply to me at all	Applied to me to a considerable degree or a good part of time	Applied to me to a considerable degree or a good part of time	Applied to me very much or most of the time	Applied to me to a considerable degree or a good part of time	Applied to me very much or most of the time	Applied to me very much or most of the time	Applied to me very much or most of the time	Applied to me to a considerable degree or a good part of time	Applied to me to a considerable degree or a good part of time	Applied to me very much or most of the time	Applied to me to a considerable degree or a good part of time	Applied to me very much or most of the time	Applied to me very much or most of the time	Applied to me to a considerable degree or a good part of time	Applied to me to a considerable degree or a good part of time	Applied to me to a considerable degree or a good part of time
21	Male	Medical	3	Non-smoker	None	3	9	Not at all	More than half the days	Nearly every day	More than half the days	Not at all	Several days	Not at all	Several days	More than half the days	Applied to me to some degree, or some of the time	Applied to me to some degree, or some of the time	Did not apply to me at all	Applied to me to a considerable degree or a good part of time	Applied to me to a considerable degree or a good part of time	Did not apply to me at all	Applied to me to a considerable degree or a good part of time	Applied to me to some degree, or some of the time	Did not apply to me at all	Applied to me very much or most of the time	Applied to me to some degree, or some of the time	Applied to me to a considerable degree or a good part of time	Applied to me to a considerable degree or a good part of time	Applied to me to some degree, or some of the time	Applied to me to a considerable degree or a good part of time	Applied to me to a considerable degree or a good part of time	Applied to me very much or most of the time	Applied to me to some degree, or some of the time	Applied to me to some degree, or some of the time	Applied to me to a considerable degree or a good part of time	Did not apply to me at all
18	Male	Medical	1	Current smoker	None	3	6	Nearly every day	Several days	Not at all	Several days	Not at all	Not at all	Several days	Not at all	Not at all	Did not apply to me at all	Applied to me to a considerable degree or a good part of time	Did not apply to me at all	Did not apply to me at all	Did not apply to me at all	Applied to me to some degree, or some of the time	Applied to me to some degree, or some of the time	Applied to me to some degree, or some of the time	Applied to me to some degree, or some of the time	Did not apply to me at all	Applied to me to a considerable degree or a good part of time	Did not apply to me at all	Applied to me to some degree, or some of the time	Did not apply to me at all	Applied to me to some degree, or some of the time	Did not apply to me at all	Applied to me to some degree, or some of the time	Did not apply to me at all	Applied to me very much or most of the time	Did not apply to me at all	Did not apply to me at all
22	Male	Medical	3	Non-smoker	None	1	6	More than half the days	Several days	Several days	More than half the days	Several days	Several days	Not at all	Not at all	Not at all	Did not apply to me at all	Did not apply to me at all	Did not apply to me at all	Applied to me to some degree, or some of the time	Applied to me to some degree, or some of the time	Applied to me to a considerable degree or a good part of time	Did not apply to me at all	Applied to me to some degree, or some of the time	Applied to me to a considerable degree or a good part of time	Did not apply to me at all	Did not apply to me at all	Applied to me to some degree, or some of the time	Applied to me to some degree, or some of the time	Applied to me to some degree, or some of the time	Applied to me to some degree, or some of the time	Did not apply to me at all	Applied to me to some degree, or some of the time	Applied to me to some degree, or some of the time	Did not apply to me at all	Did not apply to me at all	Applied to me to some degree, or some of the time
23	Male	Non-medical	4	Non-smoker	None	5	8	Several days	Several days	Not at all	More than half the days	Not at all	Not at all	Not at all	Not at all	Not at all	Applied to me to some degree, or some of the time	Applied to me to some degree, or some of the time	Applied to me to some degree, or some of the time	Did not apply to me at all	Did not apply to me at all	Did not apply to me at all	Did not apply to me at all	Applied to me to a considerable degree or a good part of time	Did not apply to me at all	Did not apply to me at all	Applied to me to a considerable degree or a good part of time	Applied to me to some degree, or some of the time	Applied to me to some degree, or some of the time	Applied to me very much or most of the time	Applied to me to some degree, or some of the time	Did not apply to me at all	Did not apply to me at all	Applied to me very much or most of the time	Applied to me to some degree, or some of the time	Did not apply to me at all	Did not apply to me at all
25	Male	Non-medical	4	Former smoker	None	5	8	Several days	Several days	Not at all	Several days	Not at all	Not at all	Nearly every day	More than half the days	Not at all	Applied to me to some degree, or some of the time	Applied to me to a considerable degree or a good part of time	Applied to me to a considerable degree or a good part of time	Did not apply to me at all	Applied to me to a considerable degree or a good part of time	Applied to me very much or most of the time	Did not apply to me at all	Applied to me to some degree, or some of the time	Applied to me to a considerable degree or a good part of time	Applied to me to some degree, or some of the time	Applied to me to some degree, or some of the time	Applied to me to a considerable degree or a good part of time	Applied to me to a considerable degree or a good part of time	Did not apply to me at all	Did not apply to me at all	Applied to me very much or most of the time	Did not apply to me at all	Did not apply to me at all	Did not apply to me at all	Applied to me to some degree, or some of the time	Applied to me to some degree, or some of the time
21	Female	Medical	4	Non-smoker	None	10	6	More than half the days	Several days	Several days	Several days	Several days	Not at all	Several days	Not at all	Not at all	Applied to me to some degree, or some of the time	Applied to me to some degree, or some of the time	Did not apply to me at all	Applied to me to some degree, or some of the time	Applied to me to some degree, or some of the time	Applied to me to some degree, or some of the time	Applied to me to a considerable degree or a good part of time	Applied to me to a considerable degree or a good part of time	Applied to me to a considerable degree or a good part of time	Did not apply to me at all	Applied to me to some degree, or some of the time	Applied to me to a considerable degree or a good part of time	Applied to me to some degree, or some of the time	Applied to me to some degree, or some of the time	Applied to me to some degree, or some of the time	Applied to me to some degree, or some of the time	Did not apply to me at all	Applied to me to some degree, or some of the time	Did not apply to me at all	Applied to me to some degree, or some of the time	Did not apply to me at all
24	Female	Medical	3	Non-smoker	None	8	5	More than half the days	More than half the days	More than half the days	Several days	Several days	Several days	Several days	Several days	Nearly every day	Applied to me to some degree, or some of the time	Did not apply to me at all	Applied to me to some degree, or some of the time	Applied to me to some degree, or some of the time	Applied to me to some degree, or some of the time	Applied to me to some degree, or some of the time	Applied to me very much or most of the time	Applied to me very much or most of the time	Applied to me very much or most of the time	Applied to me very much or most of the time	Applied to me very much or most of the time	Applied to me very much or most of the time	Applied to me very much or most of the time	Applied to me very much or most of the time	Applied to me very much or most of the time	Applied to me to a considerable degree or a good part of time	Applied to me to a considerable degree or a good part of time	Applied to me to a considerable degree or a good part of time	Applied to me to a considerable degree or a good part of time	Applied to me to a considerable degree or a good part of time	Applied to me very much or most of the time
23	Female	Medical	4	Non-smoker	None	6	5	Several days	Several days	More than half the days	More than half the days	Several days	Not at all	Not at all	Several days	Not at all	Applied to me to some degree, or some of the time	Applied to me to some degree, or some of the time	Applied to me to some degree, or some of the time	Applied to me to some degree, or some of the time	Applied to me to some degree, or some of the time	Applied to me to a considerable degree or a good part of time	Did not apply to me at all	Applied to me to some degree, or some of the time	Applied to me to a considerable degree or a good part of time	Did not apply to me at all	Applied to me to a considerable degree or a good part of time	Applied to me to some degree, or some of the time	Applied to me to some degree, or some of the time	Applied to me very much or most of the time	Applied to me to some degree, or some of the time	Did not apply to me at all	Did not apply to me at all	Applied to me very much or most of the time	Did not apply to me at all	Did not apply to me at all	Did not apply to me at all
17	Male	Medical	1	Current smoker	Regular	10	10	More than half the days	Nearly every day	Nearly every day	Nearly every day	Nearly every day	Nearly every day	Nearly every day	Nearly every day	Nearly every day	Applied to me very much or most of the time	Applied to me very much or most of the time	Applied to me very much or most of the time	Applied to me very much or most of the time	Applied to me very much or most of the time	Applied to me very much or most of the time	Applied to me very much or most of the time	Applied to me very much or most of the time	Applied to me very much or most of the time	Applied to me very much or most of the time	Applied to me very much or most of the time	Applied to me very much or most of the time	Applied to me very much or most of the time	Applied to me very much or most of the time	Applied to me very much or most of the time	Applied to me very much or most of the time	Applied to me very much or most of the time	Applied to me very much or most of the time	Applied to me very much or most of the time	Applied to me very much or most of the time	Applied to me very much or most of the time
20	Female	Medical	3	Non-smoker	None	6	9	Not at all	Not at all	Several days	Several days	Several days	Not at all	Not at all	Not at all	Not at all	Applied to me to a considerable degree or a good part of time	Did not apply to me at all	Did not apply to me at all	Did not apply to me at all	Applied to me very much or most of the time	Applied to me very much or most of the time	Did not apply to me at all	Did not apply to me at all	Applied to me to a considerable degree or a good part of time	Did not apply to me at all	Applied to me to some degree, or some of the time	Applied to me to some degree, or some of the time	Applied to me to some degree, or some of the time	Did not apply to me at all	Did not apply to me at all	Did not apply to me at all	Did not apply to me at all	Did not apply to me at all	Did not apply to me at all	Did not apply to me at all	Did not apply to me at all
19	Female	Medical	1	Non-smoker	None	4	9	Nearly every day	Nearly every day	Nearly every day	Nearly every day	Not at all	Not at all	Not at all	Not at all	Not at all	Did not apply to me at all	Did not apply to me at all	Did not apply to me at all	Did not apply to me at all	Did not apply to me at all	Did not apply to me at all	Did not apply to me at all	Did not apply to me at all	Did not apply to me at all	Did not apply to me at all	Did not apply to me at all	Did not apply to me at all	Did not apply to me at all	Did not apply to me at all	Did not apply to me at all	Did not apply to me at all	Did not apply to me at all	Did not apply to me at all	Did not apply to me at all	Did not apply to me at all	Did not apply to me at all
21	Female	Medical	3	Current smoker	None	6	7	Several days	More than half the days	Nearly every day	Several days	Nearly every day	Several days	Nearly every day	More than half the days	Not at all	Applied to me to some degree, or some of the time	Applied to me very much or most of the time	Applied to me to a considerable degree or a good part of time	Applied to me to a considerable degree or a good part of time	Applied to me to some degree, or some of the time	Applied to me very much or most of the time	Applied to me to a considerable degree or a good part of time	Applied to me to a considerable degree or a good part of time	Applied to me to a considerable degree or a good part of time	Did not apply to me at all	Applied to me to a considerable degree or a good part of time	Applied to me to a considerable degree or a good part of time	Applied to me to a considerable degree or a good part of time	Applied to me to a considerable degree or a good part of time	Applied to me to some degree, or some of the time	Applied to me to some degree, or some of the time	Applied to me to some degree, or some of the time	Applied to me to a considerable degree or a good part of time	Did not apply to me at all	Applied to me to a considerable degree or a good part of time	Did not apply to me at all
21	Male	Medical	4	Non-smoker	None	5	5	More than half the days	Several days	Several days	More than half the days	Not at all	Not at all	Several days	Not at all	Not at all	Did not apply to me at all	Applied to me to some degree, or some of the time	Did not apply to me at all	Did not apply to me at all	Applied to me to some degree, or some of the time	Applied to me to some degree, or some of the time	Did not apply to me at all	Applied to me to some degree, or some of the time	Applied to me to a considerable degree or a good part of time	Did not apply to me at all	Applied to me to some degree, or some of the time	Did not apply to me at all	Did not apply to me at all	Did not apply to me at all	Did not apply to me at all	Did not apply to me at all	Did not apply to me at all	Applied to me to a considerable degree or a good part of time	Did not apply to me at all	Did not apply to me at all	Did not apply to me at all
23	Female	Medical	4	Non-smoker	None	4	6	Several days	Several days	More than half the days	More than half the days	Several days	Several days	Not at all	Not at all	Not at all	Applied to me to some degree, or some of the time	Applied to me to some degree, or some of the time	Applied to me to a considerable degree or a good part of time	Applied to me to a considerable degree or a good part of time	Applied to me to a considerable degree or a good part of time	Applied to me to some degree, or some of the time	Applied to me to some degree, or some of the time	Applied to me to some degree, or some of the time	Applied to me to some degree, or some of the time	Applied to me to a considerable degree or a good part of time	Applied to me to a considerable degree or a good part of time	Applied to me to a considerable degree or a good part of time	Applied to me to a considerable degree or a good part of time	Applied to me to some degree, or some of the time	Did not apply to me at all	Did not apply to me at all	Applied to me to some degree, or some of the time	Applied to me to some degree, or some of the time	Applied to me to some degree, or some of the time	Did not apply to me at all	Did not apply to me at all
22	Male	Non-medical	3	Non-smoker	None	5	4	Several days	Several days	Several days	Several days	Not at all	Several days	Several days	Several days	Several days	Applied to me to some degree, or some of the time	Did not apply to me at all	Did not apply to me at all	Did not apply to me at all	Did not apply to me at all	Did not apply to me at all	Did not apply to me at all	Did not apply to me at all	Did not apply to me at all	Did not apply to me at all	Did not apply to me at all	Did not apply to me at all	Did not apply to me at all	Did not apply to me at all	Did not apply to me at all	Did not apply to me at all	Did not apply to me at all	Did not apply to me at all	Did not apply to me at all	Did not apply to me at all	Did not apply to me at all
25	Female	Medical	5	Non-smoker	None	7	10	Several days	Not at all	Several days	Several days	Not at all	Several days	Not at all	Not at all	Not at all	Did not apply to me at all	Did not apply to me at all	Applied to me to some degree, or some of the time	Applied to me to some degree, or some of the time	Applied to me to some degree, or some of the time	Applied to me to some degree, or some of the time	Did not apply to me at all	Did not apply to me at all	Applied to me to some degree, or some of the time	Did not apply to me at all	Did not apply to me at all	Applied to me to some degree, or some of the time	Did not apply to me at all	Did not apply to me at all	Applied to me to some degree, or some of the time	Applied to me to some degree, or some of the time	Did not apply to me at all	Applied to me to some degree, or some of the time	Did not apply to me at all	Did not apply to me at all	Did not apply to me at all
26	Female	Medical	5	Non-smoker	None	8	8	Nearly every day	More than half the days	Several days	Nearly every day	Nearly every day	Nearly every day	Nearly every day	Nearly every day	Several days	Applied to me very much or most of the time	Applied to me very much or most of the time	Applied to me to some degree, or some of the time	Applied to me to some degree, or some of the time	Applied to me very much or most of the time	Applied to me to some degree, or some of the time	Applied to me to some degree, or some of the time	Applied to me to a considerable degree or a good part of time	Applied to me very much or most of the time	Applied to me very much or most of the time	Applied to me very much or most of the time	Applied to me very much or most of the time	Applied to me very much or most of the time	Applied to me to a considerable degree or a good part of time	Applied to me to a considerable degree or a good part of time	Applied to me very much or most of the time	Applied to me very much or most of the time	Applied to me very much or most of the time	Applied to me very much or most of the time	Applied to me very much or most of the time	Applied to me to some degree, or some of the time
25	Male	Medical	4	Non-smoker	None	6	6	Not at all	Several days	Several days	Not at all	Not at all	Not at all	Several days	Not at all	Not at all	Applied to me to some degree, or some of the time	Applied to me to some degree, or some of the time	Did not apply to me at all	Did not apply to me at all	Applied to me to some degree, or some of the time	Did not apply to me at all	Did not apply to me at all	Applied to me to some degree, or some of the time	Applied to me to some degree, or some of the time	Applied to me to some degree, or some of the time	Applied to me to some degree, or some of the time	Did not apply to me at all	Applied to me to some degree, or some of the time	Applied to me to some degree, or some of the time	Did not apply to me at all	Applied to me to some degree, or some of the time	Did not apply to me at all	Did not apply to me at all	Did not apply to me at all	Applied to me to some degree, or some of the time	Did not apply to me at all
22	Female	Medical	4	Non-smoker	None	2	7	Not at all	Several days	Several days	Several days	Several days	Not at all	Not at all	Not at all	Not at all	Did not apply to me at all	Did not apply to me at all	Did not apply to me at all	Did not apply to me at all	Applied to me to some degree, or some of the time	Did not apply to me at all	Applied to me to some degree, or some of the time	Did not apply to me at all	Applied to me to some degree, or some of the time	Did not apply to me at all	Did not apply to me at all	Applied to me to some degree, or some of the time	Applied to me to some degree, or some of the time	Did not apply to me at all	Did not apply to me at all	Applied to me to some degree, or some of the time	Did not apply to me at all	Did not apply to me at all	Applied to me to some degree, or some of the time	Applied to me to some degree, or some of the time	Did not apply to me at all
23	Female	Medical	4	Non-smoker	None	2	5	Several days	Several days	More than half the days	More than half the days	Not at all	Not at all	Not at all	Not at all	Not at all	Did not apply to me at all	Did not apply to me at all	Did not apply to me at all	Did not apply to me at all	Applied to me to some degree, or some of the time	Applied to me to some degree, or some of the time	Did not apply to me at all	Applied to me to some degree, or some of the time	Did not apply to me at all	Did not apply to me at all	Did not apply to me at all	Did not apply to me at all	Did not apply to me at all	Did not apply to me at all	Did not apply to me at all	Did not apply to me at all	Did not apply to me at all	Did not apply to me at all	Did not apply to me at all	Did not apply to me at all	Did not apply to me at all
23	Female	Non-medical	4	Non-smoker	None	1	5	Not at all	Nearly every day	Not at all	Nearly every day	Nearly every day	Nearly every day	Nearly every day	Nearly every day	Nearly every day	Applied to me to some degree, or some of the time	Did not apply to me at all	Applied to me very much or most of the time	Applied to me to some degree, or some of the time	Did not apply to me at all	Applied to me to some degree, or some of the time	Did not apply to me at all	Applied to me to some degree, or some of the time	Applied to me very much or most of the time	Did not apply to me at all	Did not apply to me at all	Applied to me to some degree, or some of the time	Did not apply to me at all	Did not apply to me at all	Applied to me very much or most of the time	Applied to me to some degree, or some of the time	Applied to me very much or most of the time	Applied to me to some degree, or some of the time	Applied to me very much or most of the time	Applied to me very much or most of the time	Did not apply to me at all
22	Male	Medical	4	Non-smoker	None	5	6	Nearly every day	Not at all	More than half the days	Several days	Not at all	Not at all	Not at all	More than half the days	Not at all	Applied to me to some degree, or some of the time	Applied to me to some degree, or some of the time	Did not apply to me at all	Did not apply to me at all	Applied to me to some degree, or some of the time	Applied to me to a considerable degree or a good part of time	Did not apply to me at all	Did not apply to me at all	Applied to me to some degree, or some of the time	Did not apply to me at all	Did not apply to me at all	Applied to me to some degree, or some of the time	Did not apply to me at all	Did not apply to me at all	Did not apply to me at all	Did not apply to me at all	Did not apply to me at all	Applied to me to a considerable degree or a good part of time	Did not apply to me at all	Did not apply to me at all	Did not apply to me at all
22	Male	Non-medical	4	Non-smoker	None	4	7	Not at all	Not at all	Not at all	Several days	Not at all	Not at all	Not at all	Not at all	Not at all	Applied to me to some degree, or some of the time	Applied to me to some degree, or some of the time	Did not apply to me at all	Did not apply to me at all	Applied to me to some degree, or some of the time	Did not apply to me at all	Did not apply to me at all	Applied to me to some degree, or some of the time	Did not apply to me at all	Did not apply to me at all	Did not apply to me at all	Did not apply to me at all	Did not apply to me at all	Did not apply to me at all	Did not apply to me at all	Did not apply to me at all	Applied to me to some degree, or some of the time	Did not apply to me at all	Did not apply to me at all	Did not apply to me at all	Did not apply to me at all
21	Female	Medical	4	Non-smoker	None	1	5	Not at all	Not at all	Not at all	Not at all	Not at all	Not at all	Not at all	Not at all	Not at all	Did not apply to me at all	Did not apply to me at all	Did not apply to me at all	Did not apply to me at all	Did not apply to me at all	Applied to me to some degree, or some of the time	Did not apply to me at all	Did not apply to me at all	Did not apply to me at all	Did not apply to me at all	Did not apply to me at all	Did not apply to me at all	Did not apply to me at all	Did not apply to me at all	Did not apply to me at all	Did not apply to me at all	Did not apply to me at all	Did not apply to me at all	Did not apply to me at all	Did not apply to me at all	Did not apply to me at all
21	Female	Medical	2	Non-smoker	None	6	4	Several days	More than half the days	Nearly every day	Nearly every day	More than half the days	Not at all	More than half the days	More than half the days	Not at all	Applied to me to some degree, or some of the time	Applied to me to a considerable degree or a good part of time	Did not apply to me at all	Did not apply to me at all	Applied to me to some degree, or some of the time	Applied to me to a considerable degree or a good part of time	Did not apply to me at all	Applied to me to some degree, or some of the time	Applied to me to some degree, or some of the time	Did not apply to me at all	Did not apply to me at all	Applied to me to a considerable degree or a good part of time	Applied to me to a considerable degree or a good part of time	Applied to me to some degree, or some of the time	Applied to me to some degree, or some of the time	Did not apply to me at all	Applied to me to some degree, or some of the time	Applied to me to some degree, or some of the time	Applied to me to some degree, or some of the time	Applied to me to some degree, or some of the time	Did not apply to me at all
25	Male	Non-medical	4	Non-smoker	None	5	8	More than half the days	Not at all	Nearly every day	Several days	Several days	Several days	Not at all	Not at all	Not at all	Did not apply to me at all	Applied to me to some degree, or some of the time	Did not apply to me at all	Applied to me to some degree, or some of the time	Applied to me to some degree, or some of the time	Did not apply to me at all	Did not apply to me at all	Did not apply to me at all	Applied to me to some degree, or some of the time	Did not apply to me at all	Did not apply to me at all	Did not apply to me at all	Did not apply to me at all	Did not apply to me at all	Applied to me to some degree, or some of the time	Did not apply to me at all	Applied to me to some degree, or some of the time	Did not apply to me at all	Did not apply to me at all	Did not apply to me at all	Applied to me to some degree, or some of the time
22	Male	Medical	4	Non-smoker	Occasional	6	4	Not at all	Several days	Several days	Several days	Several days	Several days	Several days	Several days	Several days	Applied to me to some degree, or some of the time	Applied to me to some degree, or some of the time	Applied to me to some degree, or some of the time	Applied to me to some degree, or some of the time	Applied to me to some degree, or some of the time	Applied to me to some degree, or some of the time	Applied to me to some degree, or some of the time	Applied to me to some degree, or some of the time	Applied to me to some degree, or some of the time	Applied to me to some degree, or some of the time	Applied to me to some degree, or some of the time	Applied to me to some degree, or some of the time	Applied to me to some degree, or some of the time	Applied to me to some degree, or some of the time	Applied to me to some degree, or some of the time	Applied to me to some degree, or some of the time	Applied to me to some degree, or some of the time	Applied to me to some degree, or some of the time	Applied to me to some degree, or some of the time	Applied to me to some degree, or some of the time	Applied to me to some degree, or some of the time
20	Male	Medical	4	Non-smoker	None	1	8	Not at all	Not at all	Not at all	Not at all	Not at all	Not at all	Not at all	Not at all	Not at all	Did not apply to me at all	Did not apply to me at all	Did not apply to me at all	Did not apply to me at all	Did not apply to me at all	Did not apply to me at all	Did not apply to me at all	Did not apply to me at all	Did not apply to me at all	Did not apply to me at all	Did not apply to me at all	Did not apply to me at all	Did not apply to me at all	Did not apply to me at all	Did not apply to me at all	Did not apply to me at all	Did not apply to me at all	Did not apply to me at all	Did not apply to me at all	Did not apply to me at all	Did not apply to me at all
22	Female	Non-medical	4	Non-smoker	None	3	9	Nearly every day	Several days	Several days	Several days	Several days	Not at all	Not at all	Not at all	Not at all	Applied to me to a considerable degree or a good part of time	Did not apply to me at all	Did not apply to me at all	Did not apply to me at all	Did not apply to me at all	Did not apply to me at all	Did not apply to me at all	Did not apply to me at all	Did not apply to me at all	Did not apply to me at all	Did not apply to me at all	Did not apply to me at all	Did not apply to me at all	Did not apply to me at all	Did not apply to me at all	Did not apply to me at all	Did not apply to me at all	Did not apply to me at all	Did not apply to me at all	Did not apply to me at all	Did not apply to me at all
21	Female	Medical	4	Non-smoker	None	8	7	Nearly every day	Several days	Several days	Several days	Not at all	Several days	Not at all	Not at all	Several days	Did not apply to me at all	Did not apply to me at all	Did not apply to me at all	Did not apply to me at all	Did not apply to me at all	Did not apply to me at all	Did not apply to me at all	Did not apply to me at all	Did not apply to me at all	Did not apply to me at all	Did not apply to me at all	Did not apply to me at all	Did not apply to me at all	Did not apply to me at all	Did not apply to me at all	Did not apply to me at all	Did not apply to me at all	Did not apply to me at all	Did not apply to me at all	Did not apply to me at all	Did not apply to me at all
23	Male	Medical	5	Non-smoker	None	5	7	Several days	Not at all	Not at all	More than half the days	Not at all	Not at all	Not at all	Not at all	Not at all	Did not apply to me at all	Did not apply to me at all	Did not apply to me at all	Did not apply to me at all	Did not apply to me at all	Did not apply to me at all	Did not apply to me at all	Did not apply to me at all	Did not apply to me at all	Did not apply to me at all	Did not apply to me at all	Did not apply to me at all	Did not apply to me at all	Did not apply to me at all	Did not apply to me at all	Did not apply to me at all	Did not apply to me at all	Did not apply to me at all	Did not apply to me at all	Did not apply to me at all	Did not apply to me at all
23	Female	Medical	5	Non-smoker	None	4	10	More than half the days	Several days	More than half the days	More than half the days	More than half the days	Not at all	Several days	Not at all	Not at all	Did not apply to me at all	Applied to me to some degree, or some of the time	Did not apply to me at all	Applied to me to some degree, or some of the time	Applied to me to some degree, or some of the time	Applied to me to some degree, or some of the time	Did not apply to me at all	Applied to me to some degree, or some of the time	Applied to me to some degree, or some of the time	Did not apply to me at all	Applied to me to some degree, or some of the time	Applied to me to some degree, or some of the time	Applied to me to some degree, or some of the time	Did not apply to me at all	Did not apply to me at all	Applied to me to some degree, or some of the time	Did not apply to me at all	Applied to me to some degree, or some of the time	Applied to me to some degree, or some of the time	Did not apply to me at all	Did not apply to me at all
20	Female	Medical	4	Non-smoker	None	8	8	More than half the days	More than half the days	Nearly every day	Nearly every day	Nearly every day	Nearly every day	Nearly every day	Nearly every day	Nearly every day	Applied to me to a considerable degree or a good part of time	Applied to me very much or most of the time	Applied to me very much or most of the time	Applied to me to a considerable degree or a good part of time	Applied to me to some degree, or some of the time	Did not apply to me at all	Applied to me to some degree, or some of the time	Did not apply to me at all	Applied to me to some degree, or some of the time	Did not apply to me at all	Applied to me to some degree, or some of the time	Did not apply to me at all	Applied to me very much or most of the time	Did not apply to me at all	Applied to me to a considerable degree or a good part of time	Did not apply to me at all	Applied to me to some degree, or some of the time	Applied to me to a considerable degree or a good part of time	Applied to me to some degree, or some of the time	Did not apply to me at all	Applied to me very much or most of the time
21	Female	Medical	4	Non-smoker	None	7	5	Not at all	Not at all	Not at all	Several days	Several days	Not at all	Not at all	Not at all	Not at all	Did not apply to me at all	Applied to me to some degree, or some of the time	Applied to me to some degree, or some of the time	Applied to me to a considerable degree or a good part of time	Did not apply to me at all	Applied to me to some degree, or some of the time	Applied to me to some degree, or some of the time	Applied to me to some degree, or some of the time	Applied to me to some degree, or some of the time	Did not apply to me at all	Did not apply to me at all	Applied to me to some degree, or some of the time	Did not apply to me at all	Did not apply to me at all	Did not apply to me at all	Did not apply to me at all	Did not apply to me at all	Applied to me to some degree, or some of the time	Applied to me to some degree, or some of the time	Did not apply to me at all	Did not apply to me at all
22	Female	Medical	3	Non-smoker	None	9	4	Nearly every day	Nearly every day	Nearly every day	Nearly every day	Nearly every day	Nearly every day	Nearly every day	Nearly every day	Not at all	Applied to me very much or most of the time	Applied to me very much or most of the time	Applied to me to a considerable degree or a good part of time	Applied to me very much or most of the time	Applied to me very much or most of the time	Applied to me very much or most of the time	Applied to me very much or most of the time	Applied to me very much or most of the time	Applied to me very much or most of the time	Applied to me to a considerable degree or a good part of time	Applied to me very much or most of the time	Applied to me very much or most of the time	Applied to me very much or most of the time	Applied to me very much or most of the time	Applied to me very much or most of the time	Applied to me very much or most of the time	Applied to me to some degree, or some of the time	Applied to me very much or most of the time	Applied to me very much or most of the time	Applied to me very much or most of the time	Applied to me to some degree, or some of the time
22	Female	Medical	4	Non-smoker	None	5	5	Not at all	Not at all	Not at all	Not at all	Not at all	Several days	Not at all	Several days	Several days	Did not apply to me at all	Did not apply to me at all	Did not apply to me at all	Did not apply to me at all	Did not apply to me at all	Did not apply to me at all	Did not apply to me at all	Did not apply to me at all	Did not apply to me at all	Did not apply to me at all	Did not apply to me at all	Did not apply to me at all	Did not apply to me at all	Did not apply to me at all	Did not apply to me at all	Did not apply to me at all	Did not apply to me at all	Did not apply to me at all	Did not apply to me at all	Did not apply to me at all	Did not apply to me at all
22	Female	Medical	4	Non-smoker	None	1	10	Not at all	More than half the days	Not at all	More than half the days	Several days	Several days	Not at all	Not at all	Not at all	Did not apply to me at all	Did not apply to me at all	Did not apply to me at all	Did not apply to me at all	Did not apply to me at all	Did not apply to me at all	Did not apply to me at all	Did not apply to me at all	Did not apply to me at all	Did not apply to me at all	Did not apply to me at all	Did not apply to me at all	Did not apply to me at all	Did not apply to me at all	Did not apply to me at all	Did not apply to me at all	Did not apply to me at all	Did not apply to me at all	Did not apply to me at all	Did not apply to me at all	Did not apply to me at all
22	Male	Medical	4	Non-smoker	None	4	6	More than half the days	Not at all	Not at all	Not at all	More than half the days	Several days	Not at all	Not at all	Not at all	Did not apply to me at all	Did not apply to me at all	Did not apply to me at all	Did not apply to me at all	Did not apply to me at all	Did not apply to me at all	Did not apply to me at all	Did not apply to me at all	Did not apply to me at all	Did not apply to me at all	Did not apply to me at all	Did not apply to me at all	Did not apply to me at all	Did not apply to me at all	Did not apply to me at all	Did not apply to me at all	Did not apply to me at all	Did not apply to me at all	Did not apply to me at all	Did not apply to me at all	Did not apply to me at all
22	Female	Medical	4	Non-smoker	None	3	6	More than half the days	Several days	Several days	More than half the days	Several days	Not at all	Several days	Several days	Not at all	Applied to me to some degree, or some of the time	Applied to me to a considerable degree or a good part of time	Did not apply to me at all	Did not apply to me at all	Applied to me to some degree, or some of the time	Applied to me to some degree, or some of the time	Applied to me to some degree, or some of the time	Applied to me to some degree, or some of the time	Applied to me to some degree, or some of the time	Did not apply to me at all	Applied to me to a considerable degree or a good part of time	Did not apply to me at all	Applied to me to some degree, or some of the time	Applied to me to some degree, or some of the time	Applied to me to some degree, or some of the time	Did not apply to me at all	Did not apply to me at all	Applied to me to a considerable degree or a good part of time	Applied to me to some degree, or some of the time	Applied to me to some degree, or some of the time	Did not apply to me at all
22	Female	Medical	4	Non-smoker	None	7	5	More than half the days	Several days	Several days	Several days	Several days	Several days	Several days	Several days	Several days	Applied to me to some degree, or some of the time	Applied to me to some degree, or some of the time	Did not apply to me at all	Did not apply to me at all	Applied to me to some degree, or some of the time	Applied to me to some degree, or some of the time	Applied to me to some degree, or some of the time	Applied to me to some degree, or some of the time	Applied to me to some degree, or some of the time	Applied to me to some degree, or some of the time	Applied to me to some degree, or some of the time	Applied to me to a considerable degree or a good part of time	Applied to me to some degree, or some of the time	Applied to me to some degree, or some of the time	Applied to me to some degree, or some of the time	Applied to me to some degree, or some of the time	Applied to me to some degree, or some of the time	Applied to me to a considerable degree or a good part of time	Applied to me to a considerable degree or a good part of time	Applied to me to some degree, or some of the time	Applied to me to some degree, or some of the time
21	Male	Medical	4	Non-smoker	None	5	8	Several days	Several days	Not at all	Not at all	Several days	Not at all	Not at all	Several days	Not at all	Applied to me to some degree, or some of the time	Did not apply to me at all	Did not apply to me at all	Applied to me to a considerable degree or a good part of time	Applied to me to some degree, or some of the time	Did not apply to me at all	Applied to me to some degree, or some of the time	Did not apply to me at all	Applied to me to some degree, or some of the time	Applied to me to some degree, or some of the time	Did not apply to me at all	Did not apply to me at all	Did not apply to me at all	Applied to me to some degree, or some of the time	Did not apply to me at all	Applied to me to some degree, or some of the time	Did not apply to me at all	Did not apply to me at all	Applied to me to some degree, or some of the time	Did not apply to me at all	Did not apply to me at all
23	Male	Medical	4	Former smoker	None	8	4	Several days	Several days	More than half the days	More than half the days	Several days	More than half the days	More than half the days	Not at all	Several days	Applied to me to some degree, or some of the time	Applied to me very much or most of the time	Applied to me to a considerable degree or a good part of time	Applied to me to a considerable degree or a good part of time	Did not apply to me at all	Did not apply to me at all	Applied to me to some degree, or some of the time	Did not apply to me at all	Applied to me to some degree, or some of the time	Applied to me to a considerable degree or a good part of time	Applied to me to some degree, or some of the time	Applied to me very much or most of the time	Applied to me to a considerable degree or a good part of time	Applied to me to some degree, or some of the time	Applied to me to some degree, or some of the time	Applied to me to some degree, or some of the time	Applied to me to some degree, or some of the time	Applied to me to some degree, or some of the time	Applied to me to some degree, or some of the time	Did not apply to me at all	Applied to me to some degree, or some of the time
19	Female	Medical	2	Non-smoker	None	1	4	Several days	More than half the days	Several days	Several days	More than half the days	More than half the days	Not at all	Nearly every day	More than half the days	Applied to me to some degree, or some of the time	Did not apply to me at all	Applied to me to a considerable degree or a good part of time	Applied to me to a considerable degree or a good part of time	Applied to me to some degree, or some of the time	Applied to me to a considerable degree or a good part of time	Applied to me to a considerable degree or a good part of time	Applied to me to some degree, or some of the time	Applied to me to some degree, or some of the time	Applied to me to a considerable degree or a good part of time	Applied to me to some degree, or some of the time	Applied to me to a considerable degree or a good part of time	Applied to me to some degree, or some of the time	Applied to me to some degree, or some of the time	Did not apply to me at all	Applied to me to a considerable degree or a good part of time	Applied to me to a considerable degree or a good part of time	Applied to me to some degree, or some of the time	Applied to me to some degree, or some of the time	Applied to me to some degree, or some of the time	Applied to me to a considerable degree or a good part of time
21	Female	Non-medical	4	Non-smoker	None	7	9	Several days	Not at all	Not at all	Several days	Several days	Several days	More than half the days	More than half the days	Several days	Applied to me very much or most of the time	Did not apply to me at all	Applied to me to some degree, or some of the time	Did not apply to me at all	Applied to me very much or most of the time	Applied to me to a considerable degree or a good part of time	Did not apply to me at all	Applied to me to some degree, or some of the time	Applied to me to a considerable degree or a good part of time	Did not apply to me at all	Did not apply to me at all	Applied to me to some degree, or some of the time	Did not apply to me at all	Did not apply to me at all	Applied to me to some degree, or some of the time	Applied to me to some degree, or some of the time	Applied to me to a considerable degree or a good part of time	Applied to me to some degree, or some of the time	Did not apply to me at all	Applied to me to a considerable degree or a good part of time	Did not apply to me at all
21	Male	Medical	3	Non-smoker	None	3	9	Several days	Several days	Several days	Several days	Not at all	Several days	Several days	Not at all	Several days	Applied to me to some degree, or some of the time	Did not apply to me at all	Applied to me very much or most of the time	Applied to me to a considerable degree or a good part of time	Applied to me to some degree, or some of the time	Applied to me to a considerable degree or a good part of time	Applied to me to a considerable degree or a good part of time	Applied to me to a considerable degree or a good part of time	Applied to me to a considerable degree or a good part of time	Applied to me to a considerable degree or a good part of time	Applied to me to a considerable degree or a good part of time	Applied to me to some degree, or some of the time	Applied to me to some degree, or some of the time	Applied to me to a considerable degree or a good part of time	Applied to me to some degree, or some of the time	Applied to me very much or most of the time	Applied to me very much or most of the time	Applied to me to some degree, or some of the time	Applied to me to some degree, or some of the time	Applied to me to some degree, or some of the time	Applied to me very much or most of the time
26	Female	Medical	5	Non-smoker	None	7	6	Several days	Several days	Several days	Several days	Not at all	Several days	Not at all	Not at all	Not at all	Applied to me to some degree, or some of the time	Did not apply to me at all	Applied to me to some degree, or some of the time	Did not apply to me at all	Applied to me to a considerable degree or a good part of time	Applied to me to a considerable degree or a good part of time	Did not apply to me at all	Applied to me to some degree, or some of the time	Applied to me to some degree, or some of the time	Applied to me to some degree, or some of the time	Applied to me to a considerable degree or a good part of time	Applied to me to some degree, or some of the time	Applied to me to some degree, or some of the time	Applied to me to some degree, or some of the time	Applied to me to some degree, or some of the time	Applied to me to some degree, or some of the time	Applied to me to a considerable degree or a good part of time	Applied to me to some degree, or some of the time	Did not apply to me at all	Did not apply to me at all	Applied to me to some degree, or some of the time
21	Female	Non-medical	4	Non-smoker	None	6	6	More than half the days	More than half the days	More than half the days	More than half the days	Nearly every day	Not at all	Several days	Not at all	Not at all	Applied to me to some degree, or some of the time	Did not apply to me at all	Did not apply to me at all	Did not apply to me at all	Applied to me to a considerable degree or a good part of time	Applied to me to some degree, or some of the time	Did not apply to me at all	Did not apply to me at all	Did not apply to me at all	Did not apply to me at all	Applied to me to some degree, or some of the time	Applied to me to some degree, or some of the time	Applied to me to some degree, or some of the time	Applied to me to some degree, or some of the time	Did not apply to me at all	Applied to me to some degree, or some of the time	Applied to me to some degree, or some of the time	Applied to me to some degree, or some of the time	Did not apply to me at all	Applied to me to some degree, or some of the time	Did not apply to me at all
24	Male	Non-medical	5	Non-smoker	None	1	3	Several days	More than half the days	More than half the days	Not at all	Several days	Not at all	Nearly every day	Several days	More than half the days	Did not apply to me at all	Applied to me to some degree, or some of the time	Applied to me to a considerable degree or a good part of time	Applied to me very much or most of the time	Did not apply to me at all	Applied to me to some degree, or some of the time	Applied to me to a considerable degree or a good part of time	Applied to me very much or most of the time	Did not apply to me at all	Applied to me to some degree, or some of the time	Applied to me to a considerable degree or a good part of time	Applied to me very much or most of the time	Did not apply to me at all	Applied to me to some degree, or some of the time	Applied to me to a considerable degree or a good part of time	Applied to me very much or most of the time	Did not apply to me at all	Did not apply to me at all	Applied to me to some degree, or some of the time	Applied to me to some degree, or some of the time	Applied to me very much or most of the time
20	Female	Medical	1	Non-smoker	None	8	4	Several days	Several days	Nearly every day	More than half the days	Nearly every day	Nearly every day	Nearly every day	Several days	Several days	Applied to me to some degree, or some of the time	Applied to me very much or most of the time	Applied to me very much or most of the time	Applied to me very much or most of the time	Applied to me to a considerable degree or a good part of time	Applied to me very much or most of the time	Applied to me very much or most of the time	Applied to me to a considerable degree or a good part of time	Applied to me to a considerable degree or a good part of time	Applied to me to some degree, or some of the time	Applied to me to a considerable degree or a good part of time	Applied to me to some degree, or some of the time	Applied to me to a considerable degree or a good part of time	Applied to me to a considerable degree or a good part of time	Applied to me to a considerable degree or a good part of time	Applied to me very much or most of the time	Applied to me very much or most of the time	Applied to me to a considerable degree or a good part of time	Applied to me very much or most of the time	Applied to me to a considerable degree or a good part of time	Applied to me to some degree, or some of the time
22	Female	Medical	5	Non-smoker	None	4	8	Several days	Several days	Several days	More than half the days	Several days	Not at all	Not at all	Not at all	Not at all	Applied to me to some degree, or some of the time	Did not apply to me at all	Applied to me to some degree, or some of the time	Did not apply to me at all	Applied to me to some degree, or some of the time	Did not apply to me at all	Did not apply to me at all	Applied to me to some degree, or some of the time	Did not apply to me at all	Did not apply to me at all	Applied to me to some degree, or some of the time	Did not apply to me at all	Applied to me to some degree, or some of the time	Applied to me to some degree, or some of the time	Did not apply to me at all	Applied to me to some degree, or some of the time	Did not apply to me at all	Applied to me to some degree, or some of the time	Applied to me to some degree, or some of the time	Did not apply to me at all	Did not apply to me at all
22	Female	Medical	3	Non-smoker	None	7	5	Not at all	Several days	Not at all	More than half the days	Several days	Not at all	Not at all	Not at all	Several days	Applied to me to some degree, or some of the time	Did not apply to me at all	Applied to me to some degree, or some of the time	Applied to me to some degree, or some of the time	Applied to me to a considerable degree or a good part of time	Did not apply to me at all	Applied to me to some degree, or some of the time	Applied to me to some degree, or some of the time	Applied to me to a considerable degree or a good part of time	Applied to me to some degree, or some of the time	Applied to me very much or most of the time	Applied to me very much or most of the time	Applied to me to some degree, or some of the time	Did not apply to me at all	Applied to me to some degree, or some of the time	Did not apply to me at all	Applied to me to some degree, or some of the time	Applied to me to some degree, or some of the time	Applied to me to some degree, or some of the time	Applied to me very much or most of the time	Applied to me to some degree, or some of the time
23	Female	Medical	3	Non-smoker	None	3	8	Several days	Not at all	Not at all	Several days	Several days	Not at all	Not at all	Not at all	Not at all	Did not apply to me at all	Applied to me to some degree, or some of the time	Applied to me to a considerable degree or a good part of time	Did not apply to me at all	Applied to me to some degree, or some of the time	Applied to me to some degree, or some of the time	Did not apply to me at all	Applied to me to some degree, or some of the time	Applied to me to some degree, or some of the time	Did not apply to me at all	Applied to me to some degree, or some of the time	Did not apply to me at all	Applied to me to some degree, or some of the time	Applied to me to some degree, or some of the time	Did not apply to me at all	Did not apply to me at all	Did not apply to me at all	Applied to me to some degree, or some of the time	Did not apply to me at all	Did not apply to me at all	Did not apply to me at all
24	Female	Non-medical	5	Non-smoker	None	7	7	More than half the days	Nearly every day	Not at all	Nearly every day	Several days	Nearly every day	Several days	Not at all	Several days	Did not apply to me at all	Applied to me to a considerable degree or a good part of time	Applied to me to some degree, or some of the time	Applied to me very much or most of the time	Applied to me to some degree, or some of the time	Applied to me very much or most of the time	Did not apply to me at all	Applied to me very much or most of the time	Applied to me very much or most of the time	Applied to me to a considerable degree or a good part of time	Applied to me very much or most of the time	Applied to me to a considerable degree or a good part of time	Applied to me very much or most of the time	Applied to me very much or most of the time	Applied to me very much or most of the time	Applied to me very much or most of the time	Applied to me to a considerable degree or a good part of time	Applied to me very much or most of the time	Applied to me to some degree, or some of the time	Applied to me to a considerable degree or a good part of time	Did not apply to me at all
22	Male	Medical	4	Non-smoker	Occasional	2	2	Several days	Several days	Several days	Several days	Several days	Several days	Several days	Several days	Several days	Applied to me very much or most of the time	Applied to me to a considerable degree or a good part of time	Applied to me to some degree, or some of the time	Applied to me to some degree, or some of the time	Applied to me to some degree, or some of the time	Applied to me to a considerable degree or a good part of time	Applied to me to a considerable degree or a good part of time	Did not apply to me at all	Applied to me to a considerable degree or a good part of time	Applied to me to a considerable degree or a good part of time	Applied to me to a considerable degree or a good part of time	Applied to me to some degree, or some of the time	Applied to me to a considerable degree or a good part of time	Applied to me to some degree, or some of the time	Applied to me to a considerable degree or a good part of time	Applied to me to some degree, or some of the time	Applied to me to a considerable degree or a good part of time	Did not apply to me at all	Applied to me to some degree, or some of the time	Applied to me to some degree, or some of the time	Applied to me to a considerable degree or a good part of time
22	Male	Medical	4	Current smoker	Regular	10	1	Several days	Several days	Several days	Several days	Several days	Several days	Several days	Several days	Several days	Applied to me to some degree, or some of the time	Applied to me to some degree, or some of the time	Applied to me to some degree, or some of the time	Applied to me to some degree, or some of the time	Applied to me to some degree, or some of the time	Applied to me to some degree, or some of the time	Applied to me to some degree, or some of the time	Applied to me to some degree, or some of the time	Applied to me to some degree, or some of the time	Applied to me to some degree, or some of the time	Applied to me to some degree, or some of the time	Applied to me to some degree, or some of the time	Applied to me to some degree, or some of the time	Applied to me to some degree, or some of the time	Applied to me to some degree, or some of the time	Applied to me to some degree, or some of the time	Applied to me to some degree, or some of the time	Applied to me to some degree, or some of the time	Applied to me to some degree, or some of the time	Applied to me to some degree, or some of the time	Applied to me to some degree, or some of the time
21	Male	Medical	4	Non-smoker	None	6	6	Nearly every day	Nearly every day	Several days	Several days	Several days	More than half the days	More than half the days	Not at all	Not at all	Applied to me to some degree, or some of the time	Did not apply to me at all	Did not apply to me at all	Did not apply to me at all	Applied to me very much or most of the time	Applied to me to some degree, or some of the time	Did not apply to me at all	Applied to me to some degree, or some of the time	Did not apply to me at all	Applied to me to a considerable degree or a good part of time	Did not apply to me at all	Did not apply to me at all	Applied to me to a considerable degree or a good part of time	Applied to me to some degree, or some of the time	Applied to me to some degree, or some of the time	Applied to me to a considerable degree or a good part of time	Applied to me to a considerable degree or a good part of time	Did not apply to me at all	Applied to me to some degree, or some of the time	Did not apply to me at all	Applied to me very much or most of the time
20	Male	Medical	3	Non-smoker	None	1	6	Not at all	Not at all	Not at all	Not at all	Not at all	Not at all	Not at all	Not at all	Not at all	Did not apply to me at all	Did not apply to me at all	Did not apply to me at all	Did not apply to me at all	Did not apply to me at all	Did not apply to me at all	Did not apply to me at all	Did not apply to me at all	Did not apply to me at all	Did not apply to me at all	Did not apply to me at all	Did not apply to me at all	Did not apply to me at all	Did not apply to me at all	Did not apply to me at all	Did not apply to me at all	Did not apply to me at all	Did not apply to me at all	Did not apply to me at all	Did not apply to me at all	Did not apply to me at all
23	Male	Medical	5	Non-smoker	None	3	6	Several days	Several days	Several days	Several days	Several days	Several days	Several days	Not at all	Not at all	Applied to me to some degree, or some of the time	Applied to me to some degree, or some of the time	Did not apply to me at all	Did not apply to me at all	Applied to me to some degree, or some of the time	Applied to me to a considerable degree or a good part of time	Did not apply to me at all	Applied to me to some degree, or some of the time	Applied to me to some degree, or some of the time	Applied to me to some degree, or some of the time	Applied to me to some degree, or some of the time	Applied to me to a considerable degree or a good part of time	Applied to me to some degree, or some of the time	Applied to me to some degree, or some of the time	Applied to me to some degree, or some of the time	Applied to me to some degree, or some of the time	Applied to me to some degree, or some of the time	Applied to me to some degree, or some of the time	Did not apply to me at all	Did not apply to me at all	Did not apply to me at all
19	Male	Medical	3	Former smoker	None	3	6	Not at all	Several days	Several days	Not at all	Not at all	More than half the days	Not at all	Not at all	Several days	Did not apply to me at all	Did not apply to me at all	Did not apply to me at all	Did not apply to me at all	Applied to me to a considerable degree or a good part of time	Applied to me to some degree, or some of the time	Did not apply to me at all	Did not apply to me at all	Did not apply to me at all	Applied to me to some degree, or some of the time	Applied to me to some degree, or some of the time	Did not apply to me at all	Applied to me to some degree, or some of the time	Applied to me to some degree, or some of the time	Did not apply to me at all	Applied to me to some degree, or some of the time	Applied to me to some degree, or some of the time	Applied to me to some degree, or some of the time	Did not apply to me at all	Did not apply to me at all	Applied to me to some degree, or some of the time
18	Female	Medical	1	Non-smoker	None	8	4	More than half the days	Nearly every day	Nearly every day	Nearly every day	More than half the days	More than half the days	More than half the days	Nearly every day	More than half the days	Applied to me to some degree, or some of the time	Applied to me to a considerable degree or a good part of time	Applied to me to a considerable degree or a good part of time	Applied to me to a considerable degree or a good part of time	Applied to me very much or most of the time	Applied to me to a considerable degree or a good part of time	Applied to me very much or most of the time	Applied to me very much or most of the time	Applied to me very much or most of the time	Applied to me to a considerable degree or a good part of time	Applied to me to a considerable degree or a good part of time	Applied to me to a considerable degree or a good part of time	Applied to me very much or most of the time	Applied to me to a considerable degree or a good part of time	Applied to me very much or most of the time	Applied to me to a considerable degree or a good part of time	Applied to me to some degree, or some of the time	Applied to me to a considerable degree or a good part of time	Applied to me very much or most of the time	Applied to me to a considerable degree or a good part of time	Applied to me to a considerable degree or a good part of time
21	Male	Medical	2	Current smoker	None	6	6	Several days	Several days	Several days	Several days	Not at all	Not at all	Not at all	Several days	Not at all	Did not apply to me at all	Applied to me very much or most of the time	Did not apply to me at all	Did not apply to me at all	Applied to me to a considerable degree or a good part of time	Applied to me very much or most of the time	Applied to me very much or most of the time	Applied to me to a considerable degree or a good part of time	Did not apply to me at all	Did not apply to me at all	Applied to me to some degree, or some of the time	Applied to me very much or most of the time	Applied to me to some degree, or some of the time	Applied to me to some degree, or some of the time	Applied to me to some degree, or some of the time	Applied to me to a considerable degree or a good part of time	Applied to me to some degree, or some of the time	Did not apply to me at all	Did not apply to me at all	Did not apply to me at all	Applied to me to some degree, or some of the time
18	Female	Medical	2	Former smoker	Occasional	10	6	Nearly every day	More than half the days	More than half the days	More than half the days	Several days	Several days	More than half the days	Several days	More than half the days	Applied to me very much or most of the time	Applied to me to a considerable degree or a good part of time	Applied to me to a considerable degree or a good part of time	Applied to me to a considerable degree or a good part of time	Applied to me to a considerable degree or a good part of time	Applied to me to a considerable degree or a good part of time	Applied to me to some degree, or some of the time	Applied to me to a considerable degree or a good part of time	Applied to me to a considerable degree or a good part of time	Applied to me very much or most of the time	Applied to me very much or most of the time	Applied to me to a considerable degree or a good part of time	Applied to me to a considerable degree or a good part of time	Applied to me to a considerable degree or a good part of time	Applied to me to a considerable degree or a good part of time	Applied to me to a considerable degree or a good part of time	Applied to me very much or most of the time	Applied to me to a considerable degree or a good part of time	Applied to me very much or most of the time	Applied to me to some degree, or some of the time	Applied to me to a considerable degree or a good part of time
21	Female	Non-medical	4	Non-smoker	None	5	3	More than half the days	Several days	Nearly every day	Several days	Several days	Not at all	Not at all	Not at all	Not at all	Applied to me to some degree, or some of the time	Applied to me to some degree, or some of the time	Applied to me to some degree, or some of the time	Did not apply to me at all	Applied to me to some degree, or some of the time	Applied to me to a considerable degree or a good part of time	Did not apply to me at all	Did not apply to me at all	Applied to me to some degree, or some of the time	Did not apply to me at all	Applied to me to a considerable degree or a good part of time	Applied to me to some degree, or some of the time	Applied to me to some degree, or some of the time	Applied to me to some degree, or some of the time	Did not apply to me at all	Did not apply to me at all	Did not apply to me at all	Applied to me to a considerable degree or a good part of time	Applied to me to some degree, or some of the time	Did not apply to me at all	Applied to me to some degree, or some of the time
22	Male	Medical	4	Former smoker	None	3	7	Several days	Not at all	Several days	Several days	Several days	Not at all	More than half the days	Several days	Not at all	Did not apply to me at all	Applied to me to some degree, or some of the time	Did not apply to me at all	Did not apply to me at all	Applied to me to a considerable degree or a good part of time	Did not apply to me at all	Did not apply to me at all	Did not apply to me at all	Did not apply to me at all	Applied to me to some degree, or some of the time	Did not apply to me at all	Applied to me to some degree, or some of the time	Did not apply to me at all	Did not apply to me at all	Did not apply to me at all	Applied to me to a considerable degree or a good part of time	Did not apply to me at all	Did not apply to me at all	Applied to me to some degree, or some of the time	Did not apply to me at all	Did not apply to me at all
21	Female	Medical	3	Non-smoker	None	7	5	More than half the days	Not at all	Not at all	Not at all	Not at all	Not at all	Not at all	Not at all	Not at all	Did not apply to me at all	Did not apply to me at all	Did not apply to me at all	Did not apply to me at all	Did not apply to me at all	Did not apply to me at all	Did not apply to me at all	Did not apply to me at all	Did not apply to me at all	Did not apply to me at all	Did not apply to me at all	Did not apply to me at all	Applied to me to some degree, or some of the time	Applied to me to some degree, or some of the time	Did not apply to me at all	Did not apply to me at all	Did not apply to me at all	Did not apply to me at all	Did not apply to me at all	Did not apply to me at all	Did not apply to me at all
19	Female	Medical	3	Non-smoker	None	1	7	Several days	Several days	Several days	Several days	Several days	Several days	Several days	Several days	Several days	Applied to me to some degree, or some of the time	Applied to me to a considerable degree or a good part of time	Applied to me to some degree, or some of the time	Applied to me to some degree, or some of the time	Applied to me to some degree, or some of the time	Applied to me to a considerable degree or a good part of time	Applied to me to some degree, or some of the time	Applied to me to some degree, or some of the time	Applied to me to some degree, or some of the time	Applied to me to some degree, or some of the time	Applied to me to a considerable degree or a good part of time	Applied to me to some degree, or some of the time	Applied to me to some degree, or some of the time	Applied to me to some degree, or some of the time	Applied to me to some degree, or some of the time	Applied to me to some degree, or some of the time	Applied to me to some degree, or some of the time	Applied to me to a considerable degree or a good part of time	Applied to me to some degree, or some of the time	Applied to me to some degree, or some of the time	Applied to me to some degree, or some of the time
19	Female	Medical	2	Non-smoker	None	7	6	Several days	Several days	Not at all	More than half the days	Not at all	Not at all	Not at all	Not at all	Not at all	Did not apply to me at all	Applied to me to some degree, or some of the time	Did not apply to me at all	Did not apply to me at all	Did not apply to me at all	Did not apply to me at all	Did not apply to me at all	Did not apply to me at all	Did not apply to me at all	Did not apply to me at all	Did not apply to me at all	Did not apply to me at all	Did not apply to me at all	Did not apply to me at all	Applied to me to some degree, or some of the time	Did not apply to me at all	Did not apply to me at all	Did not apply to me at all	Did not apply to me at all	Did not apply to me at all	Did not apply to me at all
20	Female	Medical	4	Non-smoker	None	6	7	Not at all	Several days	More than half the days	Several days	More than half the days	Nearly every day	Not at all	Several days	Not at all	Applied to me to some degree, or some of the time	Did not apply to me at all	Applied to me to some degree, or some of the time	Applied to me to some degree, or some of the time	Applied to me to some degree, or some of the time	Applied to me to some degree, or some of the time	Did not apply to me at all	Applied to me to some degree, or some of the time	Applied to me to some degree, or some of the time	Applied to me to some degree, or some of the time	Applied to me to some degree, or some of the time	Applied to me to some degree, or some of the time	Applied to me to some degree, or some of the time	Applied to me to some degree, or some of the time	Did not apply to me at all	Applied to me to some degree, or some of the time	Applied to me to some degree, or some of the time	Applied to me very much or most of the time	Did not apply to me at all	Applied to me to some degree, or some of the time	Did not apply to me at all
22	Female	Non-medical	4	Non-smoker	None	7	6	Several days	Several days	Several days	More than half the days	Several days	Several days	Several days	More than half the days	Not at all	Applied to me to some degree, or some of the time	Applied to me to a considerable degree or a good part of time	Applied to me to some degree, or some of the time	Applied to me to a considerable degree or a good part of time	Applied to me very much or most of the time	Applied to me to a considerable degree or a good part of time	Applied to me to some degree, or some of the time	Applied to me to a considerable degree or a good part of time	Applied to me to a considerable degree or a good part of time	Applied to me to some degree, or some of the time	Applied to me to a considerable degree or a good part of time	Applied to me to some degree, or some of the time	Applied to me to a considerable degree or a good part of time	Applied to me to a considerable degree or a good part of time	Applied to me to a considerable degree or a good part of time	Applied to me to some degree, or some of the time	Applied to me to some degree, or some of the time	Applied to me very much or most of the time	Applied to me to a considerable degree or a good part of time	Applied to me to a considerable degree or a good part of time	Applied to me to a considerable degree or a good part of time
21	Female	Medical	5	Non-smoker	None	6	4	Several days	Several days	More than half the days	More than half the days	Several days	More than half the days	Several days	Several days	More than half the days	Applied to me to some degree, or some of the time	Applied to me to some degree, or some of the time	Applied to me to a considerable degree or a good part of time	Did not apply to me at all	Applied to me to some degree, or some of the time	Applied to me to some degree, or some of the time	Did not apply to me at all	Did not apply to me at all	Did not apply to me at all	Applied to me to some degree, or some of the time	Did not apply to me at all	Did not apply to me at all	Applied to me to a considerable degree or a good part of time	Did not apply to me at all	Applied to me to some degree, or some of the time	Applied to me to some degree, or some of the time	Applied to me to a considerable degree or a good part of time	Applied to me to a considerable degree or a good part of time	Applied to me to a considerable degree or a good part of time	Applied to me to some degree, or some of the time	Applied to me to a considerable degree or a good part of time
20	Female	Medical	4	Non-smoker	None	2	3	Several days	Not at all	More than half the days	Several days	Several days	Several days	Several days	Several days	Not at all	Did not apply to me at all	Applied to me to some degree, or some of the time	Applied to me to some degree, or some of the time	Applied to me to some degree, or some of the time	Applied to me to some degree, or some of the time	Did not apply to me at all	Did not apply to me at all	Did not apply to me at all	Applied to me to some degree, or some of the time	Applied to me to some degree, or some of the time	Applied to me to some degree, or some of the time	Applied to me to some degree, or some of the time	Applied to me to some degree, or some of the time	Did not apply to me at all	Did not apply to me at all	Did not apply to me at all	Did not apply to me at all	Applied to me to some degree, or some of the time	Applied to me to some degree, or some of the time	Did not apply to me at all	Did not apply to me at all
28	Male	Non-medical	5	Non-smoker	None	9	6	More than half the days	Several days	Not at all	Several days	Several days	More than half the days	Several days	Not at all	Not at all	Did not apply to me at all	Did not apply to me at all	Applied to me to some degree, or some of the time	Did not apply to me at all	Applied to me to some degree, or some of the time	Applied to me to some degree, or some of the time	Applied to me to a considerable degree or a good part of time	Applied to me to a considerable degree or a good part of time	Applied to me to some degree, or some of the time	Applied to me to some degree, or some of the time	Applied to me to some degree, or some of the time	Applied to me to a considerable degree or a good part of time	Applied to me to a considerable degree or a good part of time	Applied to me to some degree, or some of the time	Applied to me to a considerable degree or a good part of time	Applied to me to some degree, or some of the time	Applied to me to some degree, or some of the time	Applied to me to a considerable degree or a good part of time	Applied to me to a considerable degree or a good part of time	Applied to me to some degree, or some of the time	Applied to me to some degree, or some of the time
23	Female	Medical	4	Non-smoker	None	5	4	More than half the days	More than half the days	Nearly every day	More than half the days	Nearly every day	Several days	Nearly every day	Nearly every day	Not at all	Applied to me to some degree, or some of the time	Did not apply to me at all	Did not apply to me at all	Did not apply to me at all	Applied to me very much or most of the time	Applied to me very much or most of the time	Applied to me to some degree, or some of the time	Applied to me to some degree, or some of the time	Applied to me very much or most of the time	Applied to me to some degree, or some of the time	Applied to me very much or most of the time	Applied to me very much or most of the time	Applied to me to some degree, or some of the time	Applied to me very much or most of the time	Applied to me to some degree, or some of the time	Applied to me to a considerable degree or a good part of time	Applied to me to some degree, or some of the time	Applied to me to a considerable degree or a good part of time	Applied to me to a considerable degree or a good part of time	Applied to me to some degree, or some of the time	Applied to me to some degree, or some of the time
23	Female	Non-medical	4	Non-smoker	None	8	6	Several days	More than half the days	Several days	Nearly every day	Several days	Nearly every day	Nearly every day	Nearly every day	Nearly every day	Applied to me to some degree, or some of the time	Applied to me to some degree, or some of the time	Applied to me to some degree, or some of the time	Applied to me to some degree, or some of the time	Applied to me to some degree, or some of the time	Applied to me to some degree, or some of the time	Applied to me to some degree, or some of the time	Applied to me to some degree, or some of the time	Applied to me to some degree, or some of the time	Applied to me to some degree, or some of the time	Applied to me to some degree, or some of the time	Applied to me to some degree, or some of the time	Applied to me to some degree, or some of the time	Applied to me to some degree, or some of the time	Applied to me to some degree, or some of the time	Applied to me to some degree, or some of the time	Applied to me to some degree, or some of the time	Applied to me to some degree, or some of the time	Applied to me to some degree, or some of the time	Applied to me to some degree, or some of the time	Applied to me to some degree, or some of the time
21	Female	Non-medical	3	Non-smoker	None	7	6	Several days	Several days	Several days	Several days	More than half the days	Several days	Not at all	Not at all	Not at all	Applied to me to some degree, or some of the time	Applied to me to some degree, or some of the time	Did not apply to me at all	Applied to me to a considerable degree or a good part of time	Applied to me to some degree, or some of the time	Applied to me to some degree, or some of the time	Applied to me to some degree, or some of the time	Applied to me to a considerable degree or a good part of time	Applied to me to a considerable degree or a good part of time	Applied to me to a considerable degree or a good part of time	Applied to me to a considerable degree or a good part of time	Applied to me to a considerable degree or a good part of time	Applied to me to a considerable degree or a good part of time	Applied to me to some degree, or some of the time	Applied to me to some degree, or some of the time	Applied to me to some degree, or some of the time	Applied to me to a considerable degree or a good part of time	Applied to me very much or most of the time	Applied to me to a considerable degree or a good part of time	Did not apply to me at all	Did not apply to me at all
22	Female	Non-medical	4	Non-smoker	None	4	5	Several days	Several days	Nearly every day	Several days	Several days	Several days	More than half the days	Not at all	Not at all	Applied to me to some degree, or some of the time	Did not apply to me at all	Applied to me to some degree, or some of the time	Applied to me to some degree, or some of the time	Applied to me to a considerable degree or a good part of time	Did not apply to me at all	Did not apply to me at all	Applied to me to a considerable degree or a good part of time	Applied to me to some degree, or some of the time	Applied to me to some degree, or some of the time	Applied to me to some degree, or some of the time	Applied to me to some degree, or some of the time	Applied to me to some degree, or some of the time	Did not apply to me at all	Applied to me to some degree, or some of the time	Applied to me to some degree, or some of the time	Applied to me to some degree, or some of the time	Applied to me to some degree, or some of the time	Did not apply to me at all	Applied to me to some degree, or some of the time	Did not apply to me at all
21	Female	Non-medical	3	Non-smoker	None	4	7	Several days	More than half the days	Not at all	Nearly every day	Not at all	Not at all	Not at all	More than half the days	Not at all	Applied to me to some degree, or some of the time	Applied to me to some degree, or some of the time	Did not apply to me at all	Applied to me to a considerable degree or a good part of time	Applied to me to a considerable degree or a good part of time	Applied to me to some degree, or some of the time	Applied to me to some degree, or some of the time	Applied to me to a considerable degree or a good part of time	Applied to me to some degree, or some of the time	Did not apply to me at all	Applied to me to some degree, or some of the time	Applied to me to some degree, or some of the time	Applied to me to a considerable degree or a good part of time	Applied to me to some degree, or some of the time	Applied to me to a considerable degree or a good part of time	Applied to me to a considerable degree or a good part of time	Did not apply to me at all	Did not apply to me at all	Applied to me to a considerable degree or a good part of time	Applied to me to a considerable degree or a good part of time	Applied to me to some degree, or some of the time
22	Male	Non-medical	2	Non-smoker	None	2	7	Nearly every day	Several days	Several days	More than half the days	Not at all	Several days	More than half the days	Not at all	Not at all	Applied to me to some degree, or some of the time	Did not apply to me at all	Applied to me to some degree, or some of the time	Did not apply to me at all	Did not apply to me at all	Applied to me to some degree, or some of the time	Did not apply to me at all	Did not apply to me at all	Did not apply to me at all	Did not apply to me at all	Did not apply to me at all	Did not apply to me at all	Did not apply to me at all	Did not apply to me at all	Did not apply to me at all	Applied to me to some degree, or some of the time	Applied to me to some degree, or some of the time	Did not apply to me at all	Did not apply to me at all	Did not apply to me at all	Applied to me to a considerable degree or a good part of time
22	Female	Medical	4	Non-smoker	None	2	9	Not at all	Not at all	Not at all	Not at all	Not at all	Not at all	Not at all	Not at all	Not at all	Did not apply to me at all	Did not apply to me at all	Did not apply to me at all	Did not apply to me at all	Did not apply to me at all	Did not apply to me at all	Did not apply to me at all	Did not apply to me at all	Did not apply to me at all	Did not apply to me at all	Did not apply to me at all	Did not apply to me at all	Did not apply to me at all	Did not apply to me at all	Did not apply to me at all	Did not apply to me at all	Did not apply to me at all	Did not apply to me at all	Did not apply to me at all	Did not apply to me at all	Did not apply to me at all
16	Male	Medical	4	Current smoker	None	1	3	Several days	More than half the days	Nearly every day	More than half the days	More than half the days	Several days	Not at all	Several days	Not at all	Did not apply to me at all	Did not apply to me at all	Applied to me to a considerable degree or a good part of time	Did not apply to me at all	Applied to me to some degree, or some of the time	Did not apply to me at all	Applied to me very much or most of the time	Did not apply to me at all	Did not apply to me at all	Did not apply to me at all	Applied to me very much or most of the time	Did not apply to me at all	Applied to me very much or most of the time	Did not apply to me at all	Applied to me to a considerable degree or a good part of time	Applied to me to some degree, or some of the time	Applied to me very much or most of the time	Did not apply to me at all	Did not apply to me at all	Applied to me very much or most of the time	Did not apply to me at all
23	Male	Medical	4	Former smoker	None	7	5	Several days	More than half the days	More than half the days	Several days	More than half the days	More than half the days	Several days	Not at all	Several days	Applied to me to some degree, or some of the time	Did not apply to me at all	Did not apply to me at all	Did not apply to me at all	Did not apply to me at all	Applied to me to a considerable degree or a good part of time	Did not apply to me at all	Applied to me to some degree, or some of the time	Applied to me to some degree, or some of the time	Did not apply to me at all	Applied to me to a considerable degree or a good part of time	Applied to me to some degree, or some of the time	Applied to me to some degree, or some of the time	Applied to me to some degree, or some of the time	Applied to me to some degree, or some of the time	Applied to me to some degree, or some of the time	Did not apply to me at all	Applied to me to some degree, or some of the time	Did not apply to me at all	Applied to me to some degree, or some of the time	Applied to me to some degree, or some of the time
23	Male	Medical	4	Non-smoker	None	10	5	Several days	Several days	Several days	Several days	More than half the days	More than half the days	More than half the days	Nearly every day	More than half the days	Applied to me to some degree, or some of the time	Did not apply to me at all	Did not apply to me at all	Did not apply to me at all	Did not apply to me at all	Did not apply to me at all	Did not apply to me at all	Did not apply to me at all	Did not apply to me at all	Did not apply to me at all	Did not apply to me at all	Did not apply to me at all	Did not apply to me at all	Did not apply to me at all	Did not apply to me at all	Did not apply to me at all	Did not apply to me at all	Did not apply to me at all	Applied to me to some degree, or some of the time	Did not apply to me at all	Did not apply to me at all
19	Male	Medical	1	Non-smoker	None	7	5	Several days	More than half the days	More than half the days	More than half the days	Several days	More than half the days	Several days	Several days	Several days	Applied to me to some degree, or some of the time	Applied to me to some degree, or some of the time	Applied to me to a considerable degree or a good part of time	Applied to me to a considerable degree or a good part of time	Applied to me to a considerable degree or a good part of time	Applied to me to a considerable degree or a good part of time	Applied to me to a considerable degree or a good part of time	Applied to me to a considerable degree or a good part of time	Applied to me to some degree, or some of the time	Applied to me to some degree, or some of the time	Applied to me to a considerable degree or a good part of time	Applied to me to some degree, or some of the time	Applied to me to a considerable degree or a good part of time	Applied to me very much or most of the time	Applied to me to some degree, or some of the time	Applied to me to some degree, or some of the time	Applied to me to some degree, or some of the time	Applied to me to some degree, or some of the time	Applied to me to some degree, or some of the time	Applied to me to some degree, or some of the time	Applied to me to some degree, or some of the time
23	Female	Medical	5	Non-smoker	None	7	5	Several days	More than half the days	Nearly every day	More than half the days	Several days	More than half the days	Nearly every day	Not at all	Several days	Applied to me to some degree, or some of the time	Applied to me very much or most of the time	Applied to me very much or most of the time	Applied to me very much or most of the time	Applied to me very much or most of the time	Applied to me very much or most of the time	Applied to me very much or most of the time	Applied to me very much or most of the time	Applied to me to a considerable degree or a good part of time	Applied to me very much or most of the time	Applied to me very much or most of the time	Applied to me to some degree, or some of the time	Applied to me very much or most of the time	Applied to me very much or most of the time	Applied to me to a considerable degree or a good part of time	Applied to me to a considerable degree or a good part of time	Applied to me to some degree, or some of the time	Applied to me very much or most of the time	Applied to me very much or most of the time	Applied to me very much or most of the time	Did not apply to me at all
22	Female	Medical	3	Non-smoker	None	5	8	More than half the days	More than half the days	Nearly every day	Nearly every day	Nearly every day	Several days	Several days	Not at all	Several days	Applied to me to some degree, or some of the time	Applied to me to some degree, or some of the time	Did not apply to me at all	Applied to me to some degree, or some of the time	Applied to me to some degree, or some of the time	Applied to me to a considerable degree or a good part of time	Applied to me to some degree, or some of the time	Applied to me to a considerable degree or a good part of time	Applied to me to some degree, or some of the time	Did not apply to me at all	Applied to me to some degree, or some of the time	Applied to me to some degree, or some of the time	Applied to me to some degree, or some of the time	Applied to me to some degree, or some of the time	Applied to me to some degree, or some of the time	Applied to me to some degree, or some of the time	Did not apply to me at all	Applied to me to some degree, or some of the time	Applied to me to some degree, or some of the time	Did not apply to me at all	Applied to me to some degree, or some of the time
23	Male	Non-medical	5	Former smoker	Occasional	10	2	More than half the days	More than half the days	Several days	Not at all	Not at all	Several days	More than half the days	Nearly every day	Not at all	Applied to me very much or most of the time	Applied to me very much or most of the time	Applied to me to some degree, or some of the time	Applied to me to some degree, or some of the time	Applied to me to some degree, or some of the time	Applied to me very much or most of the time	Did not apply to me at all	Applied to me to some degree, or some of the time	Applied to me to a considerable degree or a good part of time	Applied to me to a considerable degree or a good part of time	Did not apply to me at all	Applied to me very much or most of the time	Applied to me to a considerable degree or a good part of time	Applied to me very much or most of the time	Applied to me to some degree, or some of the time	Applied to me very much or most of the time	Did not apply to me at all	Applied to me very much or most of the time	Did not apply to me at all	Applied to me very much or most of the time	Applied to me very much or most of the time
21	Male	Medical	4	Non-smoker	None	8	6	Several days	Several days	Several days	Nearly every day	Several days	Nearly every day	Several days	Not at all	Several days	Applied to me to some degree, or some of the time	Applied to me to some degree, or some of the time	Applied to me to some degree, or some of the time	Applied to me to some degree, or some of the time	Applied to me to a considerable degree or a good part of time	Applied to me to some degree, or some of the time	Applied to me to a considerable degree or a good part of time	Applied to me to some degree, or some of the time	Applied to me to some degree, or some of the time	Applied to me to a considerable degree or a good part of time	Applied to me to some degree, or some of the time	Applied to me to some degree, or some of the time	Applied to me to a considerable degree or a good part of time	Did not apply to me at all	Applied to me to some degree, or some of the time	Applied to me to some degree, or some of the time	Applied to me to a considerable degree or a good part of time	Applied to me to a considerable degree or a good part of time	Applied to me to some degree, or some of the time	Applied to me to a considerable degree or a good part of time	Applied to me to some degree, or some of the time
24	Male	Non-medical	5	Non-smoker	None	3	4	Several days	Several days	Several days	Several days	Several days	Several days	Several days	Several days	Several days	Applied to me to some degree, or some of the time	Applied to me to some degree, or some of the time	Applied to me to a considerable degree or a good part of time	Applied to me to some degree, or some of the time	Applied to me to some degree, or some of the time	Applied to me to some degree, or some of the time	Applied to me to some degree, or some of the time	Applied to me to some degree, or some of the time	Applied to me to some degree, or some of the time	Applied to me to some degree, or some of the time	Did not apply to me at all	Applied to me to some degree, or some of the time	Applied to me to some degree, or some of the time	Applied to me to some degree, or some of the time	Applied to me to some degree, or some of the time	Applied to me to some degree, or some of the time	Applied to me to some degree, or some of the time	Applied to me to some degree, or some of the time	Applied to me to some degree, or some of the time	Applied to me to some degree, or some of the time	Applied to me to some degree, or some of the time
19	Female	Non-medical	1	Non-smoker	None	5	8	Nearly every day	Not at all	Not at all	Not at all	Several days	Several days	Not at all	Not at all	Not at all	Applied to me to some degree, or some of the time	Applied to me to some degree, or some of the time	Did not apply to me at all	Applied to me to a considerable degree or a good part of time	Applied to me to a considerable degree or a good part of time	Applied to me to a considerable degree or a good part of time	Applied to me to some degree, or some of the time	Applied to me to a considerable degree or a good part of time	Applied to me very much or most of the time	Applied to me to a considerable degree or a good part of time	Applied to me to some degree, or some of the time	Did not apply to me at all	Applied to me very much or most of the time	Did not apply to me at all	Applied to me to some degree, or some of the time	Applied to me very much or most of the time	Did not apply to me at all	Applied to me to a considerable degree or a good part of time	Applied to me to a considerable degree or a good part of time	Applied to me to a considerable degree or a good part of time	Applied to me to some degree, or some of the time
24	Male	Medical	3	Non-smoker	None	6	6	Several days	Not at all	Several days	Nearly every day	Several days	Not at all	Several days	Several days	Not at all	Applied to me to a considerable degree or a good part of time	Applied to me to some degree, or some of the time	Applied to me to some degree, or some of the time	Did not apply to me at all	Did not apply to me at all	Did not apply to me at all	Did not apply to me at all	Applied to me to some degree, or some of the time	Applied to me to some degree, or some of the time	Applied to me very much or most of the time	Applied to me to some degree, or some of the time	Applied to me to some degree, or some of the time	Applied to me to a considerable degree or a good part of time	Applied to me to a considerable degree or a good part of time	Applied to me to some degree, or some of the time	Applied to me to some degree, or some of the time	Applied to me to some degree, or some of the time	Did not apply to me at all	Did not apply to me at all	Applied to me to some degree, or some of the time	Applied to me to some degree, or some of the time
28	Male	Non-medical	2	Non-smoker	None	4	6	Several days	Several days	More than half the days	Several days	Several days	Not at all	Several days	Not at all	Several days	Applied to me to some degree, or some of the time	Did not apply to me at all	Applied to me to a considerable degree or a good part of time	Did not apply to me at all	Applied to me to some degree, or some of the time	Applied to me to some degree, or some of the time	Did not apply to me at all	Did not apply to me at all	Applied to me to some degree, or some of the time	Applied to me to a considerable degree or a good part of time	Applied to me to a considerable degree or a good part of time	Applied to me to some degree, or some of the time	Did not apply to me at all	Did not apply to me at all	Did not apply to me at all	Applied to me to some degree, or some of the time	Applied to me to some degree, or some of the time	Applied to me to some degree, or some of the time	Applied to me to a considerable degree or a good part of time	Applied to me to some degree, or some of the time	Did not apply to me at all
21	Female	Non-medical	2	Non-smoker	None	3	6	Not at all	Not at all	Several days	Not at all	Several days	Not at all	Not at all	Not at all	Not at all	Did not apply to me at all	Did not apply to me at all	Did not apply to me at all	Did not apply to me at all	Applied to me to some degree, or some of the time	Did not apply to me at all	Did not apply to me at all	Did not apply to me at all	Applied to me to some degree, or some of the time	Applied to me to some degree, or some of the time	Did not apply to me at all	Applied to me to some degree, or some of the time	Applied to me to some degree, or some of the time	Did not apply to me at all	Applied to me to some degree, or some of the time	Applied to me to some degree, or some of the time	Did not apply to me at all	Applied to me to some degree, or some of the time	Did not apply to me at all	Did not apply to me at all	Did not apply to me at all
21	Female	Medical	2	Non-smoker	None	6	6	Several days	Several days	More than half the days	More than half the days	Several days	Not at all	Several days	Not at all	Several days	Applied to me to some degree, or some of the time	Applied to me to some degree, or some of the time	Applied to me to some degree, or some of the time	Did not apply to me at all	Applied to me to a considerable degree or a good part of time	Applied to me to some degree, or some of the time	Applied to me to some degree, or some of the time	Applied to me to a considerable degree or a good part of time	Applied to me to some degree, or some of the time	Applied to me to some degree, or some of the time	Applied to me to some degree, or some of the time	Applied to me to some degree, or some of the time	Applied to me to a considerable degree or a good part of time	Applied to me to a considerable degree or a good part of time	Applied to me to a considerable degree or a good part of time	Applied to me to some degree, or some of the time	Did not apply to me at all	Applied to me to a considerable degree or a good part of time	Did not apply to me at all	Did not apply to me at all	Applied to me to some degree, or some of the time
21	Male	Medical	4	Non-smoker	None	1	7	Not at all	Not at all	Not at all	Not at all	Not at all	Not at all	Not at all	Not at all	Not at all	Did not apply to me at all	Did not apply to me at all	Did not apply to me at all	Did not apply to me at all	Did not apply to me at all	Did not apply to me at all	Did not apply to me at all	Did not apply to me at all	Did not apply to me at all	Did not apply to me at all	Did not apply to me at all	Did not apply to me at all	Did not apply to me at all	Did not apply to me at all	Did not apply to me at all	Did not apply to me at all	Did not apply to me at all	Did not apply to me at all	Did not apply to me at all	Did not apply to me at all	Did not apply to me at all
25	Male	Non-medical	4	Non-smoker	None	5	8	Not at all	Several days	Several days	Several days	Several days	More than half the days	Several days	Several days	Not at all	Applied to me to some degree, or some of the time	Did not apply to me at all	Applied to me to some degree, or some of the time	Applied to me to some degree, or some of the time	Applied to me to some degree, or some of the time	Applied to me to some degree, or some of the time	Did not apply to me at all	Applied to me to some degree, or some of the time	Did not apply to me at all	Applied to me to some degree, or some of the time	Applied to me to some degree, or some of the time	Applied to me to some degree, or some of the time	Applied to me to some degree, or some of the time	Applied to me to some degree, or some of the time	Applied to me to some degree, or some of the time	Applied to me to some degree, or some of the time	Applied to me to some degree, or some of the time	Applied to me to some degree, or some of the time	Applied to me to some degree, or some of the time	Applied to me to some degree, or some of the time	Applied to me to some degree, or some of the time
23	Female	Medical	1	Non-smoker	None	6	6	More than half the days	Nearly every day	More than half the days	Several days	Nearly every day	More than half the days	Several days	Not at all	Not at all	Did not apply to me at all	Applied to me to some degree, or some of the time	Did not apply to me at all	Applied to me to some degree, or some of the time	Applied to me to some degree, or some of the time	Applied to me to some degree, or some of the time	Did not apply to me at all	Applied to me to some degree, or some of the time	Applied to me to some degree, or some of the time	Did not apply to me at all	Applied to me to some degree, or some of the time	Did not apply to me at all	Applied to me to some degree, or some of the time	Did not apply to me at all	Applied to me to some degree, or some of the time	Did not apply to me at all	Did not apply to me at all	Did not apply to me at all	Did not apply to me at all	Applied to me to some degree, or some of the time	Applied to me very much or most of the time
22	Male	Non-medical	3	Non-smoker	None	8	5	Several days	Several days	More than half the days	More than half the days	Nearly every day	Several days	More than half the days	Several days	More than half the days	Applied to me to a considerable degree or a good part of time	Applied to me to a considerable degree or a good part of time	Applied to me to some degree, or some of the time	Applied to me to some degree, or some of the time	Applied to me very much or most of the time	Applied to me to a considerable degree or a good part of time	Applied to me to some degree, or some of the time	Applied to me very much or most of the time	Applied to me very much or most of the time	Applied to me to some degree, or some of the time	Applied to me to a considerable degree or a good part of time	Applied to me very much or most of the time	Applied to me to a considerable degree or a good part of time	Applied to me very much or most of the time	Applied to me to a considerable degree or a good part of time	Applied to me to some degree, or some of the time	Applied to me to some degree, or some of the time	Applied to me very much or most of the time	Applied to me to a considerable degree or a good part of time	Applied to me to some degree, or some of the time	Applied to me to some degree, or some of the time
17	Female	Medical	1	Non-smoker	None	8	4	Not at all	Several days	Nearly every day	Nearly every day	Nearly every day	More than half the days	Several days	Not at all	Several days	Applied to me to a considerable degree or a good part of time	Applied to me to a considerable degree or a good part of time	Applied to me to some degree, or some of the time	Applied to me to a considerable degree or a good part of time	Applied to me very much or most of the time	Applied to me to a considerable degree or a good part of time	Applied to me to a considerable degree or a good part of time	Applied to me very much or most of the time	Applied to me to a considerable degree or a good part of time	Applied to me very much or most of the time	Applied to me to a considerable degree or a good part of time	Applied to me very much or most of the time	Applied to me very much or most of the time	Applied to me to a considerable degree or a good part of time	Applied to me to a considerable degree or a good part of time	Applied to me to a considerable degree or a good part of time	Applied to me very much or most of the time	Applied to me to a considerable degree or a good part of time	Applied to me very much or most of the time	Applied to me very much or most of the time	Applied to me to a considerable degree or a good part of time
23	Male	Non-medical	1	Non-smoker	None	3	8	More than half the days	Not at all	Not at all	Several days	Not at all	Several days	More than half the days	Not at all	Not at all	Applied to me to some degree, or some of the time	Did not apply to me at all	Did not apply to me at all	Did not apply to me at all	Did not apply to me at all	Applied to me to a considerable degree or a good part of time	Did not apply to me at all	Applied to me to some degree, or some of the time	Applied to me to some degree, or some of the time	Applied to me to some degree, or some of the time	Applied to me to some degree, or some of the time	Applied to me to some degree, or some of the time	Applied to me to some degree, or some of the time	Applied to me to some degree, or some of the time	Applied to me to some degree, or some of the time	Did not apply to me at all	Applied to me to some degree, or some of the time	Applied to me to some degree, or some of the time	Applied to me to some degree, or some of the time	Did not apply to me at all	Applied to me to some degree, or some of the time
23	Male	Medical	5	Non-smoker	None	4	8	Nearly every day	Not at all	Not at all	Several days	Not at all	Not at all	More than half the days	Not at all	Not at all	Applied to me to some degree, or some of the time	Applied to me very much or most of the time	Applied to me to some degree, or some of the time	Did not apply to me at all	Applied to me to a considerable degree or a good part of time	Applied to me to some degree, or some of the time	Applied to me to some degree, or some of the time	Applied to me to some degree, or some of the time	Applied to me to some degree, or some of the time	Applied to me to some degree, or some of the time	Applied to me to some degree, or some of the time	Applied to me to some degree, or some of the time	Applied to me to some degree, or some of the time	Applied to me to some degree, or some of the time	Applied to me to some degree, or some of the time	Applied to me to some degree, or some of the time	Applied to me to some degree, or some of the time	Applied to me to some degree, or some of the time	Applied to me to some degree, or some of the time	Applied to me to some degree, or some of the time	Applied to me to a considerable degree or a good part of time
24	Female	Non-medical	4	Former smoker	Occasional	3	6	Not at all	Several days	More than half the days	Several days	Several days	Not at all	Not at all	More than half the days	Not at all	Applied to me to a considerable degree or a good part of time	Applied to me to a considerable degree or a good part of time	Applied to me to some degree, or some of the time	Applied to me to some degree, or some of the time	Did not apply to me at all	Applied to me very much or most of the time	Did not apply to me at all	Applied to me to a considerable degree or a good part of time	Applied to me to a considerable degree or a good part of time	Applied to me to some degree, or some of the time	Did not apply to me at all	Applied to me to some degree, or some of the time	Applied to me to some degree, or some of the time	Applied to me to some degree, or some of the time	Applied to me to a considerable degree or a good part of time	Applied to me to a considerable degree or a good part of time	Applied to me to some degree, or some of the time	Applied to me very much or most of the time	Applied to me to some degree, or some of the time	Did not apply to me at all	Applied to me to a considerable degree or a good part of time
21	Male	Medical	4	Non-smoker	None	5	4	More than half the days	Several days	Nearly every day	More than half the days	Several days	Not at all	Nearly every day	Not at all	Not at all	Did not apply to me at all	Applied to me to some degree, or some of the time	Applied to me to some degree, or some of the time	Applied to me to some degree, or some of the time	Applied to me very much or most of the time	Applied to me to some degree, or some of the time	Did not apply to me at all	Did not apply to me at all	Applied to me to some degree, or some of the time	Did not apply to me at all	Did not apply to me at all	Did not apply to me at all	Applied to me to some degree, or some of the time	Applied to me to some degree, or some of the time	Applied to me to some degree, or some of the time	Applied to me to some degree, or some of the time	Applied to me to some degree, or some of the time	Did not apply to me at all	Did not apply to me at all	Applied to me to some degree, or some of the time	Did not apply to me at all
23	Female	Medical	4	Non-smoker	None	2	6	Not at all	Several days	More than half the days	Several days	Several days	Not at all	Not at all	Not at all	Not at all	Did not apply to me at all	Did not apply to me at all	Did not apply to me at all	Did not apply to me at all	Applied to me to some degree, or some of the time	Applied to me to some degree, or some of the time	Applied to me to some degree, or some of the time	Applied to me to some degree, or some of the time	Applied to me to some degree, or some of the time	Did not apply to me at all	Applied to me to some degree, or some of the time	Did not apply to me at all	Applied to me to some degree, or some of the time	Did not apply to me at all	Applied to me to some degree, or some of the time	Applied to me to some degree, or some of the time	Applied to me to some degree, or some of the time	Applied to me to some degree, or some of the time	Did not apply to me at all	Did not apply to me at all	Did not apply to me at all
18	Male	Non-medical	1	Current smoker	None	7	6	Several days	Nearly every day	Nearly every day	Nearly every day	More than half the days	Nearly every day	Several days	Nearly every day	Nearly every day	Applied to me to some degree, or some of the time	Applied to me to some degree, or some of the time	Applied to me to some degree, or some of the time	Applied to me to some degree, or some of the time	Applied to me to some degree, or some of the time	Applied to me to some degree, or some of the time	Applied to me to some degree, or some of the time	Applied to me to some degree, or some of the time	Applied to me to some degree, or some of the time	Applied to me to some degree, or some of the time	Applied to me to a considerable degree or a good part of time	Applied to me to a considerable degree or a good part of time	Applied to me to a considerable degree or a good part of time	Applied to me to a considerable degree or a good part of time	Applied to me to some degree, or some of the time	Applied to me to some degree, or some of the time	Applied to me to a considerable degree or a good part of time	Did not apply to me at all	Applied to me to some degree, or some of the time	Applied to me to some degree, or some of the time	Applied to me to some degree, or some of the time
22	Female	Medical	4	Non-smoker	None	7	10	Nearly every day	Several days	More than half the days	More than half the days	More than half the days	Not at all	Not at all	Several days	Not at all	Did not apply to me at all	Applied to me to some degree, or some of the time	Applied to me very much or most of the time	Applied to me very much or most of the time	Did not apply to me at all	Did not apply to me at all	Applied to me very much or most of the time	Applied to me very much or most of the time	Applied to me very much or most of the time	Did not apply to me at all	Applied to me to a considerable degree or a good part of time	Applied to me to a considerable degree or a good part of time	Applied to me to some degree, or some of the time	Applied to me to a considerable degree or a good part of time	Applied to me to a considerable degree or a good part of time	Applied to me to a considerable degree or a good part of time	Did not apply to me at all	Applied to me to some degree, or some of the time	Applied to me to a considerable degree or a good part of time	Applied to me to a considerable degree or a good part of time	Did not apply to me at all
23	Female	Medical	4	Non-smoker	None	3	6	Several days	Several days	Several days	Several days	Several days	Several days	Several days	Several days	Several days	Applied to me to some degree, or some of the time	Applied to me to some degree, or some of the time	Applied to me to some degree, or some of the time	Applied to me to some degree, or some of the time	Applied to me to some degree, or some of the time	Applied to me to some degree, or some of the time	Applied to me to some degree, or some of the time	Applied to me to some degree, or some of the time	Applied to me to some degree, or some of the time	Applied to me to some degree, or some of the time	Applied to me to some degree, or some of the time	Applied to me to some degree, or some of the time	Applied to me to some degree, or some of the time	Applied to me to some degree, or some of the time	Applied to me to some degree, or some of the time	Applied to me to some degree, or some of the time	Applied to me to some degree, or some of the time	Applied to me to some degree, or some of the time	Applied to me to some degree, or some of the time	Applied to me to some degree, or some of the time	Applied to me to some degree, or some of the time
21	Female	Medical	4	Non-smoker	None	6	7	Several days	Not at all	Several days	More than half the days	More than half the days	Several days	Several days	Several days	Several days	Did not apply to me at all	Applied to me to some degree, or some of the time	Applied to me to a considerable degree or a good part of time	Applied to me to a considerable degree or a good part of time	Did not apply to me at all	Applied to me to some degree, or some of the time	Applied to me to a considerable degree or a good part of time	Applied to me to a considerable degree or a good part of time	Applied to me to some degree, or some of the time	Applied to me to some degree, or some of the time	Did not apply to me at all	Applied to me to a considerable degree or a good part of time	Did not apply to me at all	Applied to me to some degree, or some of the time	Applied to me to a considerable degree or a good part of time	Did not apply to me at all	Applied to me to a considerable degree or a good part of time	Applied to me to a considerable degree or a good part of time	Applied to me to a considerable degree or a good part of time	Applied to me to a considerable degree or a good part of time	Applied to me to some degree, or some of the time
22	Male	Medical	5	Non-smoker	None	6	6	More than half the days	Several days	Nearly every day	More than half the days	Several days	Several days	Several days	Not at all	Not at all	Did not apply to me at all	Applied to me to some degree, or some of the time	Applied to me to some degree, or some of the time	Applied to me to a considerable degree or a good part of time	Applied to me to a considerable degree or a good part of time	Applied to me to a considerable degree or a good part of time	Applied to me to a considerable degree or a good part of time	Applied to me to a considerable degree or a good part of time	Applied to me to a considerable degree or a good part of time	Applied to me to some degree, or some of the time	Applied to me to a considerable degree or a good part of time	Applied to me to a considerable degree or a good part of time	Applied to me to a considerable degree or a good part of time	Applied to me to a considerable degree or a good part of time	Applied to me to a considerable degree or a good part of time	Applied to me to a considerable degree or a good part of time	Applied to me to some degree, or some of the time	Applied to me to a considerable degree or a good part of time	Applied to me very much or most of the time	Applied to me to some degree, or some of the time	Did not apply to me at all
23	Male	Medical	2	Former smoker	None	5	6	Several days	Several days	Not at all	Not at all	Not at all	Several days	More than half the days	Not at all	Not at all	Did not apply to me at all	Applied to me to some degree, or some of the time	Applied to me to some degree, or some of the time	Applied to me to some degree, or some of the time	Applied to me to some degree, or some of the time	Applied to me to a considerable degree or a good part of time	Applied to me to some degree, or some of the time	Applied to me to some degree, or some of the time	Applied to me to some degree, or some of the time	Applied to me to some degree, or some of the time	Applied to me to some degree, or some of the time	Did not apply to me at all	Did not apply to me at all	Applied to me to some degree, or some of the time	Did not apply to me at all	Applied to me to some degree, or some of the time	Did not apply to me at all	Did not apply to me at all	Did not apply to me at all	Applied to me to some degree, or some of the time	Did not apply to me at all
24	Female	Medical	1	Non-smoker	None	3	8	Several days	Not at all	Nearly every day	Several days	Several days	Not at all	Several days	Not at all	Not at all	Did not apply to me at all	Did not apply to me at all	Applied to me to some degree, or some of the time	Did not apply to me at all	Applied to me to some degree, or some of the time	Applied to me to some degree, or some of the time	Did not apply to me at all	Did not apply to me at all	Did not apply to me at all	Applied to me to some degree, or some of the time	Applied to me to some degree, or some of the time	Did not apply to me at all	Applied to me to some degree, or some of the time	Did not apply to me at all	Did not apply to me at all	Did not apply to me at all	Did not apply to me at all	Applied to me to some degree, or some of the time	Did not apply to me at all	Did not apply to me at all	Did not apply to me at all
21	Female	Medical	4	Non-smoker	None	5	6	Several days	Not at all	Several days	Several days	Several days	Not at all	Not at all	Not at all	Not at all	Did not apply to me at all	Did not apply to me at all	Did not apply to me at all	Did not apply to me at all	Did not apply to me at all	Did not apply to me at all	Did not apply to me at all	Did not apply to me at all	Did not apply to me at all	Did not apply to me at all	Did not apply to me at all	Did not apply to me at all	Did not apply to me at all	Did not apply to me at all	Did not apply to me at all	Did not apply to me at all	Did not apply to me at all	Did not apply to me at all	Did not apply to me at all	Did not apply to me at all	Did not apply to me at all
20	Female	Medical	1	Current smoker	None	1	1	Not at all	Nearly every day	Not at all	Nearly every day	Several days	Not at all	Not at all	Not at all	Not at all	Did not apply to me at all	Did not apply to me at all	Did not apply to me at all	Applied to me to some degree, or some of the time	Did not apply to me at all	Applied to me to some degree, or some of the time	Did not apply to me at all	Did not apply to me at all	Did not apply to me at all	Applied to me to some degree, or some of the time	Applied to me to some degree, or some of the time	Applied to me to a considerable degree or a good part of time	Applied to me to a considerable degree or a good part of time	Applied to me to a considerable degree or a good part of time	Applied to me to a considerable degree or a good part of time	Applied to me to some degree, or some of the time	Did not apply to me at all	Applied to me to some degree, or some of the time	Did not apply to me at all	Did not apply to me at all	Applied to me to some degree, or some of the time
24	Male	Medical	4	Non-smoker	None	5	6	More than half the days	Not at all	Several days	Not at all	Not at all	Not at all	More than half the days	Several days	More than half the days	Applied to me to some degree, or some of the time	Applied to me to a considerable degree or a good part of time	Applied to me very much or most of the time	Did not apply to me at all	Applied to me to some degree, or some of the time	Did not apply to me at all	Applied to me to some degree, or some of the time	Applied to me to a considerable degree or a good part of time	Did not apply to me at all	Applied to me very much or most of the time	Applied to me very much or most of the time	Applied to me to a considerable degree or a good part of time	Applied to me to some degree, or some of the time	Did not apply to me at all	Applied to me to some degree, or some of the time	Applied to me very much or most of the time	Applied to me very much or most of the time	Applied to me to a considerable degree or a good part of time	Applied to me to some degree, or some of the time	Did not apply to me at all	Applied to me to some degree, or some of the time
20	Male	Medical	4	Former smoker	None	10	4	Nearly every day	Nearly every day	Nearly every day	Nearly every day	Nearly every day	Nearly every day	Nearly every day	Nearly every day	Nearly every day	Applied to me to some degree, or some of the time	Applied to me to some degree, or some of the time	Did not apply to me at all	Applied to me very much or most of the time	Applied to me to a considerable degree or a good part of time	Did not apply to me at all	Applied to me to a considerable degree or a good part of time	Applied to me to some degree, or some of the time	Applied to me to a considerable degree or a good part of time	Applied to me to a considerable degree or a good part of time	Applied to me to a considerable degree or a good part of time	Did not apply to me at all	Applied to me to some degree, or some of the time	Applied to me to a considerable degree or a good part of time	Applied to me to some degree, or some of the time	Applied to me to a considerable degree or a good part of time	Applied to me to some degree, or some of the time	Did not apply to me at all	Applied to me to a considerable degree or a good part of time	Applied to me very much or most of the time	Applied to me to a considerable degree or a good part of time
22	Female	Medical	4	Non-smoker	None	8	5	Several days	Nearly every day	Nearly every day	Several days	Nearly every day	Several days	Several days	Several days	Not at all	Applied to me to some degree, or some of the time	Applied to me to some degree, or some of the time	Applied to me to some degree, or some of the time	Applied to me to some degree, or some of the time	Applied to me to some degree, or some of the time	Did not apply to me at all	Applied to me to some degree, or some of the time	Applied to me to some degree, or some of the time	Applied to me to some degree, or some of the time	Applied to me to some degree, or some of the time	Applied to me to some degree, or some of the time	Applied to me to some degree, or some of the time	Applied to me to some degree, or some of the time	Applied to me to some degree, or some of the time	Applied to me to some degree, or some of the time	Applied to me to some degree, or some of the time	Applied to me to some degree, or some of the time	Applied to me to some degree, or some of the time	Applied to me to some degree, or some of the time	Applied to me to some degree, or some of the time	Applied to me to some degree, or some of the time
23	Female	Medical	2	Non-smoker	None	8	7	Several days	More than half the days	Nearly every day	More than half the days	Several days	Several days	Several days	Not at all	Several days	Did not apply to me at all	Applied to me to a considerable degree or a good part of time	Applied to me very much or most of the time	Applied to me to some degree, or some of the time	Applied to me very much or most of the time	Applied to me to a considerable degree or a good part of time	Applied to me to some degree, or some of the time	Applied to me to some degree, or some of the time	Applied to me very much or most of the time	Applied to me to a considerable degree or a good part of time	Applied to me very much or most of the time	Applied to me to a considerable degree or a good part of time	Applied to me to some degree, or some of the time	Applied to me to some degree, or some of the time	Applied to me to a considerable degree or a good part of time	Applied to me to a considerable degree or a good part of time	Applied to me to a considerable degree or a good part of time	Applied to me to a considerable degree or a good part of time	Applied to me to some degree, or some of the time	Applied to me very much or most of the time	Applied to me very much or most of the time
22	Male	Medical	4	Non-smoker	None	3	8	Several days	Not at all	Not at all	More than half the days	Not at all	Not at all	Not at all	Not at all	Not at all	Did not apply to me at all	Applied to me to a considerable degree or a good part of time	Applied to me to some degree, or some of the time	Applied to me to some degree, or some of the time	Applied to me to a considerable degree or a good part of time	Applied to me to some degree, or some of the time	Did not apply to me at all	Applied to me to some degree, or some of the time	Did not apply to me at all	Did not apply to me at all	Did not apply to me at all	Did not apply to me at all	Did not apply to me at all	Did not apply to me at all	Did not apply to me at all	Applied to me to a considerable degree or a good part of time	Did not apply to me at all	Applied to me to a considerable degree or a good part of time	Applied to me to a considerable degree or a good part of time	Did not apply to me at all	Did not apply to me at all
16	Male	Non-medical	1	Non-smoker	None	3	8	Nearly every day	Several days	Several days	Not at all	Not at all	Not at all	Several days	Not at all	Several days	Did not apply to me at all	Applied to me to some degree, or some of the time	Applied to me to a considerable degree or a good part of time	Applied to me to some degree, or some of the time	Applied to me to some degree, or some of the time	Applied to me to a considerable degree or a good part of time	Applied to me to some degree, or some of the time	Applied to me to some degree, or some of the time	Applied to me to some degree, or some of the time	Applied to me to some degree, or some of the time	Applied to me to some degree, or some of the time	Applied to me to a considerable degree or a good part of time	Applied to me to some degree, or some of the time	Applied to me to a considerable degree or a good part of time	Applied to me to a considerable degree or a good part of time	Applied to me to a considerable degree or a good part of time	Applied to me to a considerable degree or a good part of time	Did not apply to me at all	Applied to me to some degree, or some of the time	Applied to me to a considerable degree or a good part of time	Applied to me to some degree, or some of the time
24	Male	Medical	4	Non-smoker	None	4	7	Several days	Several days	Several days	More than half the days	Several days	Several days	Not at all	Not at all	Not at all	Applied to me to a considerable degree or a good part of time	Did not apply to me at all	Applied to me to some degree, or some of the time	Did not apply to me at all	Applied to me to a considerable degree or a good part of time	Did not apply to me at all	Applied to me to some degree, or some of the time	Applied to me to some degree, or some of the time	Applied to me to some degree, or some of the time	Applied to me to some degree, or some of the time	Applied to me to some degree, or some of the time	Applied to me to some degree, or some of the time	Applied to me to some degree, or some of the time	Did not apply to me at all	Did not apply to me at all	Applied to me to some degree, or some of the time	Applied to me to some degree, or some of the time	Did not apply to me at all	Applied to me to some degree, or some of the time	Did not apply to me at all	Applied to me to some degree, or some of the time
22	Female	Medical	4	Non-smoker	None	5	5	More than half the days	Several days	Not at all	More than half the days	Not at all	Not at all	Not at all	Not at all	Not at all	Applied to me to a considerable degree or a good part of time	Applied to me to a considerable degree or a good part of time	Applied to me very much or most of the time	Applied to me to some degree, or some of the time	Applied to me to some degree, or some of the time	Applied to me to a considerable degree or a good part of time	Applied to me to some degree, or some of the time	Applied to me to a considerable degree or a good part of time	Applied to me to some degree, or some of the time	Did not apply to me at all	Applied to me to a considerable degree or a good part of time	Applied to me to a considerable degree or a good part of time	Applied to me to a considerable degree or a good part of time	Applied to me to a considerable degree or a good part of time	Applied to me to some degree, or some of the time	Applied to me to some degree, or some of the time	Did not apply to me at all	Applied to me to a considerable degree or a good part of time	Applied to me to some degree, or some of the time	Did not apply to me at all	Applied to me to some degree, or some of the time
22	Female	Medical	5	Non-smoker	None	3	6	Several days	Several days	Several days	Several days	Several days	Not at all	Several days	Several days	Not at all	Did not apply to me at all	Did not apply to me at all	Did not apply to me at all	Did not apply to me at all	Did not apply to me at all	Did not apply to me at all	Did not apply to me at all	Did not apply to me at all	Did not apply to me at all	Did not apply to me at all	Did not apply to me at all	Did not apply to me at all	Did not apply to me at all	Did not apply to me at all	Did not apply to me at all	Did not apply to me at all	Did not apply to me at all	Did not apply to me at all	Did not apply to me at all	Did not apply to me at all	Did not apply to me at all
23	Female	Medical	4	Non-smoker	None	7	10	Several days	Several days	Nearly every day	Several days	Not at all	Several days	Not at all	Several days	Not at all	Applied to me to some degree, or some of the time	Did not apply to me at all	Did not apply to me at all	Did not apply to me at all	Applied to me to a considerable degree or a good part of time	Applied to me to some degree, or some of the time	Did not apply to me at all	Applied to me to a considerable degree or a good part of time	Applied to me to a considerable degree or a good part of time	Did not apply to me at all	Applied to me to a considerable degree or a good part of time	Applied to me to a considerable degree or a good part of time	Applied to me to a considerable degree or a good part of time	Applied to me to a considerable degree or a good part of time	Did not apply to me at all	Applied to me to a considerable degree or a good part of time	Applied to me very much or most of the time	Applied to me very much or most of the time	Did not apply to me at all	Did not apply to me at all	Did not apply to me at all
17	Male	Non-medical	1	Non-smoker	Regular	5	5	Several days	Several days	Several days	Several days	Several days	Several days	More than half the days	Several days	Several days	Applied to me to a considerable degree or a good part of time	Did not apply to me at all	Applied to me to some degree, or some of the time	Applied to me very much or most of the time	Applied to me to some degree, or some of the time	Applied to me to a considerable degree or a good part of time	Applied to me very much or most of the time	Applied to me to a considerable degree or a good part of time	Did not apply to me at all	Applied to me to a considerable degree or a good part of time	Applied to me to a considerable degree or a good part of time	Applied to me to some degree, or some of the time	Applied to me to a considerable degree or a good part of time	Applied to me to some degree, or some of the time	Applied to me to some degree, or some of the time	Applied to me to some degree, or some of the time	Applied to me very much or most of the time	Applied to me to some degree, or some of the time	Applied to me to a considerable degree or a good part of time	Applied to me very much or most of the time	Applied to me to some degree, or some of the time
19	Female	Medical	1	Non-smoker	None	1	1	Several days	More than half the days	Several days	Nearly every day	Several days	More than half the days	Not at all	Several days	More than half the days	Applied to me to some degree, or some of the time	Applied to me to a considerable degree or a good part of time	Applied to me to some degree, or some of the time	Did not apply to me at all	Applied to me to a considerable degree or a good part of time	Applied to me very much or most of the time	Did not apply to me at all	Applied to me to some degree, or some of the time	Applied to me to a considerable degree or a good part of time	Applied to me very much or most of the time	Did not apply to me at all	Did not apply to me at all	Applied to me to a considerable degree or a good part of time	Applied to me to some degree, or some of the time	Applied to me very much or most of the time	Applied to me very much or most of the time	Applied to me to a considerable degree or a good part of time	Did not apply to me at all	Did not apply to me at all	Applied to me to some degree, or some of the time	Applied to me to a considerable degree or a good part of time
25	Female	Medical	2	Non-smoker	None	6	6	Several days	Several days	Several days	Several days	More than half the days	More than half the days	Several days	Several days	Not at all	Did not apply to me at all	Applied to me to some degree, or some of the time	Applied to me to some degree, or some of the time	Applied to me to some degree, or some of the time	Applied to me to some degree, or some of the time	Applied to me to a considerable degree or a good part of time	Applied to me to some degree, or some of the time	Applied to me to some degree, or some of the time	Applied to me to a considerable degree or a good part of time	Applied to me to some degree, or some of the time	Applied to me to some degree, or some of the time	Applied to me to some degree, or some of the time	Applied to me to some degree, or some of the time	Applied to me to some degree, or some of the time	Applied to me to some degree, or some of the time	Applied to me to some degree, or some of the time	Applied to me to some degree, or some of the time	Applied to me to a considerable degree or a good part of time	Applied to me to some degree, or some of the time	Applied to me to a considerable degree or a good part of time	Applied to me to some degree, or some of the time
23	Male	Medical	4	Non-smoker	None	1	1	Not at all	Not at all	Not at all	Not at all	Not at all	Not at all	Not at all	Not at all	Not at all	Did not apply to me at all	Did not apply to me at all	Did not apply to me at all	Did not apply to me at all	Did not apply to me at all	Did not apply to me at all	Did not apply to me at all	Did not apply to me at all	Did not apply to me at all	Did not apply to me at all	Did not apply to me at all	Did not apply to me at all	Did not apply to me at all	Did not apply to me at all	Did not apply to me at all	Did not apply to me at all	Did not apply to me at all	Did not apply to me at all	Did not apply to me at all	Did not apply to me at all	Did not apply to me at all
21	Male	Medical	4	Non-smoker	None	6	6	More than half the days	Several days	Several days	Several days	Several days	Several days	Several days	More than half the days	Several days	Applied to me to some degree, or some of the time	Applied to me to a considerable degree or a good part of time	Applied to me to a considerable degree or a good part of time	Applied to me to some degree, or some of the time	Applied to me very much or most of the time	Applied to me to some degree, or some of the time	Applied to me to a considerable degree or a good part of time	Applied to me to some degree, or some of the time	Applied to me very much or most of the time	Applied to me to some degree, or some of the time	Applied to me to a considerable degree or a good part of time	Applied to me very much or most of the time	Applied to me to a considerable degree or a good part of time	Applied to me very much or most of the time	Applied to me very much or most of the time	Applied to me to some degree, or some of the time	Applied to me very much or most of the time	Applied to me to some degree, or some of the time	Applied to me very much or most of the time	Applied to me to a considerable degree or a good part of time	Applied to me to a considerable degree or a good part of time
24	Male	Non-medical	5	Current smoker	None	8	5	Nearly every day	Several days	Several days	Several days	Several days	Several days	Not at all	Not at all	Not at all	Did not apply to me at all	Did not apply to me at all	Applied to me very much or most of the time	Did not apply to me at all	Applied to me to a considerable degree or a good part of time	Applied to me very much or most of the time	Applied to me very much or most of the time	Applied to me very much or most of the time	Applied to me very much or most of the time	Applied to me very much or most of the time	Applied to me very much or most of the time	Applied to me to a considerable degree or a good part of time	Applied to me to some degree, or some of the time	Applied to me to a considerable degree or a good part of time	Applied to me very much or most of the time	Applied to me very much or most of the time	Applied to me very much or most of the time	Applied to me very much or most of the time	Applied to me very much or most of the time	Applied to me very much or most of the time	Did not apply to me at all
23	Male	Medical	4	Non-smoker	None	1	7	Not at all	Not at all	Not at all	Not at all	Not at all	Not at all	Not at all	Not at all	Not at all	Did not apply to me at all	Did not apply to me at all	Did not apply to me at all	Did not apply to me at all	Did not apply to me at all	Did not apply to me at all	Did not apply to me at all	Did not apply to me at all	Did not apply to me at all	Did not apply to me at all	Did not apply to me at all	Did not apply to me at all	Did not apply to me at all	Did not apply to me at all	Did not apply to me at all	Did not apply to me at all	Did not apply to me at all	Did not apply to me at all	Did not apply to me at all	Did not apply to me at all	Did not apply to me at all
18	Male	Non-medical	1	Non-smoker	None	6	9	Not at all	Several days	More than half the days	More than half the days	More than half the days	More than half the days	Several days	More than half the days	More than half the days	Applied to me to some degree, or some of the time	Applied to me to a considerable degree or a good part of time	Applied to me to some degree, or some of the time	Applied to me to a considerable degree or a good part of time	Applied to me to some degree, or some of the time	Applied to me very much or most of the time	Did not apply to me at all	Applied to me very much or most of the time	Applied to me to some degree, or some of the time	Applied to me to a considerable degree or a good part of time	Applied to me to a considerable degree or a good part of time	Applied to me to some degree, or some of the time	Applied to me very much or most of the time	Did not apply to me at all	Applied to me to a considerable degree or a good part of time	Applied to me to some degree, or some of the time	Applied to me to a considerable degree or a good part of time	Did not apply to me at all	Applied to me very much or most of the time	Applied to me very much or most of the time	Applied to me very much or most of the time
22	Male	Medical	4	Non-smoker	None	1	10	Not at all	Not at all	Not at all	Not at all	Not at all	Not at all	Not at all	Not at all	Not at all	Did not apply to me at all	Did not apply to me at all	Did not apply to me at all	Applied to me to some degree, or some of the time	Applied to me to some degree, or some of the time	Did not apply to me at all	Did not apply to me at all	Did not apply to me at all	Did not apply to me at all	Did not apply to me at all	Did not apply to me at all	Did not apply to me at all	Did not apply to me at all	Did not apply to me at all	Did not apply to me at all	Did not apply to me at all	Did not apply to me at all	Did not apply to me at all	Did not apply to me at all	Did not apply to me at all	Did not apply to me at all
17	Female	Non-medical	1	Non-smoker	None	8	7	Several days	Several days	Not at all	Several days	Nearly every day	Several days	Several days	Several days	Not at all	Did not apply to me at all	Applied to me to some degree, or some of the time	Applied to me to some degree, or some of the time	Applied to me to some degree, or some of the time	Did not apply to me at all	Did not apply to me at all	Applied to me very much or most of the time	Applied to me to a considerable degree or a good part of time	Applied to me to some degree, or some of the time	Did not apply to me at all	Applied to me to a considerable degree or a good part of time	Did not apply to me at all	Applied to me very much or most of the time	Did not apply to me at all	Applied to me to some degree, or some of the time	Applied to me to some degree, or some of the time	Applied to me to some degree, or some of the time	Applied to me very much or most of the time	Applied to me to some degree, or some of the time	Applied to me to some degree, or some of the time	Did not apply to me at all
18	Male	Non-medical	2	Non-smoker	None	1	8	More than half the days	Not at all	Not at all	Not at all	Nearly every day	Nearly every day	Not at all	Not at all	Not at all	Did not apply to me at all	Did not apply to me at all	Applied to me to some degree, or some of the time	Did not apply to me at all	Applied to me to a considerable degree or a good part of time	Applied to me to some degree, or some of the time	Did not apply to me at all	Did not apply to me at all	Applied to me to some degree, or some of the time	Applied to me to a considerable degree or a good part of time	Applied to me to a considerable degree or a good part of time	Did not apply to me at all	Did not apply to me at all	Applied to me to some degree, or some of the time	Applied to me to some degree, or some of the time	Applied to me to some degree, or some of the time	Applied to me to some degree, or some of the time	Applied to me to a considerable degree or a good part of time	Did not apply to me at all	Applied to me to a considerable degree or a good part of time	Applied to me to a considerable degree or a good part of time
22	Male	Medical	4	Non-smoker	None	8	8	Several days	Several days	Not at all	More than half the days	Not at all	More than half the days	More than half the days	More than half the days	Not at all	Did not apply to me at all	Did not apply to me at all	Did not apply to me at all	Did not apply to me at all	Did not apply to me at all	Applied to me to some degree, or some of the time	Did not apply to me at all	Applied to me to a considerable degree or a good part of time	Did not apply to me at all	Did not apply to me at all	Applied to me to some degree, or some of the time	Applied to me to a considerable degree or a good part of time	Applied to me to some degree, or some of the time	Applied to me to some degree, or some of the time	Applied to me to a considerable degree or a good part of time	Applied to me to some degree, or some of the time	Did not apply to me at all	Applied to me to a considerable degree or a good part of time	Did not apply to me at all	Did not apply to me at all	Did not apply to me at all
22	Male	Medical	3	Non-smoker	None	8	6	Several days	Several days	Several days	Several days	Several days	Several days	Several days	Not at all	Not at all	Did not apply to me at all	Did not apply to me at all	Did not apply to me at all	Did not apply to me at all	Applied to me to some degree, or some of the time	Applied to me to some degree, or some of the time	Did not apply to me at all	Did not apply to me at all	Did not apply to me at all	Did not apply to me at all	Did not apply to me at all	Did not apply to me at all	Applied to me to some degree, or some of the time	Applied to me to some degree, or some of the time	Did not apply to me at all	Applied to me to some degree, or some of the time	Did not apply to me at all	Did not apply to me at all	Did not apply to me at all	Did not apply to me at all	Did not apply to me at all
22	Male	Medical	4	Non-smoker	None	4	6	Not at all	Not at all	Not at all	Not at all	Not at all	Not at all	Not at all	Not at all	Not at all	Applied to me to some degree, or some of the time	Applied to me very much or most of the time	Applied to me to a considerable degree or a good part of time	Applied to me to some degree, or some of the time	Did not apply to me at all	Did not apply to me at all	Did not apply to me at all	Did not apply to me at all	Did not apply to me at all	Did not apply to me at all	Did not apply to me at all	Did not apply to me at all	Did not apply to me at all	Did not apply to me at all	Did not apply to me at all	Did not apply to me at all	Did not apply to me at all	Did not apply to me at all	Did not apply to me at all	Did not apply to me at all	Did not apply to me at all
22	Male	Medical	4	Non-smoker	None	1	7	Not at all	Several days	Nearly every day	Several days	Several days	Not at all	Several days	Not at all	Several days	Did not apply to me at all	Did not apply to me at all	Did not apply to me at all	Applied to me to a considerable degree or a good part of time	Applied to me to some degree, or some of the time	Applied to me to some degree, or some of the time	Applied to me to some degree, or some of the time	Did not apply to me at all	Applied to me to some degree, or some of the time	Applied to me to some degree, or some of the time	Applied to me very much or most of the time	Applied to me to a considerable degree or a good part of time	Applied to me to some degree, or some of the time	Applied to me to some degree, or some of the time	Did not apply to me at all	Applied to me to some degree, or some of the time	Applied to me to some degree, or some of the time	Applied to me to a considerable degree or a good part of time	Applied to me to some degree, or some of the time	Applied to me to some degree, or some of the time	Did not apply to me at all
22	Male	Medical	4	Former smoker	None	7	4	Not at all	Several days	Several days	Not at all	Not at all	Not at all	Not at all	Not at all	Not at all	Did not apply to me at all	Did not apply to me at all	Did not apply to me at all	Applied to me to some degree, or some of the time	Applied to me very much or most of the time	Applied to me to some degree, or some of the time	Applied to me to some degree, or some of the time	Applied to me to a considerable degree or a good part of time	Did not apply to me at all	Applied to me to some degree, or some of the time	Applied to me to a considerable degree or a good part of time	Applied to me to some degree, or some of the time	Applied to me to some degree, or some of the time	Applied to me to some degree, or some of the time	Did not apply to me at all	Did not apply to me at all	Did not apply to me at all	Applied to me to a considerable degree or a good part of time	Applied to me very much or most of the time	Did not apply to me at all	Did not apply to me at all
24	Female	Medical	5	Non-smoker	None	6	5	More than half the days	Several days	Not at all	Several days	Not at all	More than half the days	Not at all	Not at all	Not at all	Did not apply to me at all	Applied to me to a considerable degree or a good part of time	Applied to me to some degree, or some of the time	Did not apply to me at all	Applied to me to some degree, or some of the time	Applied to me to a considerable degree or a good part of time	Did not apply to me at all	Applied to me to some degree, or some of the time	Applied to me to some degree, or some of the time	Applied to me to some degree, or some of the time	Did not apply to me at all	Did not apply to me at all	Applied to me to some degree, or some of the time	Applied to me to some degree, or some of the time	Did not apply to me at all	Applied to me to some degree, or some of the time	Applied to me to some degree, or some of the time	Applied to me to some degree, or some of the time	Did not apply to me at all	Did not apply to me at all	Did not apply to me at all
22	Male	Medical	4	Non-smoker	None	3	4	Several days	Several days	Several days	Several days	Several days	Not at all	Several days	Not at all	Not at all	Applied to me to some degree, or some of the time	Applied to me to some degree, or some of the time	Applied to me to some degree, or some of the time	Did not apply to me at all	Applied to me to some degree, or some of the time	Applied to me to some degree, or some of the time	Applied to me to some degree, or some of the time	Applied to me to some degree, or some of the time	Applied to me to some degree, or some of the time	Did not apply to me at all	Applied to me to some degree, or some of the time	Applied to me to some degree, or some of the time	Applied to me to some degree, or some of the time	Applied to me to some degree, or some of the time	Applied to me to some degree, or some of the time	Applied to me to some degree, or some of the time	Did not apply to me at all	Did not apply to me at all	Did not apply to me at all	Did not apply to me at all	Did not apply to me at all
21	Male	Medical	4	Non-smoker	None	6	7	More than half the days	Not at all	Several days	Not at all	Several days	Not at all	Several days	Not at all	Not at all	Did not apply to me at all	Did not apply to me at all	Applied to me to some degree, or some of the time	Applied to me to some degree, or some of the time	Applied to me very much or most of the time	Applied to me to some degree, or some of the time	Did not apply to me at all	Applied to me to some degree, or some of the time	Applied to me to some degree, or some of the time	Applied to me to some degree, or some of the time	Applied to me to some degree, or some of the time	Applied to me to some degree, or some of the time	Applied to me to some degree, or some of the time	Did not apply to me at all	Applied to me to some degree, or some of the time	Did not apply to me at all	Did not apply to me at all	Applied to me to some degree, or some of the time	Applied to me to some degree, or some of the time	Did not apply to me at all	Did not apply to me at all
21	Female	Medical	4	Former smoker	None	7	5	More than half the days	More than half the days	Nearly every day	Nearly every day	More than half the days	Several days	Several days	Several days	More than half the days	Applied to me to some degree, or some of the time	Applied to me to some degree, or some of the time	Applied to me to some degree, or some of the time	Applied to me to some degree, or some of the time	Applied to me to a considerable degree or a good part of time	Applied to me very much or most of the time	Applied to me to some degree, or some of the time	Applied to me to some degree, or some of the time	Applied to me to some degree, or some of the time	Applied to me to some degree, or some of the time	Applied to me to a considerable degree or a good part of time	Applied to me to a considerable degree or a good part of time	Applied to me to some degree, or some of the time	Applied to me to a considerable degree or a good part of time	Applied to me to a considerable degree or a good part of time	Applied to me to a considerable degree or a good part of time	Applied to me to some degree, or some of the time	Applied to me very much or most of the time	Applied to me to a considerable degree or a good part of time	Applied to me to a considerable degree or a good part of time	Applied to me to some degree, or some of the time
22	Male	Medical	4	Non-smoker	None	7	6	Several days	Several days	Several days	Several days	Several days	Nearly every day	Not at all	Not at all	Nearly every day	Applied to me to some degree, or some of the time	Applied to me to a considerable degree or a good part of time	Did not apply to me at all	Did not apply to me at all	Applied to me to some degree, or some of the time	Applied to me to some degree, or some of the time	Did not apply to me at all	Applied to me to some degree, or some of the time	Did not apply to me at all	Did not apply to me at all	Applied to me to some degree, or some of the time	Applied to me to some degree, or some of the time	Applied to me to some degree, or some of the time	Applied to me to some degree, or some of the time	Did not apply to me at all	Applied to me to some degree, or some of the time	Applied to me to some degree, or some of the time	Did not apply to me at all	Applied to me to a considerable degree or a good part of time	Applied to me to some degree, or some of the time	Applied to me to some degree, or some of the time
24	Male	Medical	4	Former smoker	None	3	5	More than half the days	Several days	Not at all	Several days	Not at all	Not at all	Not at all	Not at all	Several days	Did not apply to me at all	Applied to me to some degree, or some of the time	Did not apply to me at all	Did not apply to me at all	Did not apply to me at all	Did not apply to me at all	Did not apply to me at all	Applied to me to some degree, or some of the time	Applied to me to some degree, or some of the time	Applied to me to some degree, or some of the time	Did not apply to me at all	Did not apply to me at all	Did not apply to me at all	Did not apply to me at all	Did not apply to me at all	Applied to me to some degree, or some of the time	Did not apply to me at all	Applied to me to some degree, or some of the time	Applied to me to some degree, or some of the time	Did not apply to me at all	Applied to me to some degree, or some of the time
22	Female	Medical	4	Non-smoker	None	10	7	Nearly every day	Nearly every day	Nearly every day	Nearly every day	Nearly every day	Nearly every day	More than half the days	Nearly every day	Nearly every day	Applied to me to a considerable degree or a good part of time	Applied to me to a considerable degree or a good part of time	Applied to me very much or most of the time	Applied to me very much or most of the time	Applied to me very much or most of the time	Applied to me to a considerable degree or a good part of time	Applied to me very much or most of the time	Applied to me very much or most of the time	Applied to me very much or most of the time	Applied to me very much or most of the time	Applied to me very much or most of the time	Applied to me very much or most of the time	Applied to me very much or most of the time	Applied to me very much or most of the time	Applied to me very much or most of the time	Applied to me very much or most of the time	Applied to me to a considerable degree or a good part of time	Applied to me very much or most of the time	Applied to me very much or most of the time	Applied to me to a considerable degree or a good part of time	Applied to me very much or most of the time
23	Male	Non-medical	4	Non-smoker	None	7	6	Not at all	More than half the days	Several days	Nearly every day	Not at all	Nearly every day	Nearly every day	Several days	Nearly every day	Applied to me to a considerable degree or a good part of time	Applied to me to some degree, or some of the time	Applied to me very much or most of the time	Applied to me to a considerable degree or a good part of time	Applied to me very much or most of the time	Applied to me very much or most of the time	Did not apply to me at all	Applied to me to a considerable degree or a good part of time	Applied to me very much or most of the time	Applied to me very much or most of the time	Applied to me to a considerable degree or a good part of time	Applied to me to a considerable degree or a good part of time	Applied to me very much or most of the time	Applied to me to some degree, or some of the time	Applied to me to a considerable degree or a good part of time	Applied to me very much or most of the time	Applied to me to a considerable degree or a good part of time	Applied to me very much or most of the time	Applied to me to some degree, or some of the time	Applied to me to a considerable degree or a good part of time	Applied to me to a considerable degree or a good part of time
25	Male	Medical	4	Non-smoker	None	7	5	Not at all	Several days	Several days	Several days	Several days	Several days	Several days	Several days	Several days	Applied to me to some degree, or some of the time	Did not apply to me at all	Applied to me to some degree, or some of the time	Applied to me to some degree, or some of the time	Applied to me to some degree, or some of the time	Applied to me to some degree, or some of the time	Applied to me to some degree, or some of the time	Did not apply to me at all	Applied to me to some degree, or some of the time	Applied to me to some degree, or some of the time	Applied to me to some degree, or some of the time	Applied to me to some degree, or some of the time	Applied to me to some degree, or some of the time	Applied to me to some degree, or some of the time	Did not apply to me at all	Did not apply to me at all	Did not apply to me at all	Did not apply to me at all	Did not apply to me at all	Applied to me to some degree, or some of the time	Did not apply to me at all
22	Male	Medical	4	Non-smoker	None	7	4	Several days	Several days	More than half the days	Several days	More than half the days	Nearly every day	Nearly every day	Several days	Several days	Applied to me to some degree, or some of the time	Applied to me to some degree, or some of the time	Applied to me to a considerable degree or a good part of time	Did not apply to me at all	Applied to me very much or most of the time	Did not apply to me at all	Applied to me to some degree, or some of the time	Applied to me to some degree, or some of the time	Applied to me to some degree, or some of the time	Applied to me to a considerable degree or a good part of time	Applied to me to a considerable degree or a good part of time	Applied to me to a considerable degree or a good part of time	Applied to me to a considerable degree or a good part of time	Applied to me to a considerable degree or a good part of time	Did not apply to me at all	Applied to me to a considerable degree or a good part of time	Applied to me to some degree, or some of the time	Applied to me to a considerable degree or a good part of time	Applied to me to some degree, or some of the time	Did not apply to me at all	Applied to me to a considerable degree or a good part of time
24	Male	Non-medical	4	Non-smoker	None	5	5	More than half the days	Several days	More than half the days	Not at all	Not at all	More than half the days	Several days	More than half the days	Several days	Applied to me to a considerable degree or a good part of time	Applied to me to some degree, or some of the time	Applied to me very much or most of the time	Applied to me to a considerable degree or a good part of time	Applied to me to some degree, or some of the time	Applied to me to some degree, or some of the time	Applied to me to a considerable degree or a good part of time	Applied to me very much or most of the time	Applied to me to some degree, or some of the time	Applied to me to a considerable degree or a good part of time	Applied to me to a considerable degree or a good part of time	Applied to me to some degree, or some of the time	Applied to me to some degree, or some of the time	Applied to me to a considerable degree or a good part of time	Applied to me very much or most of the time	Applied to me to a considerable degree or a good part of time	Applied to me to some degree, or some of the time	Applied to me to a considerable degree or a good part of time	Applied to me to a considerable degree or a good part of time	Applied to me to a considerable degree or a good part of time	Applied to me to some degree, or some of the time
22	Male	Medical	4	Non-smoker	None	10	6	Nearly every day	Nearly every day	Several days	Several days	Nearly every day	Nearly every day	More than half the days	Not at all	Nearly every day	Applied to me to a considerable degree or a good part of time	Applied to me to a considerable degree or a good part of time	Applied to me to some degree, or some of the time	Did not apply to me at all	Did not apply to me at all	Applied to me very much or most of the time	Applied to me to some degree, or some of the time	Did not apply to me at all	Applied to me to a considerable degree or a good part of time	Applied to me very much or most of the time	Applied to me very much or most of the time	Applied to me very much or most of the time	Did not apply to me at all	Did not apply to me at all	Did not apply to me at all	Did not apply to me at all	Applied to me to a considerable degree or a good part of time	Applied to me very much or most of the time	Did not apply to me at all	Did not apply to me at all	Applied to me very much or most of the time
25	Male	Medical	4	Non-smoker	None	3	8	More than half the days	Several days	Several days	Several days	More than half the days	More than half the days	Not at all	Not at all	More than half the days	Did not apply to me at all	Did not apply to me at all	Did not apply to me at all	Did not apply to me at all	Applied to me to some degree, or some of the time	Applied to me to some degree, or some of the time	Did not apply to me at all	Did not apply to me at all	Did not apply to me at all	Applied to me to some degree, or some of the time	Applied to me to some degree, or some of the time	Did not apply to me at all	Applied to me to some degree, or some of the time	Did not apply to me at all	Did not apply to me at all	Applied to me to some degree, or some of the time	Did not apply to me at all	Did not apply to me at all	Did not apply to me at all	Did not apply to me at all	Did not apply to me at all
22	Male	Non-medical	5	Non-smoker	None	4	7	Several days	Several days	Several days	Several days	Several days	Several days	Several days	Several days	Several days	Applied to me to some degree, or some of the time	Applied to me to some degree, or some of the time	Applied to me to some degree, or some of the time	Applied to me to some degree, or some of the time	Applied to me to some degree, or some of the time	Applied to me to some degree, or some of the time	Applied to me to some degree, or some of the time	Applied to me to some degree, or some of the time	Applied to me to some degree, or some of the time	Applied to me to some degree, or some of the time	Applied to me to some degree, or some of the time	Applied to me to some degree, or some of the time	Applied to me to some degree, or some of the time	Applied to me to some degree, or some of the time	Applied to me to some degree, or some of the time	Applied to me to some degree, or some of the time	Applied to me to some degree, or some of the time	Applied to me to some degree, or some of the time	Applied to me to some degree, or some of the time	Applied to me to some degree, or some of the time	Applied to me to some degree, or some of the time
21	Male	Medical	4	Non-smoker	None	1	1	Not at all	Not at all	Not at all	Not at all	Not at all	Not at all	Not at all	Not at all	Not at all	Did not apply to me at all	Did not apply to me at all	Did not apply to me at all	Did not apply to me at all	Did not apply to me at all	Did not apply to me at all	Did not apply to me at all	Did not apply to me at all	Did not apply to me at all	Did not apply to me at all	Did not apply to me at all	Did not apply to me at all	Did not apply to me at all	Did not apply to me at all	Did not apply to me at all	Did not apply to me at all	Did not apply to me at all	Did not apply to me at all	Did not apply to me at all	Did not apply to me at all	Did not apply to me at all
22	Female	Medical	4	Non-smoker	None	5	5	Several days	Several days	Several days	Several days	Several days	Several days	Several days	Several days	Several days	Applied to me to some degree, or some of the time	Applied to me to some degree, or some of the time	Applied to me to some degree, or some of the time	Applied to me to some degree, or some of the time	Applied to me to some degree, or some of the time	Applied to me to some degree, or some of the time	Applied to me to some degree, or some of the time	Applied to me to some degree, or some of the time	Applied to me to some degree, or some of the time	Applied to me to some degree, or some of the time	Applied to me to some degree, or some of the time	Applied to me to some degree, or some of the time	Applied to me to some degree, or some of the time	Applied to me to some degree, or some of the time	Applied to me to some degree, or some of the time	Applied to me to some degree, or some of the time	Applied to me to some degree, or some of the time	Applied to me to some degree, or some of the time	Applied to me to some degree, or some of the time	Applied to me to some degree, or some of the time	Applied to me to some degree, or some of the time
21	Female	Medical	4	Non-smoker	None	4	9	Several days	Not at all	More than half the days	Several days	Several days	Several days	Not at all	Not at all	Not at all	Did not apply to me at all	Did not apply to me at all	Did not apply to me at all	Did not apply to me at all	Applied to me to some degree, or some of the time	Applied to me to some degree, or some of the time	Did not apply to me at all	Did not apply to me at all	Applied to me to some degree, or some of the time	Did not apply to me at all	Did not apply to me at all	Did not apply to me at all	Did not apply to me at all	Did not apply to me at all	Did not apply to me at all	Applied to me to some degree, or some of the time	Applied to me to some degree, or some of the time	Applied to me to some degree, or some of the time	Did not apply to me at all	Did not apply to me at all	Did not apply to me at all
23	Male	Medical	4	Non-smoker	None	2	9	Not at all	Not at all	Not at all	Several days	Not at all	Not at all	Not at all	Not at all	Not at all	Did not apply to me at all	Did not apply to me at all	Did not apply to me at all	Applied to me to some degree, or some of the time	Did not apply to me at all	Did not apply to me at all	Did not apply to me at all	Did not apply to me at all	Did not apply to me at all	Did not apply to me at all	Did not apply to me at all	Did not apply to me at all	Did not apply to me at all	Did not apply to me at all	Did not apply to me at all	Did not apply to me at all	Did not apply to me at all	Did not apply to me at all	Did not apply to me at all	Did not apply to me at all	Did not apply to me at all
22	Male	Non-medical	4	Non-smoker	None	2	6	Several days	Not at all	Several days	Not at all	Not at all	Several days	Not at all	Not at all	Not at all	Did not apply to me at all	Did not apply to me at all	Did not apply to me at all	Did not apply to me at all	Did not apply to me at all	Did not apply to me at all	Did not apply to me at all	Did not apply to me at all	Did not apply to me at all	Did not apply to me at all	Did not apply to me at all	Did not apply to me at all	Did not apply to me at all	Did not apply to me at all	Did not apply to me at all	Did not apply to me at all	Did not apply to me at all	Did not apply to me at all	Did not apply to me at all	Did not apply to me at all	Did not apply to me at all
23	Female	Non-medical	4	Non-smoker	None	5	6	Several days	Several days	Several days	Several days	More than half the days	Several days	More than half the days	Several days	Not at all	Did not apply to me at all	Did not apply to me at all	Did not apply to me at all	Did not apply to me at all	Did not apply to me at all	Applied to me to some degree, or some of the time	Did not apply to me at all	Applied to me to some degree, or some of the time	Applied to me to some degree, or some of the time	Did not apply to me at all	Applied to me to some degree, or some of the time	Applied to me to some degree, or some of the time	Applied to me to some degree, or some of the time	Did not apply to me at all	Did not apply to me at all	Did not apply to me at all	Applied to me to some degree, or some of the time	Applied to me to some degree, or some of the time	Applied to me to some degree, or some of the time	Did not apply to me at all	Did not apply to me at all
28	Male	Non-medical	5	Non-smoker	None	9	8	Several days	More than half the days	Several days	Several days	More than half the days	Nearly every day	Nearly every day	More than half the days	Nearly every day	Applied to me to some degree, or some of the time	Applied to me to some degree, or some of the time	Applied to me to a considerable degree or a good part of time	Applied to me to a considerable degree or a good part of time	Applied to me to some degree, or some of the time	Did not apply to me at all	Applied to me to some degree, or some of the time	Applied to me to some degree, or some of the time	Applied to me to some degree, or some of the time	Applied to me to some degree, or some of the time	Applied to me to a considerable degree or a good part of time	Applied to me very much or most of the time	Applied to me very much or most of the time	Applied to me to a considerable degree or a good part of time	Did not apply to me at all	Applied to me to a considerable degree or a good part of time	Applied to me very much or most of the time	Applied to me to a considerable degree or a good part of time	Applied to me to a considerable degree or a good part of time	Applied to me very much or most of the time	Applied to me very much or most of the time
21	Female	Non-medical	3	Non-smoker	None	10	7	Several days	Several days	More than half the days	Several days	Several days	Several days	Several days	Several days	Several days	Applied to me to some degree, or some of the time	Did not apply to me at all	Applied to me to a considerable degree or a good part of time	Did not apply to me at all	Applied to me to some degree, or some of the time	Applied to me very much or most of the time	Applied to me to a considerable degree or a good part of time	Applied to me to a considerable degree or a good part of time	Applied to me to some degree, or some of the time	Did not apply to me at all	Applied to me to some degree, or some of the time	Applied to me to a considerable degree or a good part of time	Applied to me to a considerable degree or a good part of time	Applied to me to some degree, or some of the time	Applied to me to some degree, or some of the time	Applied to me to some degree, or some of the time	Applied to me to a considerable degree or a good part of time	Applied to me to a considerable degree or a good part of time	Applied to me to a considerable degree or a good part of time	Applied to me to a considerable degree or a good part of time	Applied to me to a considerable degree or a good part of time
23	Male	Non-medical	4	Non-smoker	None	4	8	Several days	Not at all	More than half the days	Several days	Not at all	Several days	Not at all	Several days	Nearly every day	Did not apply to me at all	Applied to me to some degree, or some of the time	Did not apply to me at all	Applied to me to a considerable degree or a good part of time	Applied to me to some degree, or some of the time	Applied to me very much or most of the time	Applied to me to a considerable degree or a good part of time	Applied to me to a considerable degree or a good part of time	Applied to me to a considerable degree or a good part of time	Did not apply to me at all	Did not apply to me at all	Did not apply to me at all	Did not apply to me at all	Did not apply to me at all	Did not apply to me at all	Applied to me to some degree, or some of the time	Did not apply to me at all	Applied to me to some degree, or some of the time	Applied to me to some degree, or some of the time	Did not apply to me at all	Applied to me very much or most of the time
25	Male	Non-medical	5	Non-smoker	None	7	6	Nearly every day	Several days	Nearly every day	More than half the days	More than half the days	Not at all	Not at all	Not at all	Not at all	Applied to me to some degree, or some of the time	Applied to me to some degree, or some of the time	Applied to me to some degree, or some of the time	Applied to me to a considerable degree or a good part of time	Applied to me to some degree, or some of the time	Applied to me to a considerable degree or a good part of time	Applied to me to some degree, or some of the time	Applied to me to some degree, or some of the time	Applied to me to some degree, or some of the time	Applied to me to some degree, or some of the time	Did not apply to me at all	Did not apply to me at all	Applied to me to some degree, or some of the time	Applied to me to some degree, or some of the time	Applied to me to some degree, or some of the time	Applied to me to some degree, or some of the time	Applied to me to some degree, or some of the time	Applied to me to some degree, or some of the time	Applied to me to some degree, or some of the time	Did not apply to me at all	Did not apply to me at all
24	Male	Non-medical	5	Non-smoker	None	7	8	Nearly every day	More than half the days	Several days	Nearly every day	Several days	Several days	Several days	Not at all	Not at all	Applied to me to some degree, or some of the time	Applied to me to some degree, or some of the time	Applied to me to some degree, or some of the time	Did not apply to me at all	Applied to me to some degree, or some of the time	Applied to me to a considerable degree or a good part of time	Did not apply to me at all	Applied to me to some degree, or some of the time	Applied to me to some degree, or some of the time	Applied to me to some degree, or some of the time	Applied to me to some degree, or some of the time	Applied to me to some degree, or some of the time	Applied to me to some degree, or some of the time	Applied to me to some degree, or some of the time	Did not apply to me at all	Applied to me to some degree, or some of the time	Applied to me to some degree, or some of the time	Applied to me to some degree, or some of the time	Applied to me to some degree, or some of the time	Applied to me to some degree, or some of the time	Applied to me to some degree, or some of the time
25	Male	Non-medical	4	Non-smoker	None	3	5	Several days	Several days	Nearly every day	Several days	More than half the days	Several days	Nearly every day	More than half the days	Not at all	Applied to me to some degree, or some of the time	Did not apply to me at all	Did not apply to me at all	Did not apply to me at all	Applied to me to some degree, or some of the time	Did not apply to me at all	Did not apply to me at all	Applied to me to some degree, or some of the time	Did not apply to me at all	Applied to me to a considerable degree or a good part of time	Did not apply to me at all	Did not apply to me at all	Did not apply to me at all	Did not apply to me at all	Did not apply to me at all	Applied to me to some degree, or some of the time	Applied to me to a considerable degree or a good part of time	Did not apply to me at all	Did not apply to me at all	Did not apply to me at all	Applied to me to some degree, or some of the time
23	Female	Medical	4	Non-smoker	None	10	7	Several days	Nearly every day	Nearly every day	Nearly every day	Nearly every day	Nearly every day	Nearly every day	Nearly every day	Nearly every day	Applied to me to some degree, or some of the time	Applied to me very much or most of the time	Applied to me to some degree, or some of the time	Applied to me very much or most of the time	Applied to me very much or most of the time	Applied to me very much or most of the time	Applied to me very much or most of the time	Applied to me very much or most of the time	Applied to me very much or most of the time	Applied to me very much or most of the time	Applied to me very much or most of the time	Applied to me to a considerable degree or a good part of time	Applied to me very much or most of the time	Applied to me very much or most of the time	Applied to me very much or most of the time	Applied to me very much or most of the time	Applied to me very much or most of the time	Applied to me to a considerable degree or a good part of time	Applied to me very much or most of the time	Applied to me very much or most of the time	Applied to me very much or most of the time
25	Male	Non-medical	2	Non-smoker	None	4	5	Several days	Not at all	Several days	Several days	Not at all	Several days	Several days	Not at all	Not at all	Applied to me to some degree, or some of the time	Did not apply to me at all	Did not apply to me at all	Did not apply to me at all	Did not apply to me at all	Did not apply to me at all	Did not apply to me at all	Did not apply to me at all	Did not apply to me at all	Did not apply to me at all	Did not apply to me at all	Did not apply to me at all	Did not apply to me at all	Did not apply to me at all	Did not apply to me at all	Did not apply to me at all	Did not apply to me at all	Did not apply to me at all	Applied to me to some degree, or some of the time	Did not apply to me at all	Did not apply to me at all
23	Male	Medical	5	Former smoker	None	6	5	Several days	More than half the days	Nearly every day	More than half the days	Several days	Several days	Nearly every day	Nearly every day	Nearly every day	Applied to me to some degree, or some of the time	Applied to me to some degree, or some of the time	Applied to me to some degree, or some of the time	Applied to me to a considerable degree or a good part of time	Applied to me to a considerable degree or a good part of time	Applied to me to some degree, or some of the time	Applied to me to a considerable degree or a good part of time	Applied to me very much or most of the time	Applied to me to a considerable degree or a good part of time	Applied to me to a considerable degree or a good part of time	Applied to me very much or most of the time	Applied to me to a considerable degree or a good part of time	Applied to me to some degree, or some of the time	Applied to me to some degree, or some of the time	Applied to me to some degree, or some of the time	Applied to me to some degree, or some of the time	Applied to me very much or most of the time	Applied to me very much or most of the time	Applied to me to a considerable degree or a good part of time	Applied to me to a considerable degree or a good part of time	Applied to me to a considerable degree or a good part of time
21	Female	Medical	3	Non-smoker	None	7	5	Several days	Nearly every day	Several days	More than half the days	Not at all	Several days	Not at all	Not at all	Not at all	Applied to me to some degree, or some of the time	Applied to me to a considerable degree or a good part of time	Applied to me to a considerable degree or a good part of time	Did not apply to me at all	Did not apply to me at all	Applied to me to some degree, or some of the time	Applied to me to some degree, or some of the time	Did not apply to me at all	Did not apply to me at all	Applied to me to some degree, or some of the time	Applied to me to a considerable degree or a good part of time	Applied to me very much or most of the time	Applied to me to a considerable degree or a good part of time	Applied to me to some degree, or some of the time	Applied to me to a considerable degree or a good part of time	Applied to me to a considerable degree or a good part of time	Applied to me to some degree, or some of the time	Did not apply to me at all	Applied to me to some degree, or some of the time	Applied to me to some degree, or some of the time	Did not apply to me at all
21	Female	Medical	3	Non-smoker	None	4	8	More than half the days	Several days	Not at all	Not at all	Not at all	Not at all	Not at all	Not at all	Not at all	Did not apply to me at all	Applied to me to some degree, or some of the time	Applied to me to some degree, or some of the time	Did not apply to me at all	Did not apply to me at all	Applied to me to some degree, or some of the time	Did not apply to me at all	Did not apply to me at all	Did not apply to me at all	Did not apply to me at all	Applied to me to some degree, or some of the time	Did not apply to me at all	Did not apply to me at all	Did not apply to me at all	Did not apply to me at all	Did not apply to me at all	Did not apply to me at all	Did not apply to me at all	Did not apply to me at all	Did not apply to me at all	Did not apply to me at all
20	Female	Medical	3	Non-smoker	None	7	10	Several days	Several days	Not at all	Nearly every day	More than half the days	Several days	Not at all	Not at all	Not at all	Did not apply to me at all	Applied to me to some degree, or some of the time	Applied to me to a considerable degree or a good part of time	Did not apply to me at all	Applied to me to some degree, or some of the time	Applied to me very much or most of the time	Did not apply to me at all	Applied to me to some degree, or some of the time	Applied to me to a considerable degree or a good part of time	Applied to me to some degree, or some of the time	Applied to me to some degree, or some of the time	Applied to me to a considerable degree or a good part of time	Applied to me to some degree, or some of the time	Applied to me to some degree, or some of the time	Applied to me to some degree, or some of the time	Did not apply to me at all	Applied to me to some degree, or some of the time	Applied to me to some degree, or some of the time	Did not apply to me at all	Did not apply to me at all	Applied to me very much or most of the time
26	Female	Non-medical	5	Non-smoker	None	10	9	Several days	Nearly every day	Nearly every day	Nearly every day	Nearly every day	Several days	Nearly every day	Several days	Not at all	Applied to me to some degree, or some of the time	Applied to me very much or most of the time	Applied to me to some degree, or some of the time	Applied to me very much or most of the time	Applied to me to a considerable degree or a good part of time	Applied to me to some degree, or some of the time	Applied to me to a considerable degree or a good part of time	Applied to me very much or most of the time	Applied to me to a considerable degree or a good part of time	Did not apply to me at all	Applied to me very much or most of the time	Applied to me to a considerable degree or a good part of time	Applied to me to a considerable degree or a good part of time	Applied to me to a considerable degree or a good part of time	Applied to me to a considerable degree or a good part of time	Applied to me very much or most of the time	Did not apply to me at all	Applied to me very much or most of the time	Applied to me to a considerable degree or a good part of time	Did not apply to me at all	Did not apply to me at all
19	Female	Medical	3	Non-smoker	None	5	8	Not at all	Several days	Several days	More than half the days	Not at all	Several days	Nearly every day	Not at all	Several days	Did not apply to me at all	Applied to me to some degree, or some of the time	Did not apply to me at all	Did not apply to me at all	Did not apply to me at all	Applied to me to some degree, or some of the time	Did not apply to me at all	Applied to me to some degree, or some of the time	Applied to me to some degree, or some of the time	Applied to me to some degree, or some of the time	Applied to me to some degree, or some of the time	Did not apply to me at all	Applied to me to some degree, or some of the time	Did not apply to me at all	Did not apply to me at all	Did not apply to me at all	Did not apply to me at all	Applied to me to some degree, or some of the time	Applied to me to some degree, or some of the time	Did not apply to me at all	Applied to me to some degree, or some of the time
19	Male	Non-medical	1	Non-smoker	None	5	5	More than half the days	Several days	Nearly every day	More than half the days	More than half the days	More than half the days	More than half the days	Several days	Not at all	Applied to me to some degree, or some of the time	Did not apply to me at all	Applied to me to some degree, or some of the time	Did not apply to me at all	Applied to me very much or most of the time	Applied to me to a considerable degree or a good part of time	Applied to me to some degree, or some of the time	Applied to me to some degree, or some of the time	Applied to me to some degree, or some of the time	Applied to me to some degree, or some of the time	Applied to me to a considerable degree or a good part of time	Applied to me to a considerable degree or a good part of time	Applied to me to some degree, or some of the time	Applied to me to some degree, or some of the time	Did not apply to me at all	Applied to me to some degree, or some of the time	Applied to me to some degree, or some of the time	Did not apply to me at all	Applied to me to some degree, or some of the time	Applied to me to some degree, or some of the time	Did not apply to me at all
23	Male	Non-medical	4	Non-smoker	None	1	10	Nearly every day	Not at all	Several days	Several days	Not at all	Not at all	Not at all	Not at all	Not at all	Did not apply to me at all	Applied to me to some degree, or some of the time	Did not apply to me at all	Applied to me to some degree, or some of the time	Did not apply to me at all	Applied to me to a considerable degree or a good part of time	Did not apply to me at all	Did not apply to me at all	Did not apply to me at all	Applied to me very much or most of the time	Did not apply to me at all	Did not apply to me at all	Did not apply to me at all	Did not apply to me at all	Did not apply to me at all	Applied to me to some degree, or some of the time	Did not apply to me at all	Did not apply to me at all	Did not apply to me at all	Applied to me to a considerable degree or a good part of time	Did not apply to me at all
18	Male	Medical	1	Non-smoker	None	2	7	More than half the days	Several days	Not at all	Several days	Several days	Several days	Not at all	Several days	Not at all	Applied to me to some degree, or some of the time	Did not apply to me at all	Did not apply to me at all	Did not apply to me at all	Applied to me to some degree, or some of the time	Did not apply to me at all	Did not apply to me at all	Did not apply to me at all	Did not apply to me at all	Applied to me to some degree, or some of the time	Did not apply to me at all	Did not apply to me at all	Did not apply to me at all	Did not apply to me at all	Did not apply to me at all	Did not apply to me at all	Did not apply to me at all	Did not apply to me at all	Did not apply to me at all	Did not apply to me at all	Did not apply to me at all
23	Male	Non-medical	4	Current smoker	None	8	4	Several days	More than half the days	Several days	More than half the days	Nearly every day	Several days	More than half the days	Several days	More than half the days	Applied to me to a considerable degree or a good part of time	Applied to me to a considerable degree or a good part of time	Applied to me to some degree, or some of the time	Applied to me to a considerable degree or a good part of time	Applied to me to some degree, or some of the time	Applied to me very much or most of the time	Applied to me to some degree, or some of the time	Applied to me to some degree, or some of the time	Applied to me to some degree, or some of the time	Applied to me to a considerable degree or a good part of time	Applied to me very much or most of the time	Applied to me very much or most of the time	Applied to me very much or most of the time	Applied to me to a considerable degree or a good part of time	Applied to me very much or most of the time	Applied to me to a considerable degree or a good part of time	Applied to me to a considerable degree or a good part of time	Applied to me very much or most of the time	Applied to me to some degree, or some of the time	Applied to me very much or most of the time	Applied to me very much or most of the time
21	Male	Non-medical	2	Former smoker	None	4	9	Several days	Not at all	More than half the days	Not at all	Not at all	Not at all	Several days	Not at all	Not at all	Did not apply to me at all	Applied to me to some degree, or some of the time	Applied to me to some degree, or some of the time	Did not apply to me at all	Did not apply to me at all	Did not apply to me at all	Did not apply to me at all	Applied to me to some degree, or some of the time	Did not apply to me at all	Did not apply to me at all	Applied to me to some degree, or some of the time	Applied to me very much or most of the time	Applied to me to some degree, or some of the time	Applied to me to some degree, or some of the time	Applied to me to some degree, or some of the time	Applied to me to some degree, or some of the time	Applied to me to some degree, or some of the time	Applied to me to some degree, or some of the time	Did not apply to me at all	Did not apply to me at all	Did not apply to me at all
21	Male	Medical	1	Current smoker	None	4	7	Several days	Several days	Several days	More than half the days	Not at all	Several days	Nearly every day	Not at all	Not at all	Did not apply to me at all	Applied to me to some degree, or some of the time	Did not apply to me at all	Applied to me to some degree, or some of the time	Applied to me to some degree, or some of the time	Applied to me to some degree, or some of the time	Applied to me to some degree, or some of the time	Applied to me to some degree, or some of the time	Applied to me to some degree, or some of the time	Did not apply to me at all	Applied to me to some degree, or some of the time	Applied to me to some degree, or some of the time	Applied to me to some degree, or some of the time	Applied to me to some degree, or some of the time	Did not apply to me at all	Did not apply to me at all	Did not apply to me at all	Did not apply to me at all	Applied to me to some degree, or some of the time	Applied to me to some degree, or some of the time	Did not apply to me at all
23	Male	Medical	3	Non-smoker	None	7	5	Several days	Several days	Not at all	Several days	Not at all	Not at all	Not at all	Several days	Not at all	Applied to me to some degree, or some of the time	Did not apply to me at all	Did not apply to me at all	Did not apply to me at all	Did not apply to me at all	Did not apply to me at all	Applied to me to some degree, or some of the time	Applied to me to a considerable degree or a good part of time	Applied to me to some degree, or some of the time	Did not apply to me at all	Applied to me to some degree, or some of the time	Applied to me to some degree, or some of the time	Applied to me to some degree, or some of the time	Did not apply to me at all	Applied to me to some degree, or some of the time	Did not apply to me at all	Applied to me to some degree, or some of the time	Did not apply to me at all	Did not apply to me at all	Did not apply to me at all	Did not apply to me at all
20	Female	Medical	1	Non-smoker	None	4	4	Several days	More than half the days	Not at all	Several days	Not at all	Not at all	Several days	Not at all	Not at all	Applied to me to some degree, or some of the time	Did not apply to me at all	Did not apply to me at all	Did not apply to me at all	Did not apply to me at all	Applied to me to some degree, or some of the time	Did not apply to me at all	Did not apply to me at all	Applied to me to some degree, or some of the time	Did not apply to me at all	Applied to me to a considerable degree or a good part of time	Applied to me to some degree, or some of the time	Applied to me to some degree, or some of the time	Applied to me to some degree, or some of the time	Did not apply to me at all	Applied to me to some degree, or some of the time	Did not apply to me at all	Applied to me to some degree, or some of the time	Applied to me to some degree, or some of the time	Did not apply to me at all	Did not apply to me at all
22	Female	Medical	2	Non-smoker	None	2	6	Nearly every day	Not at all	More than half the days	More than half the days	Not at all	Not at all	More than half the days	Not at all	Not at all	Applied to me to some degree, or some of the time	Did not apply to me at all	Did not apply to me at all	Did not apply to me at all	Applied to me to some degree, or some of the time	Applied to me to some degree, or some of the time	Did not apply to me at all	Did not apply to me at all	Applied to me to some degree, or some of the time	Did not apply to me at all	Did not apply to me at all	Did not apply to me at all	Did not apply to me at all	Did not apply to me at all	Did not apply to me at all	Did not apply to me at all	Did not apply to me at all	Applied to me to some degree, or some of the time	Did not apply to me at all	Did not apply to me at all	Did not apply to me at all
23	Female	Non-medical	3	Non-smoker	None	6	8	Several days	Several days	Nearly every day	Nearly every day	Nearly every day	More than half the days	Several days	Nearly every day	Several days	Applied to me to some degree, or some of the time	Did not apply to me at all	Applied to me to some degree, or some of the time	Applied to me to a considerable degree or a good part of time	Applied to me very much or most of the time	Applied to me very much or most of the time	Applied to me very much or most of the time	Applied to me to some degree, or some of the time	Applied to me to some degree, or some of the time	Applied to me to some degree, or some of the time	Applied to me to some degree, or some of the time	Applied to me to some degree, or some of the time	Applied to me to a considerable degree or a good part of time	Applied to me to some degree, or some of the time	Applied to me to a considerable degree or a good part of time	Applied to me to some degree, or some of the time	Applied to me to some degree, or some of the time	Applied to me to some degree, or some of the time	Applied to me to some degree, or some of the time	Applied to me to some degree, or some of the time	Applied to me to some degree, or some of the time
19	Female	Non-medical	2	Non-smoker	None	8	3	Several days	More than half the days	Nearly every day	Nearly every day	More than half the days	Nearly every day	More than half the days	More than half the days	More than half the days	Applied to me to a considerable degree or a good part of time	Applied to me to some degree, or some of the time	Applied to me to a considerable degree or a good part of time	Applied to me very much or most of the time	Applied to me to a considerable degree or a good part of time	Applied to me very much or most of the time	Applied to me very much or most of the time	Applied to me to a considerable degree or a good part of time	Applied to me to a considerable degree or a good part of time	Applied to me to a considerable degree or a good part of time	Applied to me very much or most of the time	Applied to me to a considerable degree or a good part of time	Applied to me to a considerable degree or a good part of time	Applied to me to a considerable degree or a good part of time	Applied to me very much or most of the time	Applied to me to a considerable degree or a good part of time	Applied to me very much or most of the time	Applied to me very much or most of the time	Applied to me to a considerable degree or a good part of time	Applied to me to a considerable degree or a good part of time	Applied to me to a considerable degree or a good part of time
21	Female	Non-medical	4	Non-smoker	None	4	8	Several days	Several days	Not at all	Several days	Several days	Not at all	Not at all	Not at all	Not at all	Did not apply to me at all	Did not apply to me at all	Applied to me to some degree, or some of the time	Did not apply to me at all	Did not apply to me at all	Applied to me to some degree, or some of the time	Did not apply to me at all	Applied to me to some degree, or some of the time	Did not apply to me at all	Did not apply to me at all	Applied to me to some degree, or some of the time	Applied to me to some degree, or some of the time	Applied to me to some degree, or some of the time	Did not apply to me at all	Applied to me to some degree, or some of the time	Did not apply to me at all	Did not apply to me at all	Applied to me to some degree, or some of the time	Applied to me to some degree, or some of the time	Did not apply to me at all	Did not apply to me at all
20	Male	Medical	3	Non-smoker	None	3	7	Several days	Several days	Several days	Several days	Several days	Several days	Several days	Several days	Several days	Applied to me to some degree, or some of the time	Applied to me to some degree, or some of the time	Applied to me to some degree, or some of the time	Applied to me to some degree, or some of the time	Applied to me to some degree, or some of the time	Applied to me to some degree, or some of the time	Applied to me to some degree, or some of the time	Applied to me to some degree, or some of the time	Applied to me to some degree, or some of the time	Applied to me to some degree, or some of the time	Applied to me to some degree, or some of the time	Applied to me to some degree, or some of the time	Applied to me to some degree, or some of the time	Applied to me to some degree, or some of the time	Applied to me to some degree, or some of the time	Applied to me to some degree, or some of the time	Applied to me to some degree, or some of the time	Applied to me to some degree, or some of the time	Applied to me to some degree, or some of the time	Applied to me to some degree, or some of the time	Applied to me to some degree, or some of the time
22	Female	Medical	4	Non-smoker	None	2	7	Nearly every day	Not at all	More than half the days	More than half the days	Not at all	More than half the days	Not at all	Nearly every day	Not at all	Applied to me to a considerable degree or a good part of time	Applied to me to some degree, or some of the time	Applied to me to a considerable degree or a good part of time	Did not apply to me at all	Did not apply to me at all	Applied to me to some degree, or some of the time	Applied to me to a considerable degree or a good part of time	Applied to me to some degree, or some of the time	Applied to me to some degree, or some of the time	Did not apply to me at all	Applied to me to a considerable degree or a good part of time	Applied to me to a considerable degree or a good part of time	Did not apply to me at all	Did not apply to me at all	Applied to me to some degree, or some of the time	Did not apply to me at all	Applied to me to some degree, or some of the time	Applied to me to some degree, or some of the time	Applied to me to some degree, or some of the time	Did not apply to me at all	Did not apply to me at all
21	Male	Medical	3	Non-smoker	None	4	8	Several days	Several days	Several days	Several days	Several days	Not at all	Several days	Not at all	Not at all	Did not apply to me at all	Applied to me to some degree, or some of the time	Did not apply to me at all	Did not apply to me at all	Did not apply to me at all	Did not apply to me at all	Did not apply to me at all	Did not apply to me at all	Did not apply to me at all	Did not apply to me at all	Did not apply to me at all	Did not apply to me at all	Did not apply to me at all	Did not apply to me at all	Did not apply to me at all	Did not apply to me at all	Did not apply to me at all	Did not apply to me at all	Did not apply to me at all	Did not apply to me at all	Did not apply to me at all
28	Male	Medical	5	Non-smoker	None	7	4	Not at all	More than half the days	More than half the days	More than half the days	More than half the days	More than half the days	More than half the days	More than half the days	More than half the days	Applied to me very much or most of the time	Applied to me to a considerable degree or a good part of time	Applied to me to some degree, or some of the time	Applied to me very much or most of the time	Applied to me to a considerable degree or a good part of time	Applied to me very much or most of the time	Applied to me to a considerable degree or a good part of time	Did not apply to me at all	Did not apply to me at all	Applied to me to some degree, or some of the time	Applied to me to some degree, or some of the time	Applied to me very much or most of the time	Applied to me to a considerable degree or a good part of time	Applied to me to some degree, or some of the time	Applied to me to a considerable degree or a good part of time	Applied to me to a considerable degree or a good part of time	Applied to me to a considerable degree or a good part of time	Applied to me to a considerable degree or a good part of time	Applied to me very much or most of the time	Applied to me very much or most of the time	Applied to me very much or most of the time
28	Male	Medical	5	Former smoker	Occasional	3	5	More than half the days	More than half the days	Several days	Nearly every day	More than half the days	Not at all	More than half the days	Several days	Several days	Applied to me to a considerable degree or a good part of time	Applied to me to some degree, or some of the time	Applied to me to some degree, or some of the time	Applied to me to a considerable degree or a good part of time	Did not apply to me at all	Applied to me to some degree, or some of the time	Applied to me to some degree, or some of the time	Applied to me to some degree, or some of the time	Applied to me to some degree, or some of the time	Applied to me to some degree, or some of the time	Did not apply to me at all	Did not apply to me at all	Did not apply to me at all	Did not apply to me at all	Did not apply to me at all	Applied to me to some degree, or some of the time	Applied to me to some degree, or some of the time	Applied to me to some degree, or some of the time	Applied to me to some degree, or some of the time	Applied to me to some degree, or some of the time	Applied to me to some degree, or some of the time
18	Female	Medical	1	Non-smoker	None	3	8	More than half the days	Several days	More than half the days	Several days	Nearly every day	Several days	Not at all	Not at all	Not at all	Did not apply to me at all	Applied to me to some degree, or some of the time	Did not apply to me at all	Applied to me to some degree, or some of the time	Applied to me to a considerable degree or a good part of time	Applied to me to some degree, or some of the time	Did not apply to me at all	Applied to me to some degree, or some of the time	Applied to me to a considerable degree or a good part of time	Applied to me to some degree, or some of the time	Did not apply to me at all	Did not apply to me at all	Applied to me to some degree, or some of the time	Applied to me to some degree, or some of the time	Did not apply to me at all	Did not apply to me at all	Did not apply to me at all	Applied to me to some degree, or some of the time	Applied to me to a considerable degree or a good part of time	Applied to me to some degree, or some of the time	Did not apply to me at all
24	Male	Medical	5	Non-smoker	None	9	5	Nearly every day	Nearly every day	More than half the days	More than half the days	Nearly every day	Nearly every day	More than half the days	Not at all	Not at all	Applied to me to a considerable degree or a good part of time	Applied to me very much or most of the time	Applied to me to a considerable degree or a good part of time	Did not apply to me at all	Applied to me to a considerable degree or a good part of time	Applied to me to a considerable degree or a good part of time	Did not apply to me at all	Applied to me to a considerable degree or a good part of time	Did not apply to me at all	Did not apply to me at all	Applied to me to a considerable degree or a good part of time	Applied to me to a considerable degree or a good part of time	Applied to me to a considerable degree or a good part of time	Applied to me to a considerable degree or a good part of time	Applied to me to a considerable degree or a good part of time	Applied to me to a considerable degree or a good part of time	Did not apply to me at all	Applied to me to a considerable degree or a good part of time	Did not apply to me at all	Did not apply to me at all	Did not apply to me at all
22	Female	Medical	4	Non-smoker	None	4	8	More than half the days	Several days	Several days	Several days	Not at all	Not at all	Not at all	Not at all	Several days	Applied to me to a considerable degree or a good part of time	Did not apply to me at all	Did not apply to me at all	Applied to me to a considerable degree or a good part of time	Applied to me very much or most of the time	Applied to me to a considerable degree or a good part of time	Applied to me very much or most of the time	Applied to me very much or most of the time	Applied to me to a considerable degree or a good part of time	Applied to me very much or most of the time	Applied to me to a considerable degree or a good part of time	Applied to me very much or most of the time	Applied to me to a considerable degree or a good part of time	Applied to me to some degree, or some of the time	Applied to me to some degree, or some of the time	Applied to me to a considerable degree or a good part of time	Applied to me very much or most of the time	Applied to me to a considerable degree or a good part of time	Applied to me very much or most of the time	Applied to me very much or most of the time	Applied to me to some degree, or some of the time
18	Male	Medical	2	Current smoker	None	3	3	Not at all	Not at all	Not at all	Not at all	Not at all	Not at all	Not at all	Not at all	Several days	Did not apply to me at all	Applied to me to a considerable degree or a good part of time	Applied to me to a considerable degree or a good part of time	Applied to me to a considerable degree or a good part of time	Applied to me to a considerable degree or a good part of time	Applied to me to a considerable degree or a good part of time	Applied to me to a considerable degree or a good part of time	Applied to me very much or most of the time	Did not apply to me at all	Applied to me to a considerable degree or a good part of time	Applied to me to some degree, or some of the time	Applied to me to some degree, or some of the time	Applied to me to some degree, or some of the time	Applied to me to a considerable degree or a good part of time	Applied to me to a considerable degree or a good part of time	Applied to me to a considerable degree or a good part of time	Applied to me very much or most of the time	Applied to me to a considerable degree or a good part of time	Applied to me to a considerable degree or a good part of time	Applied to me to a considerable degree or a good part of time	Applied to me to a considerable degree or a good part of time
22	Male	Non-medical	4	Non-smoker	None	7	7	Several days	Several days	Several days	More than half the days	More than half the days	Several days	More than half the days	Several days	Several days	Applied to me to some degree, or some of the time	Applied to me to a considerable degree or a good part of time	Applied to me to a considerable degree or a good part of time	Applied to me to some degree, or some of the time	Applied to me to a considerable degree or a good part of time	Applied to me to a considerable degree or a good part of time	Applied to me to some degree, or some of the time	Applied to me to a considerable degree or a good part of time	Applied to me to a considerable degree or a good part of time	Applied to me to a considerable degree or a good part of time	Applied to me to a considerable degree or a good part of time	Applied to me to a considerable degree or a good part of time	Applied to me to a considerable degree or a good part of time	Applied to me to a considerable degree or a good part of time	Applied to me to some degree, or some of the time	Applied to me to a considerable degree or a good part of time	Applied to me to some degree, or some of the time	Applied to me to some degree, or some of the time	Applied to me to a considerable degree or a good part of time	Applied to me to a considerable degree or a good part of time	Applied to me to some degree, or some of the time
21	Female	Medical	4	Non-smoker	None	3	8	Several days	Several days	Several days	Several days	More than half the days	Several days	Several days	Several days	Several days	Applied to me to some degree, or some of the time	Applied to me to a considerable degree or a good part of time	Applied to me to some degree, or some of the time	Did not apply to me at all	Applied to me to some degree, or some of the time	Applied to me to a considerable degree or a good part of time	Applied to me to some degree, or some of the time	Applied to me to some degree, or some of the time	Applied to me to a considerable degree or a good part of time	Applied to me to some degree, or some of the time	Applied to me to a considerable degree or a good part of time	Applied to me to some degree, or some of the time	Applied to me to some degree, or some of the time	Applied to me to a considerable degree or a good part of time	Applied to me to some degree, or some of the time	Applied to me to some degree, or some of the time	Applied to me to some degree, or some of the time	Applied to me to some degree, or some of the time	Applied to me to some degree, or some of the time	Applied to me to some degree, or some of the time	Applied to me to some degree, or some of the time
22	Female	Medical	4	Non-smoker	None	6	10	Not at all	Nearly every day	Nearly every day	Nearly every day	Nearly every day	Nearly every day	Several days	Not at all	Several days	Did not apply to me at all	Did not apply to me at all	Applied to me very much or most of the time	Applied to me to some degree, or some of the time	Applied to me very much or most of the time	Applied to me very much or most of the time	Applied to me to a considerable degree or a good part of time	Applied to me very much or most of the time	Applied to me very much or most of the time	Applied to me to a considerable degree or a good part of time	Applied to me to some degree, or some of the time	Applied to me to some degree, or some of the time	Applied to me to a considerable degree or a good part of time	Applied to me to a considerable degree or a good part of time	Applied to me to some degree, or some of the time	Did not apply to me at all	Applied to me very much or most of the time	Applied to me very much or most of the time	Applied to me to some degree, or some of the time	Applied to me very much or most of the time	Applied to me very much or most of the time
28	Female	Medical	5	Non-smoker	None	4	5	More than half the days	Several days	Not at all	Several days	Not at all	Not at all	Several days	Not at all	Several days	Did not apply to me at all	Applied to me to some degree, or some of the time	Did not apply to me at all	Did not apply to me at all	Did not apply to me at all	Applied to me to some degree, or some of the time	Did not apply to me at all	Did not apply to me at all	Did not apply to me at all	Applied to me to some degree, or some of the time	Applied to me to some degree, or some of the time	Did not apply to me at all	Applied to me to some degree, or some of the time	Applied to me to some degree, or some of the time	Applied to me to some degree, or some of the time	Did not apply to me at all	Did not apply to me at all	Applied to me to some degree, or some of the time	Did not apply to me at all	Applied to me to some degree, or some of the time	Applied to me to some degree, or some of the time
23	Female	Medical	4	Non-smoker	None	7	6	Not at all	Not at all	Several days	Several days	Not at all	Not at all	Several days	Not at all	Not at all	Applied to me to some degree, or some of the time	Did not apply to me at all	Did not apply to me at all	Did not apply to me at all	Applied to me to some degree, or some of the time	Applied to me to some degree, or some of the time	Did not apply to me at all	Applied to me to a considerable degree or a good part of time	Did not apply to me at all	Did not apply to me at all	Applied to me to some degree, or some of the time	Applied to me to some degree, or some of the time	Did not apply to me at all	Did not apply to me at all	Did not apply to me at all	Applied to me to some degree, or some of the time	Did not apply to me at all	Applied to me to some degree, or some of the time	Did not apply to me at all	Did not apply to me at all	Did not apply to me at all
22	Female	Medical	4	Non-smoker	None	4	5	Several days	More than half the days	Several days	More than half the days	More than half the days	Nearly every day	More than half the days	More than half the days	More than half the days	Applied to me to some degree, or some of the time	Applied to me to some degree, or some of the time	Applied to me to a considerable degree or a good part of time	Applied to me to some degree, or some of the time	Applied to me to some degree, or some of the time	Applied to me to a considerable degree or a good part of time	Applied to me to a considerable degree or a good part of time	Applied to me to a considerable degree or a good part of time	Applied to me to some degree, or some of the time	Applied to me to a considerable degree or a good part of time	Applied to me to some degree, or some of the time	Applied to me to some degree, or some of the time	Applied to me to some degree, or some of the time	Applied to me very much or most of the time	Applied to me to a considerable degree or a good part of time	Applied to me to a considerable degree or a good part of time	Applied to me to a considerable degree or a good part of time	Applied to me to a considerable degree or a good part of time	Applied to me to some degree, or some of the time	Applied to me very much or most of the time	Applied to me to a considerable degree or a good part of time
18	Male	Medical	1	Non-smoker	None	3	5	More than half the days	Nearly every day	Not at all	Nearly every day	Not at all	Several days	Not at all	Not at all	Not at all	Applied to me to some degree, or some of the time	Applied to me very much or most of the time	Did not apply to me at all	Applied to me to some degree, or some of the time	Applied to me to some degree, or some of the time	Applied to me very much or most of the time	Applied to me to some degree, or some of the time	Applied to me to a considerable degree or a good part of time	Did not apply to me at all	Did not apply to me at all	Applied to me to some degree, or some of the time	Did not apply to me at all	Did not apply to me at all	Applied to me to a considerable degree or a good part of time	Applied to me to some degree, or some of the time	Applied to me to a considerable degree or a good part of time	Did not apply to me at all	Applied to me to some degree, or some of the time	Applied to me to a considerable degree or a good part of time	Applied to me to some degree, or some of the time	Did not apply to me at all
20	Male	Medical	1	Non-smoker	None	7	5	Several days	Several days	More than half the days	Not at all	Not at all	Several days	More than half the days	Not at all	Not at all	Did not apply to me at all	Did not apply to me at all	Applied to me to some degree, or some of the time	Did not apply to me at all	Applied to me to some degree, or some of the time	Did not apply to me at all	Did not apply to me at all	Applied to me to some degree, or some of the time	Did not apply to me at all	Applied to me to some degree, or some of the time	Applied to me to some degree, or some of the time	Applied to me to some degree, or some of the time	Applied to me to some degree, or some of the time	Did not apply to me at all	Did not apply to me at all	Did not apply to me at all	Did not apply to me at all	Did not apply to me at all	Did not apply to me at all	Did not apply to me at all	Did not apply to me at all
19	Male	Medical	1	Current smoker	None	1	10	More than half the days	Not at all	Not at all	Not at all	Not at all	Not at all	Not at all	Not at all	Not at all	Did not apply to me at all	Did not apply to me at all	Did not apply to me at all	Did not apply to me at all	Did not apply to me at all	Did not apply to me at all	Did not apply to me at all	Did not apply to me at all	Did not apply to me at all	Did not apply to me at all	Did not apply to me at all	Did not apply to me at all	Did not apply to me at all	Did not apply to me at all	Did not apply to me at all	Did not apply to me at all	Did not apply to me at all	Did not apply to me at all	Did not apply to me at all	Did not apply to me at all	Did not apply to me at all
21	Female	Medical	4	Non-smoker	None	7	7	More than half the days	Several days	Nearly every day	More than half the days	Nearly every day	Not at all	Not at all	Not at all	Not at all	Applied to me to some degree, or some of the time	Applied to me to a considerable degree or a good part of time	Did not apply to me at all	Applied to me to some degree, or some of the time	Applied to me to some degree, or some of the time	Applied to me to some degree, or some of the time	Applied to me to some degree, or some of the time	Applied to me to some degree, or some of the time	Applied to me to some degree, or some of the time	Applied to me to some degree, or some of the time	Applied to me to some degree, or some of the time	Applied to me to some degree, or some of the time	Applied to me to some degree, or some of the time	Applied to me very much or most of the time	Applied to me to a considerable degree or a good part of time	Applied to me to some degree, or some of the time	Did not apply to me at all	Applied to me to some degree, or some of the time	Applied to me to a considerable degree or a good part of time	Applied to me very much or most of the time	Applied to me to some degree, or some of the time
22	Male	Medical	3	Non-smoker	None	7	8	Not at all	Not at all	Several days	Not at all	Not at all	More than half the days	More than half the days	Several days	Not at all	Did not apply to me at all	Did not apply to me at all	Did not apply to me at all	Did not apply to me at all	Did not apply to me at all	Did not apply to me at all	Did not apply to me at all	Did not apply to me at all	Did not apply to me at all	Did not apply to me at all	Did not apply to me at all	Did not apply to me at all	Did not apply to me at all	Did not apply to me at all	Did not apply to me at all	Did not apply to me at all	Did not apply to me at all	Did not apply to me at all	Did not apply to me at all	Did not apply to me at all	Did not apply to me at all
18	Female	Medical	1	Non-smoker	None	5	4	More than half the days	Several days	Several days	More than half the days	Several days	More than half the days	Several days	Several days	Several days	Did not apply to me at all	Applied to me to some degree, or some of the time	Did not apply to me at all	Applied to me to some degree, or some of the time	Applied to me to some degree, or some of the time	Applied to me to a considerable degree or a good part of time	Applied to me to some degree, or some of the time	Applied to me to some degree, or some of the time	Applied to me to some degree, or some of the time	Did not apply to me at all	Applied to me to some degree, or some of the time	Applied to me to some degree, or some of the time	Did not apply to me at all	Did not apply to me at all	Did not apply to me at all	Did not apply to me at all	Did not apply to me at all	Applied to me to some degree, or some of the time	Applied to me to some degree, or some of the time	Applied to me to some degree, or some of the time	Did not apply to me at all
21	Female	Medical	4	Non-smoker	Occasional	4	7	More than half the days	Not at all	Nearly every day	Nearly every day	Nearly every day	More than half the days	Nearly every day	Nearly every day	More than half the days	Applied to me to some degree, or some of the time	Applied to me to some degree, or some of the time	Did not apply to me at all	Applied to me to some degree, or some of the time	Applied to me to a considerable degree or a good part of time	Applied to me very much or most of the time	Applied to me very much or most of the time	Applied to me very much or most of the time	Applied to me very much or most of the time	Applied to me very much or most of the time	Applied to me to a considerable degree or a good part of time	Applied to me very much or most of the time	Applied to me to a considerable degree or a good part of time	Applied to me to some degree, or some of the time	Applied to me to a considerable degree or a good part of time	Applied to me to a considerable degree or a good part of time	Applied to me to a considerable degree or a good part of time	Applied to me very much or most of the time	Applied to me to some degree, or some of the time	Applied to me very much or most of the time	Applied to me to some degree, or some of the time
24	Male	Non-medical	4	Non-smoker	None	2	7	Several days	Not at all	Several days	Several days	More than half the days	Not at all	Not at all	Not at all	Not at all	Applied to me to some degree, or some of the time	Applied to me to some degree, or some of the time	Did not apply to me at all	Did not apply to me at all	Applied to me to some degree, or some of the time	Applied to me to some degree, or some of the time	Did not apply to me at all	Did not apply to me at all	Applied to me to some degree, or some of the time	Did not apply to me at all	Did not apply to me at all	Did not apply to me at all	Did not apply to me at all	Applied to me to some degree, or some of the time	Did not apply to me at all	Did not apply to me at all	Did not apply to me at all	Did not apply to me at all	Did not apply to me at all	Did not apply to me at all	Did not apply to me at all
19	Female	Medical	1	Non-smoker	None	6	7	Nearly every day	More than half the days	Not at all	More than half the days	Nearly every day	Nearly every day	More than half the days	Nearly every day	Not at all	Did not apply to me at all	Did not apply to me at all	Did not apply to me at all	Did not apply to me at all	Applied to me to some degree, or some of the time	Did not apply to me at all	Applied to me to some degree, or some of the time	Applied to me to some degree, or some of the time	Applied to me very much or most of the time	Applied to me to a considerable degree or a good part of time	Did not apply to me at all	Did not apply to me at all	Applied to me to some degree, or some of the time	Did not apply to me at all	Applied to me very much or most of the time	Applied to me to some degree, or some of the time	Applied to me to some degree, or some of the time	Applied to me very much or most of the time	Did not apply to me at all	Did not apply to me at all	Did not apply to me at all
18	Female	Medical	1	Non-smoker	None	9	5	Several days	Several days	More than half the days	More than half the days	Several days	More than half the days	More than half the days	Several days	Several days	Applied to me to some degree, or some of the time	Did not apply to me at all	Applied to me to a considerable degree or a good part of time	Applied to me to a considerable degree or a good part of time	Applied to me to a considerable degree or a good part of time	Did not apply to me at all	Applied to me to a considerable degree or a good part of time	Applied to me to a considerable degree or a good part of time	Applied to me very much or most of the time	Applied to me to some degree, or some of the time	Applied to me very much or most of the time	Applied to me to a considerable degree or a good part of time	Applied to me very much or most of the time	Applied to me to a considerable degree or a good part of time	Applied to me to a considerable degree or a good part of time	Applied to me to a considerable degree or a good part of time	Applied to me to some degree, or some of the time	Applied to me very much or most of the time	Applied to me very much or most of the time	Applied to me to some degree, or some of the time	Did not apply to me at all
24	Male	Medical	1	Current smoker	None	10	3	Several days	Several days	Not at all	Not at all	Not at all	Several days	Several days	Several days	Several days	Did not apply to me at all	Did not apply to me at all	Applied to me to some degree, or some of the time	Did not apply to me at all	Applied to me to some degree, or some of the time	Applied to me to some degree, or some of the time	Applied to me to some degree, or some of the time	Applied to me to some degree, or some of the time	Applied to me to some degree, or some of the time	Applied to me to some degree, or some of the time	Applied to me to some degree, or some of the time	Applied to me to some degree, or some of the time	Applied to me to some degree, or some of the time	Applied to me to some degree, or some of the time	Applied to me to some degree, or some of the time	Applied to me to some degree, or some of the time	Applied to me to some degree, or some of the time	Applied to me to some degree, or some of the time	Applied to me to some degree, or some of the time	Applied to me to some degree, or some of the time	Applied to me to some degree, or some of the time
22	Male	Non-medical	4	Non-smoker	None	7	5	Several days	Nearly every day	Nearly every day	Nearly every day	Nearly every day	Several days	Several days	More than half the days	Not at all	Did not apply to me at all	Did not apply to me at all	Applied to me to a considerable degree or a good part of time	Applied to me to some degree, or some of the time	Applied to me to a considerable degree or a good part of time	Applied to me to some degree, or some of the time	Applied to me to some degree, or some of the time	Applied to me to some degree, or some of the time	Applied to me very much or most of the time	Applied to me very much or most of the time	Applied to me to a considerable degree or a good part of time	Applied to me to some degree, or some of the time	Applied to me to a considerable degree or a good part of time	Applied to me to some degree, or some of the time	Applied to me to a considerable degree or a good part of time	Applied to me very much or most of the time	Applied to me very much or most of the time	Applied to me very much or most of the time	Applied to me to some degree, or some of the time	Applied to me very much or most of the time	Applied to me to some degree, or some of the time
20	Female	Medical	1	Non-smoker	None	8	4	Several days	Nearly every day	Not at all	Not at all	Not at all	Not at all	Not at all	Not at all	Not at all	Applied to me to some degree, or some of the time	Applied to me to some degree, or some of the time	Applied to me very much or most of the time	Applied to me very much or most of the time	Applied to me to a considerable degree or a good part of time	Applied to me to some degree, or some of the time	Applied to me to some degree, or some of the time	Applied to me to some degree, or some of the time	Applied to me to a considerable degree or a good part of time	Applied to me to a considerable degree or a good part of time	Applied to me to some degree, or some of the time	Applied to me to a considerable degree or a good part of time	Applied to me to a considerable degree or a good part of time	Applied to me to some degree, or some of the time	Applied to me to some degree, or some of the time	Applied to me to some degree, or some of the time	Applied to me to some degree, or some of the time	Applied to me to some degree, or some of the time	Applied to me to a considerable degree or a good part of time	Applied to me to a considerable degree or a good part of time	Applied to me to a considerable degree or a good part of time
23	Male	Medical	4	Non-smoker	None	1	7	Several days	Not at all	Not at all	Several days	Nearly every day	Not at all	Not at all	Several days	Not at all	Did not apply to me at all	Applied to me to some degree, or some of the time	Did not apply to me at all	Did not apply to me at all	Did not apply to me at all	Did not apply to me at all	Applied to me to some degree, or some of the time	Did not apply to me at all	Applied to me to some degree, or some of the time	Did not apply to me at all	Did not apply to me at all	Did not apply to me at all	Did not apply to me at all	Did not apply to me at all	Did not apply to me at all	Did not apply to me at all	Applied to me to some degree, or some of the time	Applied to me to some degree, or some of the time	Applied to me to some degree, or some of the time	Applied to me to some degree, or some of the time	Did not apply to me at all
18	Female	Medical	1	Non-smoker	None	8	6	Nearly every day	More than half the days	Nearly every day	Not at all	More than half the days	Not at all	More than half the days	Several days	Not at all	Applied to me very much or most of the time	Applied to me very much or most of the time	Did not apply to me at all	Did not apply to me at all	Applied to me to a considerable degree or a good part of time	Applied to me very much or most of the time	Did not apply to me at all	Applied to me very much or most of the time	Applied to me very much or most of the time	Applied to me to some degree, or some of the time	Applied to me very much or most of the time	Applied to me to some degree, or some of the time	Applied to me to a considerable degree or a good part of time	Applied to me very much or most of the time	Applied to me to a considerable degree or a good part of time	Applied to me very much or most of the time	Applied to me to a considerable degree or a good part of time	Applied to me very much or most of the time	Applied to me to some degree, or some of the time	Applied to me to some degree, or some of the time	Did not apply to me at all
17	Male	Non-medical	1	Non-smoker	None	5	7	Several days	More than half the days	Nearly every day	Not at all	Nearly every day	Not at all	Not at all	More than half the days	Nearly every day	Did not apply to me at all	Applied to me to some degree, or some of the time	Applied to me very much or most of the time	Did not apply to me at all	Applied to me to some degree, or some of the time	Applied to me to some degree, or some of the time	Did not apply to me at all	Applied to me to a considerable degree or a good part of time	Applied to me very much or most of the time	Applied to me to a considerable degree or a good part of time	Applied to me to a considerable degree or a good part of time	Applied to me to a considerable degree or a good part of time	Applied to me very much or most of the time	Applied to me very much or most of the time	Applied to me to a considerable degree or a good part of time	Did not apply to me at all	Did not apply to me at all	Applied to me to a considerable degree or a good part of time	Applied to me to a considerable degree or a good part of time	Applied to me very much or most of the time	Did not apply to me at all
23	Male	Non-medical	4	Non-smoker	None	2	7	Nearly every day	Several days	Not at all	Nearly every day	Not at all	Nearly every day	Not at all	Not at all	Not at all	Did not apply to me at all	Did not apply to me at all	Did not apply to me at all	Did not apply to me at all	Applied to me to some degree, or some of the time	Did not apply to me at all	Applied to me to some degree, or some of the time	Did not apply to me at all	Did not apply to me at all	Did not apply to me at all	Did not apply to me at all	Did not apply to me at all	Applied to me to some degree, or some of the time	Did not apply to me at all	Applied to me to some degree, or some of the time	Did not apply to me at all	Did not apply to me at all	Did not apply to me at all	Did not apply to me at all	Did not apply to me at all	Did not apply to me at all
20	Female	Medical	1	Non-smoker	None	4	6	Not at all	Several days	Not at all	Several days	Several days	Several days	Not at all	Not at all	Not at all	Applied to me to a considerable degree or a good part of time	Applied to me very much or most of the time	Did not apply to me at all	Did not apply to me at all	Did not apply to me at all	Did not apply to me at all	Did not apply to me at all	Applied to me to some degree, or some of the time	Applied to me to some degree, or some of the time	Applied to me to a considerable degree or a good part of time	Did not apply to me at all	Did not apply to me at all	Applied to me to some degree, or some of the time	Did not apply to me at all	Did not apply to me at all	Applied to me to some degree, or some of the time	Did not apply to me at all	Did not apply to me at all	Applied to me to some degree, or some of the time	Did not apply to me at all	Did not apply to me at all
27	Male	Non-medical	5	Current smoker	None	2	7	More than half the days	Several days	Several days	Not at all	Not at all	Several days	Several days	Several days	Not at all	Applied to me to some degree, or some of the time	Applied to me to some degree, or some of the time	Applied to me to some degree, or some of the time	Applied to me to some degree, or some of the time	Applied to me to some degree, or some of the time	Applied to me to some degree, or some of the time	Applied to me to some degree, or some of the time	Applied to me to some degree, or some of the time	Applied to me to some degree, or some of the time	Applied to me to some degree, or some of the time	Applied to me to some degree, or some of the time	Applied to me to some degree, or some of the time	Applied to me to some degree, or some of the time	Applied to me to some degree, or some of the time	Applied to me to some degree, or some of the time	Applied to me to some degree, or some of the time	Applied to me to some degree, or some of the time	Applied to me very much or most of the time	Applied to me to a considerable degree or a good part of time	Did not apply to me at all	Applied to me to some degree, or some of the time
18	Female	Medical	1	Non-smoker	None	7	10	More than half the days	Several days	Nearly every day	More than half the days	Several days	Several days	Nearly every day	Several days	Not at all	Applied to me to some degree, or some of the time	Applied to me to some degree, or some of the time	Applied to me very much or most of the time	Applied to me to some degree, or some of the time	Applied to me very much or most of the time	Applied to me to some degree, or some of the time	Did not apply to me at all	Applied to me to some degree, or some of the time	Did not apply to me at all	Applied to me to some degree, or some of the time	Applied to me to some degree, or some of the time	Did not apply to me at all	Applied to me to some degree, or some of the time	Applied to me very much or most of the time	Did not apply to me at all	Applied to me very much or most of the time	Did not apply to me at all	Did not apply to me at all	Applied to me to some degree, or some of the time	Did not apply to me at all	Did not apply to me at all
19	Male	Medical	1	Non-smoker	None	2	6	Several days	Not at all	Not at all	Not at all	Not at all	Not at all	Not at all	Several days	Not at all	Did not apply to me at all	Applied to me to some degree, or some of the time	Did not apply to me at all	Applied to me to some degree, or some of the time	Applied to me to some degree, or some of the time	Applied to me to some degree, or some of the time	Applied to me to some degree, or some of the time	Applied to me to some degree, or some of the time	Applied to me to a considerable degree or a good part of time	Did not apply to me at all	Applied to me to some degree, or some of the time	Did not apply to me at all	Did not apply to me at all	Did not apply to me at all	Applied to me to some degree, or some of the time	Did not apply to me at all	Did not apply to me at all	Applied to me to some degree, or some of the time	Applied to me to some degree, or some of the time	Did not apply to me at all	Did not apply to me at all
22	Female	Non-medical	4	Non-smoker	None	7	5	More than half the days	Nearly every day	Nearly every day	Several days	Nearly every day	Nearly every day	Several days	More than half the days	More than half the days	Applied to me to a considerable degree or a good part of time	Applied to me to some degree, or some of the time	Applied to me to a considerable degree or a good part of time	Applied to me to some degree, or some of the time	Applied to me to a considerable degree or a good part of time	Applied to me to a considerable degree or a good part of time	Applied to me very much or most of the time	Applied to me very much or most of the time	Applied to me very much or most of the time	Applied to me very much or most of the time	Applied to me very much or most of the time	Applied to me to a considerable degree or a good part of time	Applied to me very much or most of the time	Applied to me to a considerable degree or a good part of time	Applied to me very much or most of the time	Applied to me to a considerable degree or a good part of time	Applied to me very much or most of the time	Applied to me very much or most of the time	Applied to me to a considerable degree or a good part of time	Applied to me very much or most of the time	Applied to me very much or most of the time
23	Male	Non-medical	2	Non-smoker	None	8	6	Several days	More than half the days	Not at all	More than half the days	Not at all	More than half the days	Several days	Several days	Several days	Applied to me to some degree, or some of the time	Did not apply to me at all	Applied to me to some degree, or some of the time	Did not apply to me at all	Applied to me very much or most of the time	Did not apply to me at all	Did not apply to me at all	Applied to me to a considerable degree or a good part of time	Applied to me to a considerable degree or a good part of time	Applied to me to a considerable degree or a good part of time	Applied to me to a considerable degree or a good part of time	Applied to me to some degree, or some of the time	Applied to me to a considerable degree or a good part of time	Applied to me to some degree, or some of the time	Applied to me to some degree, or some of the time	Applied to me to some degree, or some of the time	Applied to me to a considerable degree or a good part of time	Did not apply to me at all	Applied to me to some degree, or some of the time	Did not apply to me at all	Applied to me to some degree, or some of the time
21	Female	Medical	2	Non-smoker	None	5	5	Several days	Several days	Not at all	More than half the days	Not at all	Not at all	Not at all	Not at all	Not at all	Did not apply to me at all	Did not apply to me at all	Did not apply to me at all	Applied to me to some degree, or some of the time	Applied to me to some degree, or some of the time	Applied to me to some degree, or some of the time	Did not apply to me at all	Applied to me to some degree, or some of the time	Applied to me to some degree, or some of the time	Did not apply to me at all	Did not apply to me at all	Applied to me to some degree, or some of the time	Applied to me to some degree, or some of the time	Applied to me to some degree, or some of the time	Applied to me to some degree, or some of the time	Did not apply to me at all	Did not apply to me at all	Applied to me to some degree, or some of the time	Applied to me to some degree, or some of the time	Applied to me to some degree, or some of the time	Did not apply to me at all
22	Female	Medical	4	Non-smoker	None	1	6	Not at all	Not at all	Several days	Not at all	Not at all	Not at all	Not at all	Not at all	Not at all	Applied to me to some degree, or some of the time	Did not apply to me at all	Did not apply to me at all	Applied to me to some degree, or some of the time	Applied to me to some degree, or some of the time	Did not apply to me at all	Did not apply to me at all	Did not apply to me at all	Applied to me to some degree, or some of the time	Did not apply to me at all	Did not apply to me at all	Applied to me to some degree, or some of the time	Applied to me to some degree, or some of the time	Did not apply to me at all	Applied to me to some degree, or some of the time	Applied to me to some degree, or some of the time	Did not apply to me at all	Applied to me to some degree, or some of the time	Applied to me to some degree, or some of the time	Did not apply to me at all	Did not apply to me at all
21	Female	Medical	4	Non-smoker	None	4	6	Nearly every day	Several days	Several days	Several days	Not at all	Several days	Not at all	Not at all	Not at all	Did not apply to me at all	Did not apply to me at all	Applied to me to some degree, or some of the time	Did not apply to me at all	Applied to me to some degree, or some of the time	Applied to me to some degree, or some of the time	Did not apply to me at all	Applied to me to some degree, or some of the time	Applied to me to some degree, or some of the time	Applied to me to some degree, or some of the time	Applied to me to some degree, or some of the time	Did not apply to me at all	Applied to me to some degree, or some of the time	Did not apply to me at all	Did not apply to me at all	Did not apply to me at all	Applied to me to some degree, or some of the time	Applied to me to some degree, or some of the time	Did not apply to me at all	Applied to me to some degree, or some of the time	Applied to me to some degree, or some of the time
23	Male	Medical	5	Current smoker	Occasional	8	4	Nearly every day	Nearly every day	Nearly every day	Nearly every day	More than half the days	Not at all	Nearly every day	Nearly every day	Nearly every day	Did not apply to me at all	Did not apply to me at all	Applied to me to a considerable degree or a good part of time	Applied to me to a considerable degree or a good part of time	Applied to me to some degree, or some of the time	Applied to me to a considerable degree or a good part of time	Did not apply to me at all	Did not apply to me at all	Applied to me to a considerable degree or a good part of time	Applied to me very much or most of the time	Applied to me very much or most of the time	Applied to me to a considerable degree or a good part of time	Applied to me very much or most of the time	Applied to me very much or most of the time	Applied to me very much or most of the time	Applied to me very much or most of the time	Applied to me very much or most of the time	Applied to me very much or most of the time	Applied to me very much or most of the time	Applied to me very much or most of the time	Applied to me very much or most of the time
21	Female	Medical	2	Non-smoker	None	6	7	Nearly every day	Nearly every day	More than half the days	Nearly every day	Nearly every day	Nearly every day	Several days	Several days	Several days	Applied to me to some degree, or some of the time	Applied to me to a considerable degree or a good part of time	Applied to me to some degree, or some of the time	Applied to me to some degree, or some of the time	Applied to me to some degree, or some of the time	Applied to me very much or most of the time	Applied to me to some degree, or some of the time	Applied to me to a considerable degree or a good part of time	Applied to me very much or most of the time	Applied to me very much or most of the time	Applied to me very much or most of the time	Applied to me to a considerable degree or a good part of time	Applied to me very much or most of the time	Applied to me very much or most of the time	Applied to me to a considerable degree or a good part of time	Applied to me very much or most of the time	Applied to me very much or most of the time	Applied to me very much or most of the time	Applied to me very much or most of the time	Applied to me to a considerable degree or a good part of time	Applied to me to some degree, or some of the time
24	Female	Medical	4	Non-smoker	None	7	6	More than half the days	Several days	More than half the days	Not at all	Not at all	Several days	More than half the days	Not at all	Several days	Applied to me to some degree, or some of the time	Applied to me to some degree, or some of the time	Applied to me very much or most of the time	Did not apply to me at all	Applied to me to some degree, or some of the time	Applied to me very much or most of the time	Applied to me to a considerable degree or a good part of time	Applied to me to some degree, or some of the time	Applied to me very much or most of the time	Applied to me to a considerable degree or a good part of time	Applied to me very much or most of the time	Applied to me to some degree, or some of the time	Applied to me to a considerable degree or a good part of time	Applied to me very much or most of the time	Applied to me to some degree, or some of the time	Applied to me to a considerable degree or a good part of time	Applied to me to a considerable degree or a good part of time	Applied to me very much or most of the time	Applied to me to some degree, or some of the time	Applied to me to a considerable degree or a good part of time	Applied to me to a considerable degree or a good part of time
22	Male	Non-medical	4	Non-smoker	None	4	7	Several days	Not at all	Several days	Not at all	Several days	Not at all	Several days	Several days	Not at all	Applied to me to a considerable degree or a good part of time	Did not apply to me at all	Applied to me to some degree, or some of the time	Applied to me to a considerable degree or a good part of time	Applied to me very much or most of the time	Did not apply to me at all	Did not apply to me at all	Applied to me to some degree, or some of the time	Applied to me to some degree, or some of the time	Applied to me to some degree, or some of the time	Applied to me to some degree, or some of the time	Did not apply to me at all	Applied to me to some degree, or some of the time	Did not apply to me at all	Applied to me to some degree, or some of the time	Did not apply to me at all	Applied to me to some degree, or some of the time	Did not apply to me at all	Applied to me to some degree, or some of the time	Applied to me to some degree, or some of the time	Applied to me to some degree, or some of the time
22	Male	Non-medical	4	Non-smoker	None	10	10	Not at all	Nearly every day	Several days	More than half the days	More than half the days	Several days	Not at all	Not at all	Not at all	Did not apply to me at all	Did not apply to me at all	Applied to me to some degree, or some of the time	Applied to me to a considerable degree or a good part of time	Applied to me to a considerable degree or a good part of time	Applied to me very much or most of the time	Did not apply to me at all	Did not apply to me at all	Did not apply to me at all	Applied to me to some degree, or some of the time	Applied to me to some degree, or some of the time	Applied to me very much or most of the time	Applied to me very much or most of the time	Applied to me very much or most of the time	Applied to me to some degree, or some of the time	Applied to me to a considerable degree or a good part of time	Did not apply to me at all	Applied to me to some degree, or some of the time	Applied to me to a considerable degree or a good part of time	Applied to me very much or most of the time	Applied to me to a considerable degree or a good part of time
18	Female	Medical	1	Non-smoker	None	5	5	Several days	Not at all	Not at all	Several days	Not at all	Not at all	Not at all	Not at all	Several days	Did not apply to me at all	Did not apply to me at all	Applied to me to some degree, or some of the time	Did not apply to me at all	Applied to me to some degree, or some of the time	Applied to me to some degree, or some of the time	Applied to me to some degree, or some of the time	Did not apply to me at all	Did not apply to me at all	Did not apply to me at all	Applied to me to some degree, or some of the time	Did not apply to me at all	Did not apply to me at all	Applied to me to some degree, or some of the time	Applied to me to some degree, or some of the time	Did not apply to me at all	Did not apply to me at all	Applied to me to some degree, or some of the time	Applied to me to some degree, or some of the time	Applied to me to some degree, or some of the time	Did not apply to me at all
23	Male	Medical	4	Non-smoker	None	3	6	Several days	Several days	More than half the days	More than half the days	Several days	Several days	Several days	Not at all	Not at all	Applied to me to some degree, or some of the time	Did not apply to me at all	Applied to me to some degree, or some of the time	Did not apply to me at all	Applied to me to a considerable degree or a good part of time	Applied to me to a considerable degree or a good part of time	Did not apply to me at all	Did not apply to me at all	Applied to me to some degree, or some of the time	Applied to me to some degree, or some of the time	Did not apply to me at all	Applied to me to some degree, or some of the time	Applied to me to some degree, or some of the time	Applied to me to a considerable degree or a good part of time	Did not apply to me at all	Applied to me to a considerable degree or a good part of time	Did not apply to me at all	Did not apply to me at all	Applied to me to some degree, or some of the time	Applied to me to some degree, or some of the time	Applied to me to some degree, or some of the time
28	Male	Medical	5	Current smoker	Occasional	3	6	Several days	Not at all	More than half the days	Several days	Several days	Several days	More than half the days	More than half the days	More than half the days	Did not apply to me at all	Did not apply to me at all	Applied to me to some degree, or some of the time	Applied to me to some degree, or some of the time	Applied to me to some degree, or some of the time	Applied to me to some degree, or some of the time	Applied to me to some degree, or some of the time	Applied to me to some degree, or some of the time	Applied to me to some degree, or some of the time	Applied to me to some degree, or some of the time	Applied to me to some degree, or some of the time	Applied to me to some degree, or some of the time	Applied to me to some degree, or some of the time	Applied to me to some degree, or some of the time	Applied to me to some degree, or some of the time	Applied to me to some degree, or some of the time	Applied to me to some degree, or some of the time	Applied to me to some degree, or some of the time	Applied to me to some degree, or some of the time	Applied to me to a considerable degree or a good part of time	Did not apply to me at all
19	Female	Medical	1	Non-smoker	None	9	6	Nearly every day	Nearly every day	Nearly every day	Nearly every day	Nearly every day	Nearly every day	Not at all	Not at all	Not at all	Applied to me to some degree, or some of the time	Did not apply to me at all	Did not apply to me at all	Did not apply to me at all	Applied to me to some degree, or some of the time	Did not apply to me at all	Applied to me to some degree, or some of the time	Applied to me very much or most of the time	Applied to me very much or most of the time	Applied to me to some degree, or some of the time	Applied to me very much or most of the time	Applied to me very much or most of the time	Applied to me very much or most of the time	Did not apply to me at all	Did not apply to me at all	Did not apply to me at all	Applied to me to a considerable degree or a good part of time	Applied to me very much or most of the time	Applied to me to some degree, or some of the time	Applied to me very much or most of the time	Did not apply to me at all
[truncated: 227 more rows]
