# Supplementary material for: Stress in Study: Assessing Depression Differences Among Medical and Non- Medical Students
Source: Research Square preprint supplement (doi:10.21203/rs.3.rs-7508873/v1), 2025-09-16
Supplement: Supplementary file 2 [file 6f2d5ed22c1ddb9f4232eb11.docx]

**Stress in Study: Assessing Depression Differences Among Medical and Non-Medical Students**

**Section 1: Consent**

| **Statement** | **Yes** | **No** |
| --- | --- | --- |
| I consent to participate in this study and understand the purpose, voluntary nature, confidentiality, and my right to withdraw at any time without penalty. My questions have been answered satisfactorily. | ☐ | ☐ |

**Section 2: Demographic & Lifestyle Information**

| **Item** | **Response Choices** |
| --- | --- |
| **Age** * | ☐ 16 ☐ 17 ☐ 18 ☐ 19 ☐ 20 ☐ 21 ☐ 22 ☐ 23 ☐ 24 ☐ 25 ☐ 26 ☐ 27 ☐ 28 |
| **Gender** * | ☐ Male ☐ Female ☐ Other |
| **Year of Study** * | ☐ 1st Year (Sem 1 & 2) ☐ 2nd Year (Sem 3 & 4) ☐ 3rd Year (Sem 5 & 6) ☐ 4th Year (Sem 7 & 8) ☐ 5th Year (Sem 9 & 10) |
| **Educational Background** * | ☐ Medical ☐ Non-Medical |
| **Have you ever smoked?** | ☐ Non-Smoker ☐ Former Smoker ☐ Current Smoker |
| **How often do you consume alcohol?** | ☐ None ☐ Occasional ☐ Regular |
| **On a scale of 1-10, how would you rate your stress level?** | ☐1 ☐2 ☐3 ☐4 ☐5 ☐6 ☐7 ☐8 ☐9 ☐10 |
| **Have you been treated for depression?** | ☐ Yes ☐ No |
| **How many hours of sleep do you get per night?** | ☐1 ☐2 ☐3 ☐4 ☐5 ☐6 ☐7 ☐8 ☐9 ☐10 |

**Section 3: PHQ-9 (Mental Health Assessment)**

| **Question** | **Not at all** | **Several Days** | **More than Half** | **Nearly Every Day** |
| --- | --- | --- | --- | --- |
| 1. Little interest or pleasure in doing things | ☐ | ☐ | ☐ | ☐ |
| 2. Feeling down, depressed, or hopeless | ☐ | ☐ | ☐ | ☐ |
| 3. Trouble falling or staying asleep, or sleeping too much | ☐ | ☐ | ☐ | ☐ |
| 4. Feeling tired or having little energy | ☐ | ☐ | ☐ | ☐ |
| 5. Poor appetite or overeating | ☐ | ☐ | ☐ | ☐ |
| 6. Feeling bad about yourself or like a failure | ☐ | ☐ | ☐ | ☐ |
| 7. Trouble concentrating on things (e.g., watching TV, reading) | ☐ | ☐ | ☐ | ☐ |
| 8. Moving/speaking slowly or restlessness | ☐ | ☐ | ☐ | ☐ |
| 9. Thoughts that you would be better off dead, or hurting yourself | ☐ | ☐ | ☐ | ☐ |

**Impact of Symptoms**

| **Question** | **Not Difficult** | **Somewhat Difficult** | **Very Difficult** | **Extremely Difficult** |
| --- | --- | --- | --- | --- |
| If you checked off any problems, how difficult have they made work, home life, or interactions? | ☐ | ☐ | ☐ | ☐ |

**Section 4: DASS-21 (Mental Health Scale – Past Week)**

| **Statement** | **Not at all** | **Some Degree** | **Considerable Degree** | **Very Much** |
| --- | --- | --- | --- | --- |
| 1. I found it hard to wind down | ☐ | ☐ | ☐ | ☐ |
| 2. I was aware of dryness in my mouth | ☐ | ☐ | ☐ | ☐ |
| 3. I couldn’t seem to experience any positive feelings | ☐ | ☐ | ☐ | ☐ |
| 4. Breathing difficulty without exertion | ☐ | ☐ | ☐ | ☐ |
| 5. I found it difficult to work up initiative to do things | ☐ | ☐ | ☐ | ☐ |
| 6. I tended to overreact to situations | ☐ | ☐ | ☐ | ☐ |
| 7. I experienced trembling (e.g., hands) | ☐ | ☐ | ☐ | ☐ |
| 8. I felt I was using a lot of nervous energy | ☐ | ☐ | ☐ | ☐ |
| 9. I was worried about situations in which I might panic | ☐ | ☐ | ☐ | ☐ |
| 10. I felt that I had nothing to look forward to | ☐ | ☐ | ☐ | ☐ |
| 11. I found myself getting agitated | ☐ | ☐ | ☐ | ☐ |
| 12. I found it difficult to relax | ☐ | ☐ | ☐ | ☐ |
| 13. I felt down-hearted and blue | ☐ | ☐ | ☐ | ☐ |
| 14. I was intolerant of anything that kept me from getting on with what I was doing | ☐ | ☐ | ☐ | ☐ |
| 15. I felt I was close to panic | ☐ | ☐ | ☐ | ☐ |
| 16. I was unable to become enthusiastic about anything | ☐ | ☐ | ☐ | ☐ |
| 17. I felt I wasn’t worth much as a person | ☐ | ☐ | ☐ | ☐ |
| 18. I felt that I was rather touchy (easily irritated) | ☐ | ☐ | ☐ | ☐ |
| 19. I was aware of my heart racing (without physical exertion) | ☐ | ☐ | ☐ | ☐ |
| 20. I felt scared without good reason | ☐ | ☐ | ☐ | ☐ |
| 21. I felt that life was meaningless | ☐ | ☐ | ☐ | ☐ |
